# Supplementary material for: Life cycle assessment of oilseed crops produced in rotation with dryland cereals in the inland Pacific Northwest
Source: Springer Nature journal article supplement (doi:10.1007/s11367-018-1488-y), 2018-06-04
Supplement: MOESM1 [file 15818490]

electronic supplementary material

[LCA for agricultural practices and biobased industrial products](javascript:popupClassificationDetail(48))

**Life cycle assessment of oilseed crops produced in rtation with dryland cereals in the inland Pacific Northwest**

**Sharath Kumar Ankathi1 • Dan S. Long2 • Hero T. Gollany2 • Prajesh Das1 • David Shonnard1,3**

Received: 4 January 2018 / Accepted: 22 May 2018

© Springer-Verlag GmbH Germany, part of Springer Nature 2018

Responsible editor: Greg Thoma

1Department of Chemical Engineering, Michigan Technological University, Houghton, MI

2USDA-ARS, Soil and Water Conservation Research Unit, Adams, OR

3Sustainable Futures Institute, Michigan Technological University. Houghton, MI

 Sharath Kumar Ankathi

[skankath@mtu.edu](mailto:skankath@mtu.edu)

 David Shonnard

[drshonna@mtu.edu](mailto:drshonna@mtu.edu)

This document is divided into multiple sections for ease of access. Section 1A gives information on prices, yields and calculations of allocation factor (both mass and market value). Primary data received from USDA and Alberta Agriculture in Canada are typically in non-metric customary units (e.g., gallon, ounce, pound, bushel, acre, etc.).

**Table of Content for Section 1A**

| **Table No** | **Content** | **Page no** |
| --- | --- | --- |
| S1 | Crop prices of different cereal and oilseeds (spring and winter) | 3 |
| S2 | Average yields different rotation crops over 5 years including the standard deviation (SD) values | 3 |
| S3 | Total average sales values of individual rotation with SD and allocation factors based on price | 4 |
| S4 | Total average yield values of individual rotation with SD and allocation factors based on yield | 4 |
| S5 | Lower heating values for oil and oilseed meal | 5 |
| S6 | Total average oil concentrations in oilseed of individual oilseed rotation and energy allocation factors based on LHV of oil and oil meal | 5 |
| S7 | Intensity of energy demand (return on investment) for different oilseed crop rotations (Using both mass and market value allocation) | 6 |

Table S1: Crop prices of different cereal and oilseeds (spring and winter)

| CROP | PRICE | Price per | Price per kg | NOTES |
| --- | --- | --- | --- | --- |
| Wheat (Soft White Winter) | $5.40 | Bushel | $0.20 | PNW Farmers, Lewiston, ID |
| Wheat (Soft White Winter) | $5.40 | Bushel | $0.20 | NW Grain, Walla Walla, WA |
| Wheat (Soft White Winter) | $4.96 | Bushel | $0.18 | United Grain (McNary) |
| Wheat (Hard Red Spring) | $7.45 | Bushel | $0.27 | PNW Farmers, Lewiston, ID |
| Wheat (Hard Red Spring) | $7.02 | Bushel | $0.26 | United Grain (McNary) |
| Wheat (Hard Red Spring) | $7.46 | Bushel | $0.27 | NW Grain, Walla Walla, WA |
| Barley (Spring, Feed) | $3.20 | Bushel | $0.15 | CHS Prime land, Lewiston, ID |
| Barley (Spring, Feed) | $3.12 | Bushel | $0.15 | PNW Farmers, Lewiston, ID |
| Barley (Spring, Feed) | $3.00 | Bushel | $0.14 | NW Grain, Walla Walla, WA |
| Barley (Spring, Feed) | $2.45 | Bushel | $0.12 | Central WA Grain, Wilbur, WA |
| Triticale (Winter) | $2.58 | Bushel | $0.11 | Central WA Grain, Wilbur, WA |
| Triticale (Spring) | $2.58 | Bushel | $0.11 | Central WA Grain, Wilbur, WA |
| Canola | $0.17 | lb. | $0.37 | NW Grain, Walla Walla, WA |
| Canola | $0.19 | lb. | $0.42 | Pomeroy Grain, Pomeroy, WA |
| Carinata (for rapeseed) | $0.18 | lb. | $0.40 | CHS Prime land, Lewiston, ID |

Table S2: Average yields different rotation crops over 5 years including the standard deviation (SD) values

| Crop(rotation) | Average yield per year (kg/ hectare) | +ve SD value | -ve SD value |
| --- | --- | --- | --- |
| WW(SF-WW) | 2879.4 | 720.9 | -720.9 |
| WW(RTF -WW) | 3036.4 | 527.7 | -527.7 |
| WW(RTF-WW-RTF-WO) | 2995.3 | 170.3 | -170.3 |
| WO(RTF -WO-RTF -WW) | 1338.9 | 374.7 | -374.7 |
| WW(RTF-WW-SB) | 3242.3 | 533.2 | -533.2 |
| SB(RTF -WW-SB) | 1182.2 | 471.5 | -471.5 |
| WW(RTF-WW-SO) | 2918.5 | 453.9 | -453.9 |
| SO(RTF -WW-SO) | 552.2 | 212.0 | -212.0 |
| WO(RTF -WO-SW) | 1069.4 | 527.5 | -527.5 |
| SW(RTF -WO-SW) | 1014.9 | 247.5 | -247.5 |
| SW(RTF -SO-SW) | 1046.9 | 213.1 | -213.1 |
| SO(RTF -SO-SW) | 920.5 | 456.5 | -456.5 |
| WO (RTF -WO-ST) | 978.5 | 544.6 | -544.6 |
| ST(RTF -WO-ST) | 500.9 | 186.2 | -186.2 |
| WT (RTF -WT-SO) | 1756.8 | 487.5 | -487.5 |
| SO(RTF-WT-SO) | 557.2 | 212.6 | -212.6 |

Table S3: Total average sales values of individual rotation with SD and allocation factors based on price

| Crop(rotation) | Average sales value ($/ acre) | Average sales value with +ve SD ($/ acre) | Average sales value with -ve SD ($/ acre) | Market value allocation factor | Market value allocation factor with +ve SD | Market value allocation factor with -ve SD |
| --- | --- | --- | --- | --- | --- | --- |
| WW(SF -WW) | 224.93 | 281.25 | 168.61 | N/A | N/A | N/A |
| WW(RTF -WW) | 237.19 | 278.41 | 195.97 | N/A | N/A | N/A |
| WW(RTF-WW-RTF-WO) | 233.98 | 247.28 | 220.68 | N/A | N/A | N/A |
| WO(RTF-WO-RTF-WW) | 215.02 | 275.19 | 154.84 | N/A | N/A | N/A |
| WW(RTF-WW-SB) | 253.27 | 294.92 | 211.62 | 0.789 | 0.757 | 0.839 |
| SB(RTF-WW-SB) | 67.57 | 94.52 | 40.62 | 0.211 | 0.243 | 0.161 |
| WW(RTF-WW-SO) | 227.98 | 263.44 | 192.52 | 0.720 | 0.682 | 0.779 |
| SO(RTF-WW-SO) | 88.69 | 122.73 | 54.64 | 0.280 | 0.318 | 0.221 |
| WO(RTF-WO-SW) | 171.73 | 256.44 | 87.03 | 0.609 | 0.651 | 0.511 |
| SW(RTF-WO-SW) | 110.32 | 137.22 | 83.42 | 0.391 | 0.349 | 0.489 |
| SW(RTF-SO-SW) | 113.80 | 136.96 | 90.63 | 0.435 | 0.382 | 0.549 |
| SO(RTF-SO-SW) | 147.83 | 221.14 | 74.52 | 0.565 | 0.618 | 0.451 |
| WO (RTF-WO-ST) | 157.14 | 244.59 | 69.69 | 0.876 | 0.889 | 0.833 |
| ST(RTF-WO-ST) | 22.17 | 30.41 | 13.93 | 0.124 | 0.111 | 0.167 |
| WT (RTF-WT-SO) | 77.77 | 99.35 | 56.19 | 0.465 | 0.446 | 0.504 |
| SO(RTF-WT-SO) | 89.48 | 123.62 | 55.33 | 0.535 | 0.554 | 0.496 |

Table S4: Total average yield values of individual rotation with SD and allocation factors based on yield

| Crop(rotation) | Average yield (kg/ acre) | Average yield with +ve SD (kg/ acre) | Average yield with -ve SD (kg/ acre) | Mass allocation factor | Mass allocation factor with +ve SD | Mass allocation factor with -ve SD |
| --- | --- | --- | --- | --- | --- | --- |
| WW(SF-WW) | 1165.3 | 1457.0 | 873.5 | N/A | N/A | N/A |
| WW(RTF-WW) | 1228.8 | 1442.3 | 1015.2 | N/A | N/A | N/A |
| WW(RTF-WW-RTF-WO) | 1212.1 | 1281.1 | 1143.2 | N/A | N/A | N/A |
| WO(RTF-WO-RTF-WW) | 541.8 | 693.5 | 390.2 | N/A | N/A | N/A |
| WW(RTF-WW-SB) | 1312.1 | 1527.9 | 1096.3 | 0.733 | 0.695 | 0.792 |
| SB(RTF-WW-SB) | 478.4 | 669.2 | 287.6 | 0.267 | 0.305 | 0.208 |
| WW(RTF-WW-SO) | 1181.1 | 1364.8 | 997.4 | 0.841 | 0.815 | 0.879 |
| SO(RTF-WW-SO) | 223.5 | 309.3 | 137.7 | 0.159 | 0.185 | 0.121 |
| WO(RTF-WO-SW) | 432.8 | 646.2 | 219.3 | 0.513 | 0.558 | 0.414 |
| SW(RTF-WO-SW) | 410.7 | 510.9 | 310.6 | 0.487 | 0.442 | 0.586 |
| SW(RTF-SO-SW) | 423.7 | 509.9 | 337.4 | 0.532 | 0.478 | 0.642 |
| SO(RTF-SO-SW) | 372.5 | 557.3 | 187.8 | 0.468 | 0.522 | 0.358 |
| WO (RTF-WO-ST) | 396.0 | 616.4 | 175.6 | 0.661 | 0.689 | 0.580 |
| ST(RTF-WO-ST) | 202.7 | 278.1 | 127.3 | 0.339 | 0.311 | 0.420 |
| WT (RTF-WT-SO) | 711.0 | 908.2 | 513.7 | 0.759 | 0.745 | 0.786 |
| SO(RTF-WT-SO) | 225.5 | 311.5 | 139.4 | 0.241 | 0.255 | 0.214 |

Table S5: Lower heating values for oil and oilseed meal.

| LHV oil | 37.5 | MJ energy/ kg oil | [4] |
| --- | --- | --- | --- |
| LHV oil meal | 18.2 | MJ energy/ kg oil meal | [5] |

Table S6: Total average oil concentrations in oilseed of individual oilseed rotation and energy allocation factors based on LHV of oil and oil meal

| Rotation | % oil in oilseed | Mass allocation  MJ/ kg oilseed | Market value allocation MJ/ kg oilseed | EAF |
| --- | --- | --- | --- | --- |
| RTF-WO -WW-RTF | 36.3 | 6.67 | - | 0.54 |
| RTF-WW-SO | 34.5 | 14.1 | 14.7 | 0.52 |
| RTF-WO-SW | 39 | 7.64 | 7.87 | 0.57 |
| RTF-SO-SW | 34.075 | 9.31 | 9.58 | 0.52 |
| RTF-WO-ST | 38.925 | 8.88 | 9.5 | 0.57 |
| RTF-WT-SO | 35.075 | 14.2 | 15.5 | 0.53 |

Table S7: Intensity of energy demand (return on investment) for different oilseed crop rotations (Using both mass and market value allocation)

| Rotation | Mass allocation  MJ energy consumed/ kg oil | MJ energy consumed / MJ energy in oil | Market value allocation  MJ energy consumed/ kg oil | MJ energy consumed / MJ energy in oil |
| --- | --- | --- | --- | --- |
| RTF-WO-RTF-WW | 9.92 | 0.26 | N/A | N/A |
| RTF-WW-SO | 21.27 | 0.57 | 22.18 | 0.59 |
| RTF-WO-SW | 11.14 | 0.30 | 11.47 | 0.31 |
| RTF-SO-SW | 14.09 | 0.38 | 14.50 | 0.39 |
| RTF-WO-ST | 12.95 | 0.35 | 13.86 | 0.37 |
| RTF-WT-SO | 21.33 | 0.57 | 23.28 | 0.62 |

Section-1B provides the information on input field activities (averaged per year), and the conversion of the pesticides and fuel usage.

Tables 8-17 show the average input field activities per year for both 2-year and 3-year rotations on per acre basis. Data on fuel usage were derived using the Farm Machinery Cost Calculator available at <https://www.agric.gov.ab.ca/app24/costcalculators/machinery/getmachimpls.jsp>. Fuel usage is reported in liters per acre. Though Canada has converted to the metric system, non-metric units remain in use in the agricultural sector.

**Table of Content for Section 1B**

| **Table No** | **Content** | **Page no** |
| --- | --- | --- |
| S8 | Average input field activities for rotation SF-WW on the basis of per acre per year | 8 |
| S9 | Average input field activities for rotation RTF-WW on the basis of per acre per year | 10 |
| S10 | Average input field activities for rotation RTF-WO (RTF-WO-RTF-WW) on the basis of per acre per year | 12 |
| S11 | Average input field activities for rotation RTF-WW (RTF-WW-RTF-WO) on the basis of per acre per year | 13 |
| S12 | Average input field activities for rotation RTF-WW-SB on the basis of per acre per year | 15 |
| S13 | Average input field activities for rotation RTF-WW-SO on the basis of per acre per year | 19 |
| S14 | Average input field activities for rotation RTF-WO-SW on the basis of per acre per year | 23 |
| S15 | Average input field activities for rotation RTF-SO-SW on the basis of per acre per year | 26 |
| S16 | Average input field activities for rotation RTF-WO-ST on the basis of per acre per year | 30 |
| S17 | Average input field activities for rotation RTF-SO-WT on the basis of per acre per year | 33 |

Table S8: Average input field activities for rotation SF-WW on the basis of per acre per year

| **SF Field Practices** | **Powered Equipment** | **Fuel** | **Implement** | **Seed Rate (lb/ac)** | **N (lb/ac)** | **S (lb/ac)** | **Pesticide** | **oz/ac** | **Avg**  **oz/ac** | **Fuel Usage (liters/hour)** | **Field Rate (acres/hour)** | **Avg. fuel use (liters/acre)** |
| --- | --- | --- | --- | --- | --- | --- | --- | --- | --- | --- | --- | --- |
| Disked Summer Fallow | Tractor - 4WD 475 HP | Diesel | Disc - tandem HD 30-ft wing |  |  |  |  |  |  | 71 | 12.78 | 5.555 |
| Rod weeding/cultivating | Tractor - 4WD 475 HP | Diesel |  |  |  |  |  |  |  | 71 | 18.67 | 6.084 |
| Post-Harvest spray | Sprayer 600-gal 70-ft 125-135 HP high clearance | Diesel |  |  |  |  | Roundup Power Max | 64 | 12.8 | 18.2 | 50.9 | 0.071 |
| Post-Harvest spray | Sprayer 600-gal 70-ft 125-135 HP high clearance | Diesel |  |  |  |  | Paraquat Concentrate | 51 | 10.2 | 18.2 | 50.9 | 0.071 |
| Post-Harvest spray | Sprayer 600-gal 70-ft 125-135 HP high clearance | Diesel |  |  |  |  | Paraquat Concentrate | 60 | 12 | 18.2 | 50.9 | 0.071 |
| Spray for weeds | Sprayer 600-gal 70-ft 125-135 HP high clearance | Diesel |  |  |  |  | Roundup RT3 | 48 | 9.6 | 18.2 | 50.9 | 0.071 |
| Gunsmoke | 3.2 | 0.64 |
| Spray for weeds | Sprayer 600-gal 70-ft 125-135 HP high clearance | Diesel |  |  |  |  | Roundup RT3 | 32 | 6.4 | 18.2 | 50.9 | 0.071 |
| Choice | 6.4 | 1.28 |
| Liberate | 6.4 | 1.28 |
| Unfoamer | 0.8 | 0.16 |
| Flail mow | Tractor - 4WD 475 HP | Diesel | Rears 30-ft flail chopper |  |  |  |  |  |  | 71 | 12.78 | 1.111 |
| Pre-plant herbicide application | Sprayer 600-gal 70-ft 125-135 HP high clearance | Diesel |  |  |  |  | Roundup Power Max | 64 | 12.8 | 18.2 | 50.9 | 0.071 |
| Cultivate (two passes) | Tractor - 4WD 475 HP | Diesel | 44-ft Field cultivator |  |  |  |  |  |  | 71 | 18.67 | 0.760 |
| Spray for insects | Bell 47 helicopter, Lycoming VO435 | Avgas |  |  |  |  | Silencer | 3.5 | 1.4 | 75.7 | 352 | 0.086 |
| Tactic | 1.6 | 0.64 |
| Post-harvest spray | Bell 47 helicopter, Lycoming VO435 | Avgas |  |  |  |  | Cyclone (generic Paraquate) | 64 | 25.6 | 18.2 | 50.9 | 0.143 |

| **WW Field Practices** | **Powered Equipment** | **Fuel** | **Implement** | **Seed Rate (lb/ac)** | **N (lb/ac)** | **S (lb/ac)** | **Pesticide** | **oz/ac** | **Avg**  **oz/ac** | **Fuel Usage (liters/hour)** | **Field Rate (acres/hour)** | **Avg. fuel use (liters/acre)** |
| --- | --- | --- | --- | --- | --- | --- | --- | --- | --- | --- | --- | --- |
| Flail mow | Tractor - 4WD 475 HP | Diesel | Rears 30-ft flail chopper |  |  |  |  |  |  | 71 | 12.78 | 1.111 |
| Harvest | Combine 350 hp | Diesel |  |  |  |  |  |  |  | 56 | 10.67 | 5.248 |
| Post-harvest spray | Sprayer 600-gal 70-ft 125-135 HP high clearance | Diesel |  |  |  |  | Gramoxone | 64 | 12.8 | 18.2 | 50.9 | 0.071 |
| Gunsmoke | 9.6 | 1.92 |
| Liberate | 9.6 | 1.92 |
| Unfoamer | 1.5 | 0.3 |
| Post-Harvest spray | Sprayer 600-gal 70-ft 125-135 HP high clearance | Diesel |  |  |  |  | Roundup Power Max | 64 | 12.8 | 18.2 | 50.9 | 0.071 |
| Post-Harvest spray | Sprayer 600-gal 70-ft 125-135 HP high clearance | Diesel |  |  |  |  | Paraquat Concentrate | 51 | 10.2 | 18.2 | 50.9 | 0.071 |
| Post-Harvest spray | Sprayer 600-gal 70-ft 125-135 HP high clearance | Diesel |  |  |  |  | Paraquat Concentrate | 60 | 12 | 18.2 | 50.9 | 0.071 |
| Post-harvest spray | Bell 47 helicopter, Lycoming VO435 | Avgas |  |  |  |  | Cyclone (generic Paraquate) | 64 | 12.8 | 18.2 | 50.9 | 0.071 |
| Spray for weeds | Sprayer 600-gal 70-ft 125-135 HP high clearance | Diesel |  |  |  |  | Huskie | 14 | 2.8 | 18.2 | 50.9 | 0.071 |
| AffinityBroad Spec | 0.5 | 0.1 |
| Osprey | 4.75 | 0.95 |
| Fitness | 6 | 1.2 |
| Liberate | 3.2 | 0.64 |
| Spray for weeds | Sprayer 600-gal 70-ft 125-135 HP high clearance | Diesel |  |  |  |  | Vendetta | 32 | 6.4 | 18.2 | 50.9 | 0.071 |
| Harmony Extra | 0.5 | 0.1 |
| Spray for weeds | Sprayer 600-gal 70-ft 125-135 HP high clearance | Diesel |  |  |  |  | Huskie | 14 | 2.8 | 18.2 | 50.9 | 0.071 |
| Osprey | 4.75 | 0.95 |
| Liberate | 6.4 | 1.28 |
| Unfoamer | 1.2 | 0.24 |
| Solution 32 | 64 | 12.8 |
| Seeding winter wheat | Tractor - 4WD 475 HP | Diesel | 55-ft air drill with packer wheels | 114.75 | 55 | 11 |  |  |  | 71 | 20 | 3.55 |
| Pre-plant herbicide application | Sprayer 600-gal 70-ft 125-135 HP high clearance | Diesel |  |  |  |  | Roundup Power Max | 64 | 12.8 | 18.2 | 50.9 | 0.071 |
| Spray for insects | Bell 47 helicopter, Lycoming VO435 | Avgas |  |  |  |  | Silencer | 3.5 | 1.4 | 75.7 | 352 | 0.086 |
| Tactic | 1.6 | 0.64 |

Table S9: Average input field activities for rotation RTF-WW on the basis of per acre per year

| **RTF Field Practices** | **Powered Equipment** | **Fuel** | **Implement** | **Seed Rate (lb/ac)** | **N (lb/ac)** | **S (lb/ac)** | **Pesticide** | **oz/ac** | **Avg**  **oz/ac** | **Fuel Usage (liters/hour)** | **Field Rate (acres/hour)** | **Avg. fuel use (liters/acre)** |
| --- | --- | --- | --- | --- | --- | --- | --- | --- | --- | --- | --- | --- |
| Spray for weeds | Sprayer 600-gal 70-ft 125-135 HP high clearance | Diesel |  |  |  |  | Roundup Power Max | 64 | 12.8 | 18.2 | 50.9 | 0.071 |
| Spray for weeds | Sprayer 600-gal 70-ft 125-135 HP high clearance | Diesel |  |  |  |  | Roundup Power Max | 32 | 6.4 | 18.2 | 50.9 | 0.071 |
| Spray for weeds | Sprayer 600-gal 70-ft 125-135 HP high clearance | Diesel |  |  |  |  | Gly Star Plus | 48 | 9.6 | 18.2 | 50.9 | 0.071 |
| Spray for weeds | Sprayer 600-gal 70-ft 125-135 HP high clearance | Diesel |  |  |  |  | Roundup RT3 | 64 | 25.6 | 18.2 | 50.9 | 0.143 |
| Spray for weeds | Sprayer 600-gal 70-ft 125-135 HP high clearance | Diesel |  |  |  |  | Roundup RT3 | 32 | 6.4 | 18.2 | 50.9 | 0.071 |
| Choice | 6.4 | 1.28 |
| Liberate | 6.4 | 1.28 |
| Unfoamer | 0.8 | 0.16 |
| Spray for weeds | Sprayer 600-gal 70-ft 125-135 HP high clearance | Diesel |  |  |  |  | Roundup RT3 | 44 | 8.8 | 18.2 | 50.9 | 0.071 |
| Rifle | 12 | 2.4 |
| Gunsmoke | 6.4 | 1.28 |
| Liberate | 6.4 | 1.28 |
| Unfoamer | 1 | 0.2 |
| Conservation tillage | Tractor - 4WD 475 HP | Diesel | 30-ft wide blade sweep |  |  |  |  |  |  | 71 | 12.78 | 5.555 |
| Post-harvest spray | Sprayer 600-gal 70-ft 125-135 HP high clearance | Diesel |  |  |  |  | Roundup Power Max | 64 | 12.8 | 18.2 | 50.9 | 0.071 |
| Post-harvest spray | Sprayer 600-gal 70-ft 125-135 HP high clearance | Diesel |  |  |  |  | Paraquat Concentrate | 51 | 10.2 | 18.2 | 50.9 | 0.071 |
| Post-harvest spray | Sprayer 600-gal 70-ft 125-135 HP high clearance | Diesel |  |  |  |  | Paraquat Concentrate | 60 | 12 | 18.2 | 50.9 | 0.071 |
| Post-harvest spray | Bell 47 helicopter, Lycoming VO435 | **Avgas** |  |  |  |  | Cyclone (generic Paraquate) | 64 | 25.6 | 18.2 | 50.9 | 0.143 |
| Pre-plant herbicide application | Sprayer 600-gal 70-ft 125-135 HP high clearance | Diesel |  |  |  |  | Roundup Power Max | 64 | 12.8 | 18.2 | 50.9 | 0.071 |
| Spray for weeds | Sprayer 600-gal 70-ft 125-135 HP high clearance | Diesel |  |  |  |  | Roundup RT3 | 48 | 9.6 | 18.2 | 50.9 | 0.071 |
| Gunsmoke | 3.2 | 0.64 |
| Flail mow | Tractor - 4WD 475 HP | Diesel | Rears 30-ft flail chopper |  |  |  |  |  |  | 71 | 12.78 | 1.1111 |
| Spray for weeds | Sprayer 600-gal 70-ft 125-135 HP high clearance | Diesel |  |  |  |  | Roundup RT3 | 64 | 12.8 | 18.2 | 50.9 | 0.071 |
| Affinity BroadSpec | 0.5 | 0.1 |
| Liberate | 6.4 | 1.28 |
| Spray for insects | Bell 47 helicopter, Lycoming VO435 | Avgas |  |  |  |  | Silencer | 3.5 | 1.4 | 75.7 | 352 | 0.086 |
| Tactic | 1.6 | 0.64 |

| **WW Field Practices** | **Powered Equipment** | **Fuel** | **Implement** | **Seed Rate (lb/ac)** | **N (lb/ac)** | **S (lb/ac)** | **Pesticide** | **oz/ac** | **Avg**  **oz/ac** | **Fuel Usage (liters/hour)** | **Field Rate (acres/hour)** | **Avg. fuel use (liters/acre)** |
| --- | --- | --- | --- | --- | --- | --- | --- | --- | --- | --- | --- | --- |
| Post-harvest spray | Sprayer 600-gal 70-ft 125-135 HP high clearance | Diesel |  |  |  |  | Roundup Power Max | 64 | 12.8 | 18.2 | 50.9 | 0.071 |
| Post-harvest spray | Sprayer 600-gal 70-ft 125-135 HP high clearance | Diesel |  |  |  |  | Paraquat Concentrate | 51 | 10.2 | 18.2 | 50.9 | 0.071 |
| Post-harvest spray | Sprayer 600-gal 70-ft 125-135 HP high clearance | Diesel |  |  |  |  | Paraquat Concentrate | 60 | 12 | 18.2 | 50.9 | 0.071 |
| Post-harvest spray | Bell 47 helicopter, Lycoming VO435 | Avgas |  |  |  |  | Cyclone | 64 | 25.6 | 18.2 | 50.9 | 0.143 |
| Post-harvest spray | Sprayer 600-gal 70-ft 125-135 HP high clearance | Diesel |  |  |  |  | Gramoxone | 64 | 12.8 | 18.2 | 50.9 | 0.071 |
| Gunsmoke | 9.6 | 1.92 |
| Liberate | 9.6 | 1.92 |
| Unfoamer | 1.5 | 0.3 |
| Pre-plant herbicide application | Sprayer 600-gal 70-ft 125-135 HP high clearance | Diesel |  |  |  |  | Roundup Power Max | 64 | 12.8 | 18.2 | 50.9 | 0.071 |
| Seeding winter wheat | Tractor - 4WD 475 HP | Diesel | 55-ft air drill with packer | 114.75 | 55 | 11 |  |  |  | 71 | 20 | 3.55 |
| Spray for weeds | Sprayer 600-gal 70-ft 125-135 HP high clearance | Diesel |  |  |  |  | Vendetta | 32 | 6.4 | 18.2 | 50.9 | 0.071 |
| Harmony Extra | 0.5 | 0.1 |
| Spray for weeds | Sprayer 600-gal 70-ft 125-135 HP high clearance | Diesel |  |  |  |  | Huskie | 14 | 2.8 | 18.2 | 50.9 | 0.071 |
| Osprey | 4.75 | 0.95 |
| Liberate | 6.4 | 1.28 |
| Unfoamer | 1.2 | 0.24 |
| Solution 32 | 64 | 12.8 |
| Flail mow | Tractor - 4WD 475 HP | Diesel | Rears 30-ft flail chopper |  |  |  |  |  |  | 71 | 12.78 | 1.111 |
| Spray for weeds | Sprayer 600-gal 70-ft 125-135 HP high clearance | Diesel |  |  |  |  | Huskie | 14 | 2.8 | 18.2 | 50.9 | 0.071 |
| AffinityBroad Spec | 5 | 1 |
| Osprey | 4.75 | 0.95 |
| Fitness | 6 | 1.2 |
| Liberate | 3.2 | 0.64 |
| Spray for insects | Bell 47 helicopter, Lycoming VO435 | Avgas |  |  |  |  | Silencer | 3.5 | 1.4 | 75.7 | 352 | 0.107 |
| Tactic | 1.6 | 0.64 |
| Harvest | Combine 350 hp |  |  |  |  |  |  |  |  | 56 | 10.67 | 5.248 |

Table S10: Average input field activities for rotation RTF-WO (RTF-WO-RTF-WW) on the basis of per acre per year

| **RTF Field Practices** | **Powered Equipment** | **Fuel** | **Implement** | **Seed Rate (lb/ac)** | **N (lb/ac)** | **S (lb/ac)** | **Pesticide** | **oz/ac** | **Avg**  **oz/ac** | **Fuel Usage (liters/hour)** | **Field Rate (acres/hour)** | **Avg. fuel use (liters/acre)** |
| --- | --- | --- | --- | --- | --- | --- | --- | --- | --- | --- | --- | --- |
| Conservation tillage | Tractor - 4WD 475 HP | Diesel | 30-ft wide blade sweep |  |  |  |  |  |  | 71 | 12.78 | 5.555 |
| Flail mow | Tractor - 4WD 475 HP | Diesel | Rears 30-ft flail chopper |  |  |  |  |  |  |  |  |  |
| Post-harvest spray | Sprayer 600-gal 70-ft 125-135 HP high clearance | Diesel |  |  |  |  | Roundup Power Max | 64 | 12.8 | 18.2 | 50.9 | 0.071 |
| Post-harvest spray | Sprayer 600-gal 70-ft 125-135 HP high clearance | Diesel |  |  |  |  | Paraquat Concentrate | 51 | 10.2 | 18.2 | 50.9 | 0.071 |
| Post-harvest spray | Sprayer 600-gal 70-ft 125-135 HP high clearance | Diesel |  |  |  |  | Paraquat Concentrate | 60 | 12 | 18.2 | 50.9 | 0.071 |
| Post-harvest spray | Sprayer 600-gal 70-ft 125-135 HP high clearance | Diesel |  |  |  |  | Cyclone (generic Paraquate) | 64 | 12.8 | 18.2 | 50.9 | 0.071 |
| Pre-plant herbicide application | Sprayer 600-gal 70-ft 125-135 HP high clearance | Diesel |  |  |  |  | Roundup Power Max | 64 | 12.8 | 18.2 | 50.9 | 0.071 |
| Spray for weeds | Sprayer 600-gal 70-ft 125-135 HP high clearance | Diesel |  |  |  |  | Roundup RT3 | 44 | 8.8 | 18.2 | 50.9 | 0.071 |
| Rifle | 12 | 2.4 |
| Gunsmoke | 6.4 | 1.28 |
| Liberate | 6.4 | 1.28 |
| Unfoamer | 1 | 0.2 |
| Spray for weeds | Sprayer 600-gal 70-ft 125-135 HP high clearance | Diesel |  |  |  |  | Roundup RT3 | 32 | 6.4 | 18.2 | 50.9 | 0.071 |
| Choice | 6.4 | 1.28 |
| Liberate | 6.4 | 1.28 |
| Unfoamer | 0.8 | 0.16 |
| Spray for weeds | Sprayer 600-gal 70-ft 125-135 HP high clearance | Diesel |  |  |  |  | Roundup Power Max | 64 | 12.8 | 18.2 | 50.9 | 0.071 |
| Spray for weeds | Sprayer 600-gal 70-ft 125-135 HP high clearance | Diesel |  |  |  |  | Roundup Power Max | 32 | 6.4 | 18.2 | 50.9 | 0.071 |
| Spray for weeds | Sprayer 600-gal 70-ft 125-135 HP high clearance | Diesel |  |  |  |  | Gly Star Plus | 48 | 9.6 | 18.2 | 50.9 | 0.071 |
| Spray for weeds | Sprayer 600-gal 70-ft 125-135 HP high clearance | Diesel |  |  |  |  | Roundup RT3 | 64 | 12.8 | 18.2 | 50.9 | 0.071 |
| Spray for weeds | Sprayer 600-gal 70-ft 125-135 HP high clearance | Diesel |  |  |  |  | Roundup RT3 | 48 | 9.6 | 18.2 | 50.9 | 0.071 |
| Gunsmoke | 3.2 | 0.64 |
| Spray for weeds | Sprayer 600-gal 70-ft 125-135 HP high clearance | Diesel |  |  |  |  | Roundup RT3 | 64 | 12.8 | 18.2 | 50.9 | 0.071 |
| Affinity BroadSpec | 0.5 | 0.1 |
| Liberate | 6.4 | 1.28 |

| **WO Field Practices** | **Powered Equipment** | **Fuel** | **Implement** | **Seed Rate (lb/ac)** | **N (lb/ac)** | **S (lb/ac)** | **Pesticide** | **oz/ac** | **Avg**  **oz/ac** | **Fuel Usage (liters/hour)** | **Field Rate (acres/hour)** | **Avg. fuel use (liters/acre)** |
| --- | --- | --- | --- | --- | --- | --- | --- | --- | --- | --- | --- | --- |
| Flail mow | Tractor - 4WD 475 HP | Diesel | Rears 30-ft flail chopper |  |  |  |  |  |  | 71 | 12.78 | 1.111 |
| Harvest | Combine 350 hp | Diesel |  |  |  |  |  |  |  | 56 | 10.67 | 5.248 |
| Post-harvest spray | Sprayer 600-gal 70-ft 125-135 HP high clearance | Diesel |  |  |  |  | Paraquat Concentrate | 60 | 12 | 18.2 | 50.9 | 0.071 |
| Post-harvest spray | Sprayer 600-gal 70-ft 125-135 HP high clearance | Diesel |  |  |  |  | Cyclone (generic Paraquate) | 64 | 12.8 | 18.2 | 50.9 | 0.071 |
| Post-harvest spray | Sprayer 600-gal 70-ft 125-135 HP high clearance | Diesel |  |  |  |  | Gramoxone | 64 | 12.8 | 18.2 | 50.9 | 0.071 |
| Gunsmoke | 9.6 | 1.92 |
| Liberate | 9.6 | 1.92 |
| Unfoamer | 1.5 | 0.3 |
| Seeding winter canola | Tractor - 4WD 475 HP | Diesel | 55-ft air drill with packer wheels | 5.464 | 55 | 11 |  |  |  | 71 | 20 | 3.55 |
| Spray for insects | Bell 47 helicopter, Lycoming VO435 | Avgas |  |  |  |  | Lambda-CY | 3.84 | 1.536 | 75.7 | 352 | 0.086 |
| Wetcit | 5 | 2 |
| Spray for insects | Bell 47 helicopter, Lycoming VO435 | Avgas |  |  |  |  | Silencer | 3.5 | 1.4 | 75.7 | 352 | 0.086 |
| Tactic | 1.6 | 0.64 |
| Spray for weeds | Sprayer 600-gal 70-ft 125-135 HP high clearance | Diesel |  |  |  |  | Gly Star Plus | 48 | 9.6 | 18.2 | 50.9 | 0.071 |
| Spray for weeds | Sprayer 600-gal 70-ft 125-135 HP high clearance | Diesel |  |  |  |  | Roundup RT3 | 48 | 9.6 | 18.2 | 50.9 | 0.071 |
| Gunsmoke | 3.2 | 0.64 |

Table S11: Average input field activities for rotation RTF-WW (RTF-WW-RTF-WO) on the basis of per acre per year

| **RTF Field Practices** | **Powered Equipment** | **Fuel** | **Implement** | **Seed Rate (lb/ac)** | **N (lb/ac)** | **S (lb/ac)** | **Pesticide** | **oz/ac** | **Avg**  **oz/ac** | **Fuel Usage (liters/hour)** | **Field Rate (acres/hour)** | **Avg. fuel use (liters/acre)** |
| --- | --- | --- | --- | --- | --- | --- | --- | --- | --- | --- | --- | --- |
| Conservation tillage | Tractor - 4WD 475 HP | Diesel | 30-ft wide blade sweep |  |  |  |  |  |  | 71 | 12.78 | 5.555 |
| Flail mow | Tractor - 4WD 475 HP | Diesel | Rears 30-ft flail chopper |  |  |  |  |  |  | 71 | 12.78 | 1.111 |
| Post-harvest spray | Sprayer 600-gal 70-ft 125-135 HP high clearance | Diesel |  |  |  |  | Roundup Power Max | 64 | 12.8 | 18.2 | 50.9 | 0.071 |
| Post-harvest spray | Sprayer 600-gal 70-ft 125-135 HP high clearance | Diesel |  |  |  |  | Paraquat Concentrate | 51 | 10.2 | 18.2 | 50.9 | 0.071 |
| Post-harvest spray | Sprayer 600-gal 70-ft 125-135 HP high clearance | Diesel |  |  |  |  | Paraquat Concentrate | 60 | 12 | 18.2 | 50.9 | 0.071 |
| Post-harvest spray | Bell 47 helicopter, Lycoming VO435 | Avgas |  |  |  |  | Cyclone (generic Paraquate) | 64 | 25.6 | 18.2 | 50.9 | 0.143 |
| Pre-plant herbicide application | Sprayer 600-gal 70-ft 125-135 HP high clearance | Diesel |  |  |  |  | Roundup Power Max | 64 | 12.8 | 18.2 | 50.9 | 0.071 |
| Spray for insects | Bell 47 helicopter, Lycoming VO435 | Avgas |  |  |  |  | Silencer | 3.5 | 1.4 | 75.7 | 352 | 0.086 |
| Tactic | 1.6 | 0.64 |
| Spray for weeds | Sprayer 600-gal 70-ft 125-135 HP high clearance | Diesel |  |  |  |  | Roundup Power Max | 64 | 12.8 | 18.2 | 50.9 | 0.071 |
| Spray for weeds | Sprayer 600-gal 70-ft 125-135 HP high clearance | Diesel |  |  |  |  | Roundup Power Max | 32 | 6.4 | 18.2 | 50.9 | 0.071 |
| Spray for weeds | Sprayer 600-gal 70-ft 125-135 HP high clearance | Diesel |  |  |  |  | Roundup RT3 | 48 | 9.6 | 18.2 | 50.9 | 0.071 |
| Gunsmoke | 3.2 | 0.64 |
| Spray for weeds | Sprayer 600-gal 70-ft 125-135 HP high clearance | Diesel |  |  |  |  | Roundup RT3 | 64 | 12.8 | 18.2 | 50.9 | 0.071 |
| Affinity BroadSpec | 0.5 | 0.1 |
| Liberate | 6.4 | 1.28 |
| Spray for weeds | Sprayer 600-gal 70-ft 125-135 HP high clearance | Diesel |  |  |  |  | Roundup RT3 | 64 | **25.6** | 18.2 | 50.9 | 0.143 |
| Spray for weeds | Sprayer 600-gal 70-ft 125-135 HP high clearance | Diesel |  |  |  |  | Gly Star Plus | 48 | 9.6 | 18.2 | 50.9 | 0.071 |
| Spray for weeds | Sprayer 600-gal 70-ft 125-135 HP high clearance | Diesel |  |  |  |  | Roundup RT3 | 32 | **6.4** | 18.2 | 50.9 | 0.071 |
| Choice | 6.4 | 1.28 |
| Liberate | 6.4 | 1.28 |
| Unfoamer | 0.8 | 0.16 |
| Spray for weeds | Sprayer 600-gal 70-ft 125-135 HP high clearance | Diesel |  |  |  |  | Roundup RT3 | 44 | **8.8** | 18.2 | 50.9 | 0.071 |
| Rifle | 12 | 2.4 |
| Gunsmoke | 6.4 | 1.28 |
| Liberate | 6.4 | 1.28 |
| Unfoamer | 1 | 0.2 |

| **WW Field Practices** | **Powered Equipment** | **Fuel** | **Implement** | **Seed Rate (lb/ac)** | **N (lb/ac)** | **S (lb/ac)** | **Pesticide** | **oz/ac** | **Avg**  **oz/ac** | **Fuel Usage (liters/hour)** | **Field Rate (acres/hour)** | **Avg. fuel use (liters/acre)** |
| --- | --- | --- | --- | --- | --- | --- | --- | --- | --- | --- | --- | --- |
| Spray for weeds | Sprayer 600-gal 70-ft 125-135 HP high clearance | Diesel |  |  |  |  | Vendetta | 32 | 6.4 | 18.2 | 50.9 | 0.071 |
| Harmony Extra | 0.5 | 0.1 |
| Flail mow | Tractor - 4WD 475 HP | Diesel | Rears 30-ft flail chopper |  |  |  |  |  |  | 71 | 12.78 | 1.111 |
| Harvest | Combine 350 hp |  |  |  |  |  |  |  |  | 56 | 10.67 | 5.248 |
| Post-harvest spray | Sprayer 600-gal 70-ft 125-135 HP high clearance | Diesel |  |  |  |  | Roundup Power Max | 64 | 12.8 | 18.2 | 50.9 | 0.071 |
| Post-harvest spray | Sprayer 600-gal 70-ft 125-135 HP high clearance | Diesel |  |  |  |  | Paraquat Concentrate | 51 | 10.2 | 18.2 | 50.9 | 0.071 |
| Post-harvest spray | Sprayer 600-gal 70-ft 125-135 HP high clearance | Diesel |  |  |  |  | Paraquat Concentrate | 60 | 12 | 18.2 | 50.9 | 0.071 |
| Post-harvest spray | Bell 47 helicopter, Lycoming VO435 | Avgas |  |  |  |  | Cyclone (generic Paraquate) | 64 | 25.6 | 18.2 | 50.9 | 0.143 |
| Pre-plant herbicide application | Sprayer 600-gal 70-ft 125-135 HP high clearance | Diesel |  |  |  |  | Roundup Power Max | 64 | 12.8 | 18.2 | 50.9 | 0.071 |
| Seeding winter wheat | Tractor - 4WD 475 HP | Diesel | 55-ft air drill with packer wheels | 114.75 | 55 | 11 |  |  |  | 71 | 20 | 3.550 |
| Spray for insects | Bell 47 helicopter, Lycoming VO435 | Avgas |  |  |  |  | Silencer | 3.5 | 1.4 | 75.7 | 352 | 0.086 |
| Tactic | 1.6 | 0.64 |
| Spray for weeds | Sprayer 600-gal 70-ft 125-135 HP high clearance | Diesel |  |  |  |  | Huskie | 14 | 2.8 | 18.2 | 50.9 | 0.071 |
| AffinityBroad Spec | 0.5 | 0.1 |
| Osprey | 4.75 | 0.95 |
| Fitness | 6 | 1.2 |
| Liberate | 3.2 | 0.64 |
| Spray for weeds | Sprayer 600-gal 70-ft 125-135 HP high clearance | Diesel |  |  |  |  | Huskie | 14 | 2.8 | 18.2 | 50.9 | 0.071 |
| Osprey | 4.75 | 0.95 |
| Liberate | 6.4 | 1.28 |
| Unfoamer | 1.2 | 0.24 |
| Solution 32 | 64 | 12.8 |
| Post-harvest spray | Sprayer 600-gal 70-ft 125-135 HP high clearance | Diesel |  |  |  |  | Gramoxone | 64 | 12.8 | 18.2 | 50.9 | 0.071 |
| Gunsmoke | 9.6 | 1.92 |
| Liberate | 9.6 | 1.92 |
| Unfoamer | 1.5 | 0.3 |

Table S12: Average input field activities for rotation RTF-WW-SB on the basis of per acre per year

| **RTF Field Practices** | **Powered Equipment** | **Fuel** | **Implement** | **Pesticide** | **oz/ac** | **Avg**  **oz/ac** | **Fuel Usage (liters/hour)** | **Field Rate (acres/hour)** | **Avg. fuel use (liters/acre)** |
| --- | --- | --- | --- | --- | --- | --- | --- | --- | --- |
| Conservation tillage | Tractor - 4WD 475 HP | Diesel | 30-ft wide blade sweep |  |  |  | 71 | 12.78 | 5.555 |
| Flail mow | Tractor - 4WD 475 HP | Diesel | Rears 30-ft flail chopper |  |  |  | 71 | 12.78 | 1.111 |
| Post-harvest spray | Sprayer 600-gal 70-ft 125-135 HP high clearance | Diesel |  | Roundup Power Max | 64 | 12.8 | 18.2 | 50.9 | 0.071 |
| Post-harvest spray | Sprayer 600-gal 70-ft 125-135 HP high clearance | Diesel |  | Paraquat Concentrate | 51 | 10.2 | 18.2 | 50.9 | 0.071 |
| Post-harvest spray | Sprayer 600-gal 70-ft 125-135 HP high clearance | Diesel |  | Paraquat Concentrate | 60 | 12 | 18.2 | 50.9 | 0.071 |
| Post-harvest spray | Bell 47 helicopter, Lycoming VO435 | Avgas |  | Cyclone (generic Paraquate) | 64 | 25.6 | 18.2 | 50.9 | 0.143 |
| Pre-plant herbicide | Sprayer 600-gal 70-ft 125-135 HP high clearance | Diesel |  | Roundup Power Max | 64 | 12.8 | 18.2 | 50.9 | 0.071 |
| Spray for insects | Bell 47 helicopter, Lycoming VO435 | Avgas |  | Silencer | 3.5 | 1.4 | 75.7 | 352 | 0.086 |
| Tactic | 1.6 | 0.64 |
| Spray for weeds | Sprayer 600-gal 70-ft 125-135 HP high clearance | Diesel |  | Roundup Power Max | 64 | 12.8 | 18.2 | 50.9 | 0.071 |
| Spray for weeds | Sprayer 600-gal 70-ft 125-135 HP high clearance | Diesel |  | Roundup Power Max | 32 | 6.4 | 18.2 | 50.9 | 0.071 |
| Spray for weeds | Sprayer 600-gal 70-ft 125-135 HP high clearance | Diesel |  | Gly Star Plus | 48 | 9.6 | 18.2 | 50.9 | 0.071 |
| Spray for weeds | Sprayer 600-gal 70-ft 125-135 HP high clearance | Diesel |  | Roundup RT3 | 64 | 25.6 | 18.2 | 50.9 | 0.143 |
| Spray for weeds | Sprayer 600-gal 70-ft 125-135 HP high clearance | Diesel |  | Roundup RT3 | 48 | 9.6 | 18.2 | 50.9 | 0.071 |
| Gunsmoke | 3.2 | 0.64 |
| Spray for weeds | Sprayer 600-gal 70-ft 125-135 HP high clearance | Diesel |  | Roundup RT3 | 64 | 12.8 | 18.2 | 50.9 | 0.071 |
| Affinity BroadSpec | 0.5 | 0.1 |
| Liberate | 6.4 | 1.28 |
| Spray for weeds | Sprayer 600-gal 70-ft 125-135 HP high clearance | Diesel |  | Roundup RT3 | 32 | 6.4 | 18.2 | 50.9 | 0.071 |
| Choice | 6.4 | 1.28 |
| Liberate | 6.4 | 1.28 |
| Unfoamer | 0.8 | 0.16 |
| Spray for weeds | Sprayer 600-gal 70-ft 125-135 HP high clearance | Diesel |  | Roundup RT3 | 44 | 8.8 | 18.2 | 50.9 | 0.071 |
| Rifle | 12 | 2.4 |
| Gunsmoke | 6.4 | 1.28 |
| Liberate | 6.4 | 1.28 |
| Unfoamer | 1 | 0.2 |

| **WW Field Practices** | **Powered Equipment** | **Fuel** | **Implement** | **Seed rate (lb/ac)** | **N (lb/ac)** | **S (lb/ac)** | **Pesticides** | **oz/ac** | **Avg**  **oz/ac** | **Fuel Usage (liters/hour)** | **Field Rate (acres/hour)** | **Avg. fuel use (liters/acre)** |
| --- | --- | --- | --- | --- | --- | --- | --- | --- | --- | --- | --- | --- |
| Flail mow | Tractor - 4WD 475 HP | Diesel | Rears 30-ft flail chopper |  |  |  |  |  |  | 71 | 12.78 | 1.111 |
| Harvest | Combine 350 hp | Diesel |  |  |  |  |  |  |  | 56 | 10.67 | 5.248 |
| Post-harvest spray | Sprayer 600-gal 70-ft 125-135 HP high clearance | Diesel |  |  |  |  | Roundup Power Max | 64 | 12.8 | 18.2 | 50.9 | 0.071 |
| Post-harvest spray | Sprayer 600-gal 70-ft 125-135 HP high clearance | Diesel |  |  |  |  | Paraquat Concentrate | 51 | 10.2 | 18.2 | 50.9 | 0.071 |
| Post-harvest spray | Sprayer 600-gal 70-ft 125-135 HP high clearance | Diesel |  |  |  |  | Paraquat Concentrate | 60 | 12 | 18.2 | 50.9 | 0.071 |
| Post-harvest spray | Bell 47 helicopter, Lycoming VO435 | Avgas |  |  |  |  | Cyclone (generic Paraquate) | 64 | 25.6 | 18.2 | 50.9 | 0.143 |
| Post-harvest spray | Sprayer 600-gal 70-ft 125-135 HP high clearance | Diesel |  |  |  |  | Gramoxone | 64 | 12.8 | 18.2 | 50.9 | 0.071 |
| Gunsmoke | 9.6 | 1.92 |
| Liberate | 9.6 | 1.92 |
| Unfoamer | 1.5 | 0.3 |
| Pre-plant herbicide application | Sprayer 600-gal 70-ft 125-135 HP high clearance | Diesel |  |  |  |  | Roundup Power Max | 64 | 12.8 | 18.2 | 50.9 | 0.071 |
| Seeding winter wheat | Tractor - 4WD 475 HP | Diesel | 55-ft air drill with packer | 114.75 | 55 | 11 |  |  |  | 71 | 20 | 3.55 |
| Spray for insects | Bell 47 helicopter, Lycoming VO435 | Avgas |  |  |  |  | Silencer | 3.5 | 1.4 | 75.7 | 352 | 0.086 |
| Tactic | 1.6 | 0.64 |
| Spray for weeds | Sprayer 600-gal 70-ft 125-135 HP high clearance | Diesel |  |  |  |  | Vendetta | 32 | 6.4 | 18.2 | 50.9 | 0.071 |
| Harmony Extra | 0.5 | 0.1 |
| Spray for weeds | Sprayer 600-gal 70-ft 125-135 HP high clearance | Diesel |  |  |  |  | Huskie | 14 | 2.8 | 18.2 | 50.9 | 0.071 |
| AffinityBroad Spec | 0.5 | 0.1 |
| Osprey | 4.75 | 0.95 |
| Fitness | 6 | 1.2 |
| Liberate | 3.2 | 0.64 |
| Spray for weeds | Sprayer 600-gal 70-ft 125-135 HP high clearance | Diesel |  |  |  |  | Huskie | 14 | 2.8 | 18.2 | 50.9 | 0.071 |
| Osprey | 4.75 | 0.95 |
| Liberate | 6.4 | 1.28 |
| Unfoamer | 1.2 | 0.24 |
| Solution 32 | 64 | 12.8 |

| **SB Field Practices** | **Powered Equipment** | **Fuel** | **Implement** | **Seed rate (lb/ac)** | **N**  **(lb/ac)** | **S**  **(lb/ac)** | **Pesticide** | **oz/ac** | **Avg**  **oz/ac** | **Fuel Usage (liters/hour)** | **Field Rate (acres/hour)** | **Avg. fuel use (liters/acre)** |
| --- | --- | --- | --- | --- | --- | --- | --- | --- | --- | --- | --- | --- |
| Flail mow | Tractor - 4WD 475 HP | Diesel | Rears 30-ft flail chopper |  |  |  |  |  |  | 71 | 12.78 | 1.111 |
| Harvest | Combine 350 hp | Diesel |  |  |  |  |  |  |  | 56 | 10.67 | 5.248 |
| Post-harvest spray | Sprayer 600-gal 70-ft 125-135 HP high clearance | Diesel |  |  |  |  | Roundup Power Max | 64 | 12.8 | 18.2 | 50.9 | 0.071 |
| Post-harvest spray | Sprayer 600-gal 70-ft 125-135 HP high clearance | Diesel |  |  |  |  | Paraquat Concentrate | 51 | 10.2 | 18.2 | 50.9 | 0.071 |
| Post-harvest spray | Sprayer 600-gal 70-ft 125-135 HP high clearance | Diesel |  |  |  |  | Paraquat Concentrate | 60 | 12 | 18.2 | 50.9 | 0.071 |
| Post-harvest spray | Bell 47 helicopter, Lycoming VO435 | Avgas |  |  |  |  | Cyclone (generic Paraquate) | 64 | 25.6 | 18.2 | 50.9 | 0.143 |
| Post-harvest spray | Sprayer 600-gal 70-ft 125-135 HP high clearance | Diesel |  |  |  |  | Gramoxone | 64 | 12.8 | 18.2 | 50.9 | 0.071 |
| Gunsmoke | 9.6 | 1.92 |
| Liberate | 9.6 | 1.92 |
| Unfoamer | 1.5 | 0.3 |
| Pre-plant herbicide application | Sprayer 600-gal 70-ft 125-135 HP high clearance | Diesel | **N/a** |  |  |  | Roundup Power Max | 28 | 5.6 | 18.2 | 50.9 | 0.071 |
| Pre-plant herbicide application | Sprayer 600-gal 70-ft 125-135 HP high clearance | Diesel |  |  |  |  | Roundup Power Max | 64 | 12.8 | 18.2 | 50.9 | 0.071 |
| Seeding spring barley  Spray for insects | Tractor - 4WD 475 HP  Bell 47 helicopter, Lycoming VO435 | Diesel | 55-ft air drill with packer wheels | 109.2 | 55 | 11 |  |  |  | 71 | 20 | 3.55 |
| Avgas |  |  |  |  | Silencer | 3.5 | 1.4 | 75.7 | 352 | 0.086 |
|  |  |  |  | Tactic | 1.6 | 0.64 |
| Spray for weeds | Sprayer 600-gal 70-ft 125-135 HP high clearance | Diesel |  |  |  |  | Brox-M | 16 | 3.2 | 18.2 | 50.9 | 0.071 |
|  |  |  |  | Affinity Broadspec | 0.6 | 0.12 |
| Spray for weeds | Sprayer 600-gal 70-ft 125-135 HP high clearance | Diesel |  |  |  |  | Vendetta | 25 | 5 | 18.2 | 50.9 | 0.071 |
|  |  |  |  | Harmony Extra | 0.5 | 0.1 |
| Spray for weeds | Sprayer 600-gal 70-ft 125-135 HP high clearance | Diesel |  |  |  |  | Roundup RT3 | 48 | 9.6 | 18.2 | 50.9 | 0.071 |
|  |  |  |  | Gunsmoke | 3.2 | 0.64 |
| Spray for weeds | Sprayer 600-gal 70-ft 125-135 HP high clearance | Diesel |  |  |  |  | Roundup RT3 | 32 | 6.4 | 18.2 | 50.9 | 0.071 |
|  |  |  |  | Choice | 6.4 | 1.28 |
|  |  |  |  | Liberate | 6.4 | 1.28 |
|  |  |  |  | Unfoamer | 0.8 | 0.16 |
| Spray for weeds | Sprayer 600-gal 70-ft 125-135 HP high clearance | Diesel |  |  |  |  | Huskie | 15 | 3 | 18.2 | 50.9 | 0.071 |
|  |  |  |  | Liberate | 6.4 | 1.28 |
|  |  |  |  | Unfoamer | 1 | 0.2 |

Table S13: Average input field activities for rotation RTF-WW-SO on the basis of per acre per year

| **RTF Field Practices** | **Powered Equipment** | **Fuel** | **Implement** | Pesticide | oz/ac | **Avg**  **oz/ac** | **Fuel Usage (liters/hour)** | **Field Rate (acres/hour)** | **Avg. fuel use (liters/acre)** |
| --- | --- | --- | --- | --- | --- | --- | --- | --- | --- |
| Conservation tillage | Tractor - 4WD 475 HP | Diesel | 30-ft wide blade sweep |  |  |  | 71 | 12.78 | 5.555 |
| Flail mow | Tractor - 4WD 475 HP | Diesel | Rears 30-ft flail chopper |  |  |  | 71 | 12.78 | 1.111 |
| Post-harvest spray | Sprayer 600-gal 70-ft 125-135 HP high clearance | Diesel |  | Roundup Power Max | 64 | 12.8 | 18.2 | 50.9 | 0.071 |
| Post-harvest spray | Sprayer 600-gal 70-ft 125-135 HP high clearance | Diesel |  | Paraquat Concentrate | 51 | 10.2 | 18.2 | 50.9 | 0.071 |
| Post-harvest spray | Sprayer 600-gal 70-ft 125-135 HP high clearance | Diesel |  | Paraquat Concentrate | 60 | 12 | 18.2 | 50.9 | 0.071 |
| Post-harvest spray | Bell 47 helicopter, Lycoming VO435 | Avgas |  | Cyclone (generic Paraquate) | 64 | 25.6 | 18.2 | 50.9 | 0.143 |
| Pre-plant herbicide application | Sprayer 600-gal 70-ft 125-135 HP high clearance | Diesel |  | Roundup Power Max | 64 | 12.8 | 18.2 | 50.9 | 0.071 |
| Spray for insects | Bell 47 helicopter, Lycoming VO435 | Avgas |  | Silencer | 3.5 | 1.4 | 75.7 | 352 | 0.086 |
|  | Tactic | 1.6 | 0.64 |
| Spray for weeds | Sprayer 600-gal 70-ft 125-135 HP high clearance | Diesel |  | Roundup Power Max | 64 | 12.8 | 18.2 | 50.9 | 0.071 |
| Spray for weeds | Sprayer 600-gal 70-ft 125-135 HP high clearance | Diesel |  | Roundup Power Max | 32 | 6.4 | 18.2 | 50.9 | 0.071 |
| Spray for weeds | Sprayer 600-gal 70-ft 125-135 HP high clearance | Diesel |  | Gly Star Plus | 48 | 9.6 | 18.2 | 50.9 | 0.071 |
| Spray for weeds | Sprayer 600-gal 70-ft 125-135 HP high clearance | Diesel |  | Roundup RT3 | 64 | 25.6 | 18.2 | 50.9 | 0.143 |
| Spray for weeds | Sprayer 600-gal 70-ft 125-135 HP high clearance | Diesel |  | Roundup RT3 | 48 | 9.6 | 18.2 | 50.9 | 0.071 |
| Gunsmoke | 3.2 | 0.64 |
| Spray for weeds | Sprayer 600-gal 70-ft 125-135 HP high clearance | Diesel |  | Roundup RT3 | 64 | 12.8 | 18.2 | 50.9 | 0.071 |
| Affinity BroadSpec | 0.5 | 0.1 |
| Liberate | 6.4 | 1.28 |
| Spray for weeds | Sprayer 600-gal 70-ft 125-135 HP high clearance | Diesel |  | Roundup RT3 | 32 | 6.4 | 18.2 | 50.9 | 0.071 |
| Choice | 6.4 | 1.28 |
| Liberate | 6.4 | 1.28 |
|  | Unfoamer | 0.8 | 0.16 |
| Spray for weeds | Sprayer 600-gal 70-ft 125-135 HP high clearance | Diesel |  | Roundup RT3 | 44 | 8.8 | 18.2 | 50.9 | 0.071 |
| Rifle | 12 | 2.4 |
| Gunsmoke | 6.4 | 1.28 |
| Liberate | 6.4 | 1.28 |
| Unfoamer | 1 | 0.2 |

| **Practice** | **Powered Equipment** | **Fuel** | **Implement** | **Seed Rate (lb/ac)** | **N (lb/ac)** | **S (lb/ac)** | **Pesticide** | **oz/ac** | **Avg**  **oz/ac** | **Fuel Usage (liters/hour)** | **Field Rate (acres/hour)** | **Avg. fuel use (liters/acre)** |
| --- | --- | --- | --- | --- | --- | --- | --- | --- | --- | --- | --- | --- |
| **WW Field Practices** |  |  |  |  |  |  |  |  |  |  |  |  |
| Flail mow | Tractor - 4WD 475 HP | Diesel | Rears 30-ft flail chopper |  |  |  |  |  |  | 71 | 12.78 | 1.111 |
| Harvest | Combine 350 hp |  |  |  |  |  |  |  |  | 56 | 10.67 | 5.248 |
| Post-harvest spray | Sprayer 600-gal 70-ft 125-135 HP high clearance | Diesel |  |  |  |  | Roundup Power Max | 64 | 12.8 | 18.2 | 50.9 | 0.071 |
| Post-harvest spray | Sprayer 600-gal 70-ft 125-135 HP high clearance | Diesel |  |  |  |  | Paraquat Concentrate | 51 | 10.2 | 18.2 | 50.9 | 0.071 |
| Post-harvest spray | Sprayer 600-gal 70-ft 125-135 HP high clearance | Diesel |  |  |  |  | Paraquat Concentrate | 60 | 12 | 18.2 | 50.9 | 0.071 |
| Post-harvest spray | Bell 47 helicopter, Lycoming VO435 | Avgas |  |  |  |  | Cyclone (generic Paraquate) | 64 | 25.6 | 18.2 | 50.9 | 0.143 |
| Post-harvest spray | Sprayer 600-gal 70-ft 125-135 HP high clearance | Diesel |  |  |  |  | Gramoxone | 64 | 12.8 | 18.2 | 50.9 | 0.071 |
|  |  | Gunsmoke | 9.6 | 1.92 |
|  |  | Liberate | 9.6 | 1.92 |
|  |  | Unfoamer | 1.5 | 0.3 |
| Pre-plant herbicide application | Sprayer 600-gal 70-ft 125-135 HP high clearance | Diesel |  |  |  |  | Roundup Power Max | 64 | 12.8 | 18.2 | 50.9 | 0.071 |
| Seeding winter wheat | Tractor - 4WD 475 HP | Diesel | 55-ft air drill with packer wheels | 114.75 | 55 | 11 |  |  |  | 71 | 20 | 3.550 |
| Spray for insects | Bell 47 helicopter, Lycoming VO435 | Avgas |  |  |  |  | Silencer | 3.5 | 1.4 | 75.7 | 352 | 0.086 |
|  |  | Tactic | 1.6 | 0.64 |
| Spray for weeds | Sprayer 600-gal 70-ft 125-135 HP high clearance | Diesel |  |  |  |  | Vendetta | 32 | 6.4 | 18.2 | 50.9 | 0.071 |
|  |  | Harmony Extra | 0.5 | 0.1 |
| Spray for weeds | Sprayer 600-gal 70-ft 125-135 HP high clearance | Diesel |  |  |  |  | Huskie | 14 | 2.8 | 18.2 | 50.9 | 0.071 |
| AffinityBroad Spec | 0.5 | 0.1 |
| Osprey | 4.75 | 0.95 |
| Fitness | 6 | 1.2 |
| Liberate | 3.2 | 0.64 |
| Spray for weeds | Sprayer 600-gal 70-ft 125-135 HP high clearance | Diesel |  |  |  |  | Huskie | 14 | 2.8 | 18.2 | 50.9 | 0.071 |
| Osprey | 4.75 | 0.95 |
| Liberate | 6.4 | 1.28 |
| Unfoamer | 1.2 | 0.24 |
| Solution 32 | 64 | 12.8 |

| **SO, Field Practices** | **Powered Equipment** | **Fuel** | **Implement** | **Seed Rate (lb/ac)** | **N (lb/ac)** | **S (lb/ac)** | **Pesticide** | **oz/ac** | **Avg**  **oz/ac** | **Fuel Usage (liters/hour)** | **Field Rate (acres/hour)** | **Avg. fuel use (liters/acre)** |
| --- | --- | --- | --- | --- | --- | --- | --- | --- | --- | --- | --- | --- |
| Flail mow | Tractor - 4WD 475 HP | Diesel | Rears 30-ft flail chopper |  |  |  |  |  |  | 71 | 12.78 | 1.111 |
| Harvest | Combine 350 hp |  |  |  |  |  |  |  |  | 56 | 10.67 | 5.248 |
| Post-harvest spray | Sprayer 600-gal 70-ft 125-135 HP high clearance | Diesel |  |  |  |  | Roundup Power Max | 64 | 12.8 | 18.2 | 50.9 | 0.071 |
| Post-harvest spray | Sprayer 600-gal 70-ft 125-135 HP high clearance | Diesel |  |  |  |  | Paraquat Concentrate | 51 | 10.2 | 18.2 | 50.9 | 0.071 |
| Post-harvest spray | Sprayer 600-gal 70-ft 125-135 HP high clearance | Diesel |  |  |  |  | Paraquat Concentrate | 60 | 12 | 18.2 | 50.9 | 0.071 |
| Post-harvest spray | Bell 47 helicopter, Lycoming VO435 | Avgas |  |  |  |  | Cyclone (generic Paraquate) | 64 | 25.6 | 18.2 | 50.9 | 0.143 |
| Pre-plant herbicide application | Sprayer 600-gal 70-ft 125-135 HP high clearance | Diesel | n/a |  |  |  | Roundup Power Max | 28 | 5.6 | 18.2 | 50.9 | 0.071 |
| Pre-plant herbicide application | Sprayer 600-gal 70-ft 125-135 HP high clearance | Diesel |  |  |  |  | Roundup Power Max | 32 | 6.4 | 18.2 | 50.9 | 0.071 |
|  |  |  |  |  | Landmaster | 54 | 10.8 |
| Seeding B. carinata | Tractor - 4WD 475 HP | Diesel | 55-ft air drill with packer wheels | 5.406 | 55 | 11 |  |  |  | 71 | 20 | 3.550 |
| Spray for aphids | Bell 47 helicopter, Lycoming VO435 | Avgas |  |  |  |  | Warrior II | 1.92 | 0.768 | 75.7 | 352 | 0.086 |
| Spray for grassy weeds | Sprayer 600-gal 70-ft 125-135 HP high clearance | Diesel |  |  |  |  | Assure II | 12 | 2.4 | 18.2 | 50.9 | 0.071 |
| Spray for insects | Bell 47 helicopter, Lycoming VO435 | Avgas |  |  |  |  | Silencer | 3.5 | 1.4 | 75.7 | 352 | 0.086 |
| Tactic | 1.6 | 0.64 |
| Spray for insects | Bell 47 helicopter, Lycoming VO435 | Avgas |  |  |  |  | Lambda-CY | 3.84 | 1.536 | 75.7 | 352 | 0.086 |
|  |  | Wetcit | 5 | 2 |
| Spray for weeds | Sprayer 600-gal 70-ft 125-135 HP high clearance | Diesel |  |  |  |  | Gly Star Plus | 48 | 9.6 | 18.2 | 50.9 | 0.071 |
| Spray for weeds | Sprayer 600-gal 70-ft 125-135 HP high clearance | Diesel |  |  |  |  | Roundup RT3 | 48 | 9.6 | 18.2 | 50.9 | 0.071 |
| Gunsmoke | 3.2 | 0.64 |
| Spray for weeds | Sprayer 600-gal 70-ft 125-135 HP high clearance | Diesel |  |  |  |  | Roundup RT3 | 32 | 6.4 | 18.2 | 50.9 | 0.071 |
| Choice | 6.4 | 1.28 |
| Liberate | 6.4 | 1.28 |
| Unfoamer | 0.8 | 0.16 |
| Post-harvest spray | Sprayer 600-gal 70-ft 125-135 HP high clearance | Diesel |  |  |  |  | Gramoxone | 64 | 12.8 | 18.2 | 50.9 | 0.071 |
|  |  | Gunsmoke | 9.6 | 1.92 |
|  |  | Liberate | 9.6 | 1.92 |
|  |  | Unfoamer | 1.5 | 0.3 |

Table S14: Average input field activities for rotation RTF-WO-SW on the basis of per acre per year

| **RTF Field Practices** | **Powered Equipment** | **Fuel** | **Implement** | **Pesticide** | **oz/ac** | **Avg**  **oz/ac** | **Fuel Usage (liters/hour)** | **Field Rate (acres/hour)** | **Avg. fuel use (liters/acre)** |
| --- | --- | --- | --- | --- | --- | --- | --- | --- | --- |
| Spray for weeds | Sprayer 600-gal 70-ft 125-135 HP high clearance | Diesel |  | Roundup RT3 | 48 | 9.6 | 18.2 | 50.9 | 0.071 |
| Gunsmoke | 3.2 | 0.64 |
| Spray for weeds | Sprayer 600-gal 70-ft 125-135 HP high clearance | Diesel |  | Roundup RT3 | 64 | 12.8 | 18.2 | 50.9 | 0.071 |
| Affinity BroadSpec | 0.5 | 0.1 |
| Liberate | 6.4 | 1.28 |
| Spray for weeds | Sprayer 600-gal 70-ft 125-135 HP high clearance | Diesel |  | Roundup RT3 | 32 | 6.4 | 18.2 | 50.9 | 0.071 |
| Choice | 6.4 | 1.28 |
| Liberate | 6.4 | 1.28 |
| Unfoamer | 0.8 | 0.16 |
| Spray for weeds | Sprayer 600-gal 70-ft 125-135 HP high clearance | Diesel |  | Roundup RT3 | 44 | 8.8 | 18.2 | 50.9 | 0.071 |
| Rifle | 12 | 2.4 |
| Gunsmoke | 6.4 | 1.28 |
| Liberate | 6.4 | 1.28 |
| Unfoamer | 1 | 0.2 |
| Spray for insects | Bell 47 helicopter, Lycoming VO435 | Avgas |  | Silencer | 3.5 | 1.4 | 75.7 | 352 | 0.086 |
| Tactic | 1.6 | 0.64 |
| Conservation tillage | Tractor - 4WD 475 HP | Diesel | 30-ft wide blade sweep |  |  |  | 71 | 12.78 | 5.556 |
| Post-harvest spray | Bell 47 helicopter, Lycoming VO435 | Avgas |  | Cyclone (generic Paraquate) | 64 | 25.6 | 18.2 | 50.9 | 0.143 |
| Spray for weeds | Sprayer 600-gal 70-ft 125-135 HP high clearance | Diesel |  | Gly Star Plus | 48 | 9.6 | 18.2 | 50.9 | 0.071 |
| Spray for weeds | Sprayer 600-gal 70-ft 125-135 HP high clearance | Diesel |  | Roundup RT3 | 64 | 25.6 | 18.2 | 50.9 | 0.143 |
| Post-harvest spray | Sprayer 600-gal 70-ft 125-135 HP high clearance | Diesel |  | Paraquat Concentrate | 60 | 12 | 18.2 | 50.9 | 0.071 |
| Flail mow | Tractor - 4WD 475 HP | Diesel | Rears 30-ft flail chopper |  |  |  | 71 | 12.78 | 1.111 |
| Pre-plant herbicide application | Sprayer 600-gal 70-ft 125-135 HP high clearance | Diesel |  | Roundup Power Max | 64 | 12.8 | 18.2 | 50.9 | 0.071 |
| Spray for weeds | Sprayer 600-gal 70-ft 125-135 HP high clearance | Diesel |  | Roundup Power Max | 32 | 6.4 | 18.2 | 50.9 | 0.071 |
| Post-harvest spray | Sprayer 600-gal 70-ft 125-135 HP high clearance | Diesel |  | Paraquat Concentrate | 51 | 10.2 | 18.2 | 50.9 | 0.071 |
| Spray for weeds | Sprayer 600-gal 70-ft 125-135 HP high clearance | Diesel |  | Roundup Power Max | 64 | 12.8 | 18.2 | 50.9 | 0.071 |
| Post-harvest spray | Sprayer 600-gal 70-ft 125-135 HP high clearance | Diesel |  | Roundup Power Max | 64 | 12.8 | 18.2 | 50.9 | 0.071 |

| **WO Field Practices** | **Powered equipment** | **Fuel** | **Implement** | **Seed Rate (lb/ac)** | **N (lb/ac)** | **S (lb/ac)** | **Pesticide** | **oz/ac** | **Avg**  **oz/ac** | **Fuel Usage (liters/hour)** | **Field Rate (acres/hour)** | **Avg. fuel use (liters/acre)** |
| --- | --- | --- | --- | --- | --- | --- | --- | --- | --- | --- | --- | --- |
| Spray for weeds | Sprayer 600-gal 70-ft 125-135 HP high clearance | Diesel |  |  |  |  | Roundup RT3 | 48 | 9.6 | 18.2 | 50.9 | 0.071 |
| Gunsmoke | 3.2 | 0.64 |
| Spray for insects | Bell 47 helicopter, Lycoming VO435 | Avgas |  |  |  |  | Silencer | 3.5 | 1.4 | 75.7 | 352 | 0.086 |
| Tactic | 1.6 | 0.64 |
| Spray for insects | Bell 47 helicopter, Lycoming VO435 | Avgas |  |  |  |  | Lambda-CY | 3.84 | 1.536 | 75.7 | 352 | 0.086 |
| Wetcit | 5 | 2 |
| Harvest | Combine 350 hp | Diesel |  |  |  |  |  |  | 0 | 56 | 10.67 | 5.248 |
| Post-harvest spray | Bell 47 helicopter, Lycoming VO435 | **Avgas** |  |  |  |  | Cyclone (generic Paraquate) | 64 | 25.6 | 18.2 | 50.9 | 0.143 |
| Post-harvest spray | Sprayer 600-gal 70-ft 125-135 HP high clearance | Diesel |  |  |  |  | Gramoxone | 64 | 12.8 | 18.2 | 50.9 | 0.072 |
| Gunsmoke | 9.6 | 1.92 |
| Liberate | 9.6 | 1.92 |
| Unfoamer | 1.5 | 0.3 |
| Spray for weeds | Sprayer 600-gal 70-ft 125-135 HP high clearance | Diesel |  |  |  |  | Gly Star Plus | 48 | 9.6 | 18.2 | 50.9 | 0.072 |
| Post-harvest spray | Sprayer 600-gal 70-ft 125-135 HP high clearance | Diesel |  |  |  |  | Paraquat Concentrate | 60 | 12 | 18.2 | 50.9 | 0.072 |
| Flail mow | Tractor - 4WD 475 HP | Diesel | Rears 30-ft flail chopper |  |  |  |  |  | 0 | 71 | 12.78 | 1.111 |
| Seeding winter canola | Tractor - 4WD 475 HP | Diesel | 55-ft air drill with packer wheels | 5.083 | 55 | 11 |  |  | 0 | 71 | 20 | 3.550 |

| **SW Field Practice** | **Powered equipment** | **Fuel** | **Implement** | **Seed Rate (lb/ac)** | **N (lb/ac)** | **S (lb/ac)** | **Pesticide** | **oz/ac** | **Avg**  **oz/ac** | **Fuel Usage (liters/hour)** | **Field Rate (acres/hour)** | **Avg. fuel use (liters/acre)** |
| --- | --- | --- | --- | --- | --- | --- | --- | --- | --- | --- | --- | --- |
| Seeding spring wheat | Tractor - 4WD 475 HP | Diesel | 55-ft air drill with packer wheels | 117.6 | 55 | 11 |  |  |  | 71 | 20 | 3.550 |
| Spray for weeds | Sprayer 600-gal 70-ft 125-135 HP high clearance | Diesel |  |  |  |  | Roundup RT3 | 48 | 9.6 | 18.2 | 50.9 | 0.071 |
| Gunsmoke | 3.2 | 0.64 |
| Spray for insects | Bell 47 helicopter, Lycoming VO435 | Avgas |  |  |  |  | Silencer | 3.5 | 1.4 | 75.7 | 352 | 0.086 |
|  | Tactic | 1.6 | 0.64 |
| Harvest | Combine 350 hp | Diesel |  |  |  |  |  |  | 0 | 56 | 10.67 | 5.248 |
| Post-harvest spray | Bell 47 helicopter, Lycoming VO435 | Avgas |  |  |  |  | Cyclone (generic Paraquate) | 64 | 25.6 | 18.2 | 50.9 | 0.143 |
| Spray for weeds | Sprayer 600-gal 70-ft 125-135 HP high clearance | Diesel |  |  |  |  | Vendetta | 25 | 5 | 18.2 | 50.9 | 0.071 |
| Harmony Extra | 0.5 | 0.1 |
| Post-harvest spray | Sprayer 600-gal 70-ft 125-135 HP high clearance | Diesel |  |  |  |  | Paraquat Concentrate | 60 | 12 | 18.2 | 50.9 | 0.071 |
| Flail mow |  | Diesel |  |  |  |  |  |  | 0 | 71 | 12.78 | 1.111 |
| Pre-plant herbicide application | Sprayer 600-gal 70-ft 125-135 HP high clearance | Diesel |  |  |  |  | Roundup Power Max | 64 | 12.8 | 18.2 | 50.9 | 0.071 |
| Spray for weeds | Sprayer 600-gal 70-ft 125-135 HP high clearance | Diesel |  |  |  |  | Brox-M | 16 | 3.2 | 18.2 | 50.9 | 0.071 |
| Affinity Broadspec | 0.6 | 0.12 |
| Spray for weeds | Sprayer 600-gal 70-ft 125-135 HP high clearance | Diesel |  |  |  |  | Roundup RT3 | 32 | 6.4 | 18.2 | 50.9 | 0.071 |
| Choice | 6.4 | 1.28 |
| Liberate | 6.4 | 1.28 |
| Unfoamer | 0.8 | 0.16 |
| Spray for weeds | Sprayer 600-gal 70-ft 125-135 HP high clearance | Diesel |  |  |  |  | Huskie | 15 | 3 | 18.2 | 50.9 | 0.071 |
| Liberate | 6.4 | 1.28 |
| Unfoamer | 1 | 0.2 |
| Post-harvest spray | Sprayer 600-gal 70-ft 125-135 HP high clearance | Diesel |  |  |  |  | Paraquat Concentrate | 51 | 10.2 | 18.2 | 50.9 | 0.071 |
| Pre-plant herbicide application | Sprayer 600-gal 70-ft 125-135 HP high clearance | Diesel |  |  |  |  | Roundup Power Max | 28 | 5.6 | 18.2 | 50.9 | 0.071 |
| Post-harvest spray | Sprayer 600-gal 70-ft 125-135 HP high clearance | Diesel |  |  |  |  | Roundup Power Max | 64 | 12.8 | 18.2 | 50.9 | 0.071 |
| Post-harvest spray | Sprayer 600-gal 70-ft 125-135 HP high clearance | Diesel |  |  |  |  | Gramoxone | 64 | 12.8 | 18.2 | 50.9 | 0.071 |
| Gunsmoke | 9.6 | 1.92 |
| Liberate | 9.6 | 1.92 |
| Unfoamer | 1.5 | **0.3** |

Table S15: Average input field activities for rotation RTF-SO-SW on the basis of per acre per year

| **RTF Field Practice** | **Equipment** | **Fuel** | **Implement** | **Seed Rate (lb/ac)** | **N (lb/ac)** | **S (lb/ac)** | **Pesticide** | **oz/ac** | **Avg**  **oz/ac** | **Fuel Usage (liters/hour)** | **Field Rate (acres/hour)** | **Avg. fuel use (liters/acre)** |
| --- | --- | --- | --- | --- | --- | --- | --- | --- | --- | --- | --- | --- |
| Spray for weeds | Sprayer 600-gal 70-ft 125-135 HP high clearance | Diesel |  |  |  |  | Roundup Power Max | 64 | 12.8 | 18.2 | 50.9 | 0.071 |
| Conservation tillage | Tractor - 4WD 475 HP | Diesel | 30-ft wide blade sweep |  |  |  |  |  |  | 71 | 12.78 | 5.556 |
| Post-harvest spray | Sprayer 600-gal 70-ft 125-135 HP high clearance | Diesel |  |  |  |  | Roundup Power Max | 64 | 12.8 | 18.2 | 50.9 | 0.071 |
| Pre-plant herbicide application | Sprayer 600-gal 70-ft 125-135 HP high clearance | Diesel |  |  |  |  | Roundup Power Max | 64 | 12.8 | 18.2 | 50.9 | 0.071 |
| Spray for weeds | Sprayer 600-gal 70-ft 125-135 HP high clearance | Diesel |  |  |  |  | Roundup Power Max | 32 | 6.4 | 18.2 | 50.9 | 0.071 |
| Post-harvest spray | Sprayer 600-gal 70-ft 125-135 HP high clearance | Diesel |  |  |  |  | Paraquat Concentrate | 51 | 10.2 | 18.2 | 50.9 | 0.071 |
| Spray for weeds | Sprayer 600-gal 70-ft 125-135 HP high clearance | Diesel |  |  |  |  | Gly Star Plus | 48 | 9.6 | 18.2 | 50.9 | 0.071 |
| Spray for weeds | Sprayer 600-gal 70-ft 125-135 HP high clearance | Diesel |  |  |  |  | Roundup RT3 | 64 | 25.6 | 18.2 | 50.9 | 0.143 |
| Post-harvest spray | Sprayer 600-gal 70-ft 125-135 HP high clearance | Diesel |  |  |  |  | Paraquat Concentrate | 60 | 12 | 18.2 | 50.9 | 0.071 |
| Flail mow | Tractor - 4WD 475 HP | Diesel | Rears 30-ft flail chopper |  |  |  |  |  |  | 71 | 12.78 | 1.111 |
| Spray for weeds | Sprayer 600-gal 70-ft 125-135 HP high clearance | Diesel |  |  |  |  | Roundup RT3 | 48 | 9.6 | 18.2 | 50.9 | 0.071 |
| Gunsmoke | 3.2 | 0.64 |
| Spray for weeds | Sprayer 600-gal 70-ft 125-135 HP high clearance | Diesel |  |  |  |  | Roundup RT3 | 64 | 12.8 | 18.2 | 50.9 | 0.071 |
| Affinity BroadSpec | 0.5 | 0.1 |
| Liberate | 6.4 | 1.28 |
| Spray for weeds | Sprayer 600-gal 70-ft 125-135 HP high clearance | Diesel |  |  |  |  | Roundup RT3 | 32 | 6.4 | 18.2 | 50.9 | 0.072 |
| Choice | 6.4 | 1.28 |
| Liberate | 6.4 | 1.28 |
| Unfoamer | 0.8 | 0.16 |
| Spray for weeds | Sprayer 600-gal 70-ft 125-135 HP high clearance | Diesel |  |  |  |  | Roundup RT3 | 12 | 2.4 | 18.2 | 50.9 | 0.071 |
| Rifle | 12 | 2.4 |
| Gunsmoke | 6.4 | 1.28 |
| Liberate | 6.4 | 1.28 |
| Unfoamer | 1 | 0.2 |
| Spray for insects | Bell 47 helicopter, Lycoming VO435 | Avgas |  |  |  |  | Silencer | 3.5 | 1.4 | 75.7 | 352 | 0.086 |
|  |  | Tactic | 1.6 | 0.64 |
| Post-harvest spray | Bell 47 helicopter, Lycoming VO435 | Avgas |  |  |  |  | Cyclone (generic Paraquate) | 64 | 25.6 | 18.2 | 50.9 | 0.143 |

| **SO Field Practice** | **Equipment** | **Fuel** | **Implement** | **Seed Rate (lb/ac)** | **N (lb/ac)** | **S (lb/ac)** | **Pesticide** | **oz/ac** | **Avg**  **oz/ac** | **Fuel Usage (liters/hour)** | **Field Rate (acres/hour)** | **Avg. fuel use (liters/acre)** |
| --- | --- | --- | --- | --- | --- | --- | --- | --- | --- | --- | --- | --- |
| Pre-plant herbicide application | Sprayer 600-gal 70-ft 125-135 HP high clearance | Diesel |  |  |  |  | Roundup Power Max | 28 | 5.6 | 18.2 | 50.9 | 0.071 |
| Seeding B. carinata | Tractor - 4WD 475 HP | Diesel | 55-ft air drill with packer wheels | 5.406 | 55 | 11 |  |  |  | 71 | 20 | 3.550 |
| Spray for aphids | Sprayer 600-gal 70-ft 125-135 HP high clearance | Avgas |  |  |  |  | Warrior II | 1.92 | 0.768 | 75.7 | 352 | 0.086 |
| Post-harvest spray | Sprayer 600-gal 70-ft 125-135 HP high clearance | Diesel |  |  |  |  | Roundup Power Max | 64 | 12.8 | 18.2 | 50.9 | 0.071 |
| Pre-plant herbicide application | Sprayer 600-gal 70-ft 125-135 HP high clearance | Diesel |  |  |  |  | Roundup Power Max | 32 | 6.4 | 18.2 | 50.9 | 0.071 |
| Landmaster | 54 | 10.8 |
| Spray for grassy weeds | Sprayer 600-gal 70-ft 125-135 HP high clearance | Diesel |  |  |  |  | Assure II | 12 | 2.4 | 18.2 | 50.9 | 0.071 |
| Post-harvest spray | Sprayer 600-gal 70-ft 125-135 HP high clearance | Diesel |  |  |  |  | Paraquat Concentrate | 51 | 10.2 | 18.2 | 50.9 | 0.071 |
| Spray for weeds | Sprayer 600-gal 70-ft 125-135 HP high clearance | Diesel |  |  |  |  | Glyster plus | 48 | 9.6 | 18.2 | 50.9 | 0.071 |
| Post-harvest spray | Sprayer 600-gal 70-ft 125-135 HP high clearance | Diesel |  |  |  |  | Paraquat Concentrate | 60 | 12 | 18.2 | 50.9 | 0.071 |
| Flail mow | Tractor - 4WD 475 HP | Diesel | Rears 30-ft flail chopper |  |  |  |  |  |  | 71 | 12.78 | 1.111 |
| Spray for weeds | Sprayer 600-gal 70-ft 125-135 HP high clearance | Diesel |  |  |  |  | Roundup RT3 | 48 | 9.6 | 18.2 | 50.9 | 0.071 |
|  |  |  |  | Gunsmoke | 3.2 | 0.64 |
| Spray for weeds | Sprayer 600-gal 70-ft 125-135 HP high clearance | Diesel |  |  |  |  | Roundup RT3 | 32 | 6.4 | 18.2 | 50.9 | 0.071 |
|  |  |  | Choice | 6.4 | 1.28 |
|  |  |  | Liberate | 6.4 | 1.28 |
|  |  |  | Unfoamer | 0.8 | 0.16 |
| Spray for insects | Bell 47 helicopter, Lycoming VO435 | Avgas |  |  |  |  | Silencer | 3.5 | 1.4 | 75.7 | 352 | 0.086 |
| Tactic | 1.6 | 0.64 |
| Spray for insects | Bell 47 helicopter, Lycoming VO435 | Avgas |  |  |  |  | Lambda-CY | 3.84 | 1.536 | 75.7 | 352 | 0.086 |
|  |  |  |  | Wetcit | 5 | 2 |
| Harvest | Combine 350 hp | Diesel |  |  |  |  |  |  |  | 56 | 10.67 | 5.248 |
| Post-harvest spray | Sprayer 600-gal 70-ft 125-135 HP high clearance | Diesel |  |  |  |  | Gramoxone | 64 | 12.8 | 18.2 | 50.9 | 0.072 |
| Gunsmoke | 9.6 | 1.92 |
| Liberate | 9.6 | 1.92 |
| Unfoamer | 1.5 | 0.3 |
| Post-harvest spray | Bell 47 helicopter, Lycoming VO435 | Avgas |  |  |  |  | Cyclone (generic Paraquate) | 64 | 25.6 | 18.2 | 50.9 | 0.143 |

| **SW Field Practice** | **Equipment** | **Fuel** | **Implement** | **Seed Rate (lb/ac)** | **N (lb/ac)** | **S (lb/ac)** | **Pesticide** | **oz/ac** | **Avg**  **oz/ac** | **Fuel Usage (liters/hour)** | **Field Rate (acres/hour)** | **Avg. fuel use (liters/acre)** |
| --- | --- | --- | --- | --- | --- | --- | --- | --- | --- | --- | --- | --- |
| Pre-plant herbicide application | Sprayer 600-gal 70-ft 125-135 HP high clearance | Diesel |  |  |  |  | Roundup Power Max | 28 | 5.6 | 18.2 | 50.9 | 0.071 |
| Seeding spring wheat | Tractor - 4WD 475 HP | Diesel | 55-ft air drill with packer | 117.6 | 55 | 11 |  |  |  | 71 | 20 | 3.550 |
| Post-harvest spray | Sprayer 600-gal 70-ft 125-135 HP high clearance | Diesel |  |  |  |  | Roundup Power Max | 64 | 12.8 | 18.2 | 50.9 | 0.071 |
| Pre-plant herbicide application | Sprayer 600-gal 70-ft 125-135 HP high clearance | Diesel |  |  |  |  | Roundup Power Max | 64 | 12.8 | 18.2 | 50.9 | 0.071 |
| Spray for weeds | Sprayer 600-gal 70-ft 125-135 HP high clearance | Diesel |  |  |  |  | Brox-M | 16 | 3.2 | 18.2 | 50.9 | 0.071 |
| Affinity Broadspec | 0.6 | 0.12 |
| Post-harvest spray | Sprayer 600-gal 70-ft 125-135 HP high clearance | Diesel |  |  |  |  | Paraquat Concentrate | 51 | 10.2 | 18.2 | 50.9 | 0.071 |
| Spray for weeds | Sprayer 600-gal 70-ft 125-135 HP high clearance | Diesel |  |  |  |  | Vendetta | 25 | 5 | 18.2 | 50.9 | 0.071 |
|  |  |  | Harmony Extra | 0.5 | 0.1 |
| Post-harvest spray | Sprayer 600-gal 70-ft 125-135 HP high clearance | Diesel |  |  |  |  | Paraquat Concentrate | 60 | 12 | 18.2 | 50.9 | 0.071 |
| Flail mow | Tractor - 4WD 475 HP | Diesel | Rears 30-ft flail chopper |  |  |  |  |  |  | 71 | 12.78 | 1.111 |
| Spray for weeds | Sprayer 600-gal 70-ft 125-135 HP high clearance | Diesel |  |  |  |  | Roundup RT3 | 48 | 9.6 | 18.2 | 50.9 | 0.071 |
|  |  |  |  | Gunsmoke | 3.2 | 0.64 |
| Spray for weeds | Sprayer 600-gal 70-ft 125-135 HP high clearance | Diesel |  |  |  |  | Roundup RT3 | 32 | 6.4 | 18.2 | 50.9 | 0.071 |
| Choice | 6.4 | 1.28 |
| Liberate | 6.4 | 1.28 |
|  |  |  | Unfoamer | 0.8 | 0.16 |  |
| Spray for weeds | Sprayer 600-gal 70-ft 125-135 HP high clearance | Diesel |  |  |  |  | Huskie | 15 | 3 | 18.2 | 50.9 | 0.071 |
| Liberate | 6.4 | 1.28 |  |
| Unfoamer | 1 | 0.2 |  |
| Spray for insects | Bell 47 helicopter, Lycoming VO435 | Avgas |  |  |  |  | Silencer | 3.5 | 1.4 | 75.7 | 352 | 0.086 |
|  |  |  | Tactic | 1.6 | 0.64 |  |
| Harvest | Combine 350 hp | Diesel |  |  |  |  |  |  |  | 56 | 10.67 | 5.248 |
| Post-harvest spray | Sprayer 600-gal 70-ft 125-135 HP high clearance | Diesel |  |  |  |  | Gramoxone | 64 | 12.8 | 18.2 | 50.9 | 0.071 |
|  |  | Gunsmoke | 9.6 | 1.92 |
| Liberate | 9.6 | 1.92 |
| Unfoamer | 1.5 | 0.3 |
| Post-harvest spray | Bell 47 helicopter, Lycoming VO435 | Avgas |  |  |  |  | Cyclone (generic Paraquate) | 64 | 25.6 | 18.2 | 50.9 | 0.143 |

Table S16: Average input field activities for rotation RTF-WO-ST on the basis of per acre per year

| **RTF Field Practices** | **Powered Equipment** | **Fuel** | **Implement** | **Seed Rate (lb/ac)** | **Fertilizer** | **N (lb/ac)** | **S (lb/ac)** | **Pesticide** | **oz/ac** | **Avg**  **oz/ac** | **Fuel Usage (liters/hour)** | **Field Rate (acres/hour)** | **Avg. fuel use (liters/acre)** |
| --- | --- | --- | --- | --- | --- | --- | --- | --- | --- | --- | --- | --- | --- |
| Conservation tillage | Tractor - 4WD 475 HP | Diesel | 30-ft wide blade sweep |  |  |  |  |  |  |  | 71 | 12.78 | 5.556 |
| Flail mow | Tractor - 4WD 475 HP | Diesel | Rears 30-ft flail chopper |  |  |  |  |  |  |  | 71 | 12.78 | 1.111 |
| Post-harvest spray | Sprayer 600-gal 70-ft 125-135 HP high clearance | Diesel |  |  |  |  |  | Roundup Power Max | 64 | 12.8 | 18.2 | 50.9 | 0.071 |
| Post-harvest spray | Sprayer 600-gal 70-ft 125-135 HP high clearance | Diesel |  |  |  |  |  | Paraquat Concentrate | 51 | 10.2 | 18.2 | 50.9 | 0.071 |
| Post-harvest spray | Sprayer 600-gal 70-ft 125-135 HP high clearance | Diesel |  |  |  |  |  | Paraquat Concentrate | 60 | 12 | 18.2 | 50.9 | 0.071 |
| Post-harvest spray | Bell 47 helicopter, Lycoming VO435 | Avgas |  |  |  |  |  | Cyclone (generic Paraquate) | 64 | 25.6 | 18.2 | 50.9 | 0.143 |
| Pre-plant herbicide application | Sprayer 600-gal 70-ft 125-135 HP high clearance | Diesel |  |  |  |  |  | Roundup Power Max | 64 | 12.8 | 18.2 | 50.9 | 0.071 |
| Spray for insects | Bell 47 helicopter, Lycoming VO435 | Avgas |  |  |  |  |  | Silencer | 3.5 | 1.4 | 75.7 | 352 | 0.086 |
| Tactic | 1.6 | 0.64 |
| Spray for weeds | Sprayer 600-gal 70-ft 125-135 HP high clearance | Diesel |  |  |  |  |  | Roundup Power Max | 64 | 25.6 | 18.2 | 50.9 | 0.143 |
| Spray for weeds | Sprayer 600-gal 70-ft 125-135 HP high clearance | Diesel |  |  |  |  |  | Roundup Power Max | 32 | 12.8 | 18.2 | 50.9 | 0.143 |
| Spray for weeds | Sprayer 600-gal 70-ft 125-135 HP high clearance | Diesel |  |  |  |  |  | Gly Star Plus | 48 | 9.6 | 18.2 | 50.9 | 0.071 |
| Spray for weeds | Sprayer 600-gal 70-ft 125-135 HP high clearance | Diesel |  |  |  |  |  | Roundup RT3 | 64 | 25.6 | 18.2 | 50.9 | 0.143 |
| Spray for weeds | Sprayer 600-gal 70-ft 125-135 HP high clearance | Diesel |  |  |  |  |  | Roundup RT3 | 48 | 9.6 | 18.2 | 50.9 | 0.071 |
|  |  |  |  |  | Gunsmoke | 3.2 | 0.64 |
| Spray for weeds | Sprayer 600-gal 70-ft 125-135 HP high clearance | Diesel |  |  |  |  |  | Roundup RT3 | 64 | 12.8 | 18.2 | 50.9 | 0.071 |
|  |  |  |  |  | Affinity BroadSpec | 0.5 | 0.1 |
|  |  |  |  |  | Liberate | 6.4 | 1.28 |
| Spray for weeds | Sprayer 600-gal 70-ft 125-135 HP high clearance | Diesel |  |  |  |  |  | Roundup RT3 | 32 | 6.4 | 18.2 | 50.9 | 0.071 |
|  |  |  |  |  | Choice | 6.4 | 1.28 |
|  |  |  |  |  | Liberate | 6.4 | 1.28 |
|  |  |  |  |  | Unfoamer | 0.8 | 0.16 |
| Spray for weeds | Sprayer 600-gal 70-ft 125-135 HP high clearance | Diesel |  |  |  |  |  | Roundup RT3 | 44 | 8.8 | 18.2 | 50.9 | 0.071 |
|  |  |  |  |  | Rifle | 12 | 2.4 |
|  |  |  |  |  | Gunsmoke | 6.4 | 1.28 |
|  |  |  |  |  | Liberate | 6.4 | 1.28 |
|  |  |  |  |  | Unfoamer | 1 | 0.2 |

| **WO Field Practices** | **Powered Equipment** | **Fuel** | **Implement** | **Seed Rate (lb/ac)** | **Fertilizer** | **N (lb/ac)** | **S (lb/ac)** | **Pesticide** | **oz/ac** | **Avg**  **oz/ac** | **Fuel Usage (liters/hour)** | **Field Rate (acres/hour)** | **Avg. fuel use (liters/acre)** |
| --- | --- | --- | --- | --- | --- | --- | --- | --- | --- | --- | --- | --- | --- |
| Flail mow | Tractor - 4WD 475 HP | Diesel | Rears 30-ft flail chopper |  |  |  |  |  |  |  | 71 | 12.78 | 1.111 |
| Harvest | Combine 350 hp | Diesel |  |  |  |  |  |  |  |  | 56 | 10.67 | 5.248 |
| Post-harvest spray | Sprayer 600-gal 70-ft 125-135 HP high clearance | Diesel |  |  |  |  |  | Paraquat Concentrate | 60 | 12 | 18.2 | 50.9 | 0.071 |
| Post-harvest spray | Bell 47 helicopter, Lycoming VO435 | Avgas |  |  |  |  |  | Cyclone (generic Paraquate) | 64 | 25.6 | 18.2 | 50.9 | 0.143 |
| Post-harvest spray | Sprayer 600-gal 70-ft 125-135 HP high clearance | Diesel |  |  |  |  |  | Gramoxone | 64 | 12.8 | 18.2 | 50.9 | 0.071 |
| Gunsmoke | 9.6 | 1.92 |
| Liberate | 9.6 | 1.92 |
| Unfoamer | 1.5 | 0.3 |
| Seeding winter canola | Tractor - 4WD 475 HP | Diesel | 55-ft air drill with packer wheels | 5.464 | 79% UAN - 21% ThioSul applied at 196 lb/ac | 55 | 11 |  |  |  | 71 | 20 | 3.550 |
| Spray for insects | Bell 47 helicopter, Lycoming VO435 | Avgas |  |  |  |  |  | Silencer | 3.5 | 1.4 | 75.7 | 352 | 0.086 |
|  | Tactic | 1.6 | 0.64 |
| Spray for insects | Bell 47 helicopter, Lycoming VO435 | Avgas |  |  |  |  |  | Lambda-CY | 3.84 | 1.54 | 75.7 | 352 | 0.086 |
| Wetcit | 5 | 2 |
| Spray for weeds | Sprayer 600-gal 70-ft 125-135 HP high clearance | Diesel |  |  |  |  |  | Gly Star Plus | 48 | 9.6 | 18.2 | 50.9 | 0.071 |
| Spray for weeds | Sprayer 600-gal 70-ft 125-135 HP high clearance | Diesel |  |  |  |  |  | Roundup RT3 | 48 | 9.6 | 18.2 | 50.9 | 0.071 |
| Gunsmoke | 3.2 | 0.64 |

| **ST Field Practices** | **Powered Equipment** | **Fuel** | **Implement** | **Seed Rate (lb/ac)** | **Fertilizer** | **N (lb/ac)** | **S (lb/ac)** | **Pesticide** | **oz/ac** | **Avg**  **oz/ac** | **Fuel Usage (liters/hour)** | **Field Rate (acres/hour)** | **Avg. fuel use (liters/acre)** |
| --- | --- | --- | --- | --- | --- | --- | --- | --- | --- | --- | --- | --- | --- |
| Flail mow | Tractor - 4WD 475 HP | Diesel | Rears 30-ft flail chopper |  |  |  |  |  |  |  | 71 | 12.78 | 1.111 |
| Harvest | Combine 350 hp |  |  |  |  |  |  |  |  |  | 56 | 10.67 | 5.248 |
| Post-harvest spray | Sprayer 600-gal 70-ft 125-135 HP high clearance | Diesel |  |  |  |  |  | Roundup Power Max | 64 | 12.8 | 18.2 | 50.9 | 0.072 |
| Post-harvest spray | Sprayer 600-gal 70-ft 125-135 HP high clearance | Diesel |  |  |  |  |  | Paraquat Concentrate | 51 | 10.2 | 18.2 | 50.9 | 0.072 |
| Post-harvest spray | Sprayer 600-gal 70-ft 125-135 HP high clearance | Diesel |  |  |  |  |  | Paraquat Concentrate | 60 | 12 | 18.2 | 50.9 | 0.072 |
| Post-harvest spray | Bell 47 helicopter, Lycoming VO435 | Avgas |  |  |  |  |  | Cyclone (generic Paraquate) | 64 | 25.6 | 18.2 | 50.9 | 0.143 |
| Pre-plant herbicide application | Sprayer 600-gal 70-ft 125-135 HP high clearance | Diesel | N/A |  |  |  |  | Roundup Power Max | 28 | 5.6 | 18.2 | 50.9 | 0.071 |
| Pre-plant herbicide application | Sprayer 600-gal 70-ft 125-135 HP high clearance | Diesel |  |  |  |  |  | Roundup Power Max | 64 | 12.8 | 18.2 | 50.9 | 0.071 |
| Seeding spring triticale | Tractor - 4WD 475 HP | Diesel | 55-ft air drill with packer wheels | 100.6 | 79% UAN - 21% ThioSul applied at 196 lb/ac | 55 | 11 |  |  |  | 71 | 20 | 3.550 |
| Spray for insects | Bell 47 helicopter, Lycoming VO435 | Avgas |  |  |  |  |  | Silencer | 3.5 | 1.4 | 75.7 | 352 | 0.086 |
|  |  |  |  |  | Tactic | 1.6 | 0.64 |  |  |  |
| Spray for weeds | Sprayer 600-gal 70-ft 125-135 HP high clearance | Diesel |  |  |  |  |  | Brox-M | 16 | 3.2 | 18.2 | 50.9 | 0.071 |
|  |  |  |  | Affinity Broadspec | 0.6 | 0.12 |
| Spray for weeds | Sprayer 600-gal 70-ft 125-135 HP high clearance | Diesel |  |  |  |  |  | Vendetta | 25 | 5 | 18.2 | 50.9 | 0.071 |
|  |  |  |  | Harmony Extra | 0.5 | 0.1 |
| Spray for weeds | Sprayer 600-gal 70-ft 125-135 HP high clearance | Diesel |  |  |  |  |  | Roundup RT3 | 48 | 9.6 | 18.2 | 50.9 | 0.071 |
| Gunsmoke | 3.2 | 0.64 |
| Spray for weeds | Sprayer 600-gal 70-ft 125-135 HP high clearance | Diesel |  |  |  |  |  | Roundup RT3 | 32 | 6.4 | 18.2 | 50.9 | 0.071 |
| Choice | 6.4 | 1.28 |
| Liberate | 6.4 | 1.28 |
| Unfoamer | 0.8 | 0.16 |
| Spray for weeds | Sprayer 600-gal 70-ft 125-135 HP high clearance | Diesel |  |  |  |  |  | Huskie | 15 | 3 | 18.2 | 50.9 | 0.071 |
|  |  |  |  |  | Liberate | 6.4 | 1.28 |
|  |  |  |  |  | Unfoamer | 1 | 0.2 |
| Post-harvest spray | Sprayer 600-gal 70-ft 125-135 HP high clearance | Diesel |  |  |  |  |  | Gramoxone | 64 | 12.8 | 18.2 | 50.9 | 0.071 |
| Gunsmoke | 9.6 | 1.92 |
| Liberate | 9.6 | 1.92 |
|  |  |  |  |  | Unfoamer | 1.5 | 0.3 |

Table S17: Average input field activities for rotation RTF-SO-WT on the basis of per acre per year

| **Practice**  **RTF** | **Fuel** | **Pesticide** | **oz/ac** | **Avg**  **oz/ac** | **Fuel Usage (liters/hour)** | **Field Rate (acres/hour)** | **Avg. fuel use (liters/acre)** |
| --- | --- | --- | --- | --- | --- | --- | --- |
| Spray for weeds | Diesel | Roundup Power Max | 64 | 12.8 | 18.2 | 50.9 | 0.071 |
| Conservation tillage | Diesel |  |  | 0 | 71 | 12.78 | 5.556 |
| Post-harvest spray | Diesel | Roundup Power Max | 64 | 12.8 | 18.2 | 50.9 | 0.071 |
| Pre-plant herbicide application | Diesel | Roundup Power Max | 64 | 12.8 | 18.2 | 50.9 | 0.071 |
| Spray for weeds | Diesel | Roundup Power Max | 32 | 6.4 | 18.2 | 50.9 | 0.071 |
| Post-harvest spray | Diesel | Paraquat Concentrate | 51 | 10.2 | 18.2 | 50.9 | 0.071 |
| Spray for weeds | Diesel | Gly Star Plus | 48 | 9.6 | 18.2 | 50.9 | 0.071 |
| Spray for weeds | Diesel | Roundup RT3 | 64 | 25.6 | 18.2 | 50.9 | 0.143 |
| Post-harvest spray | Diesel | Paraquat Concentrate | 60 | 12 | 18.2 | 50.9 | 0.071 |
| Flail mow | Diesel |  |  | 0 | 71 | 12.78 | 1.111 |
| Spray for weeds | Diesel | Roundup RT3 | 48 | 9.6 | 18.2 | 50.9 | 0.071 |
| Gunsmoke | 3.2 | 0.64 |
| Spray for weeds | Diesel | Roundup RT3 | 64 | 12.8 | 18.2 | 50.9 | 0.071 |
| Affinity BroadSpec | 0.5 | 0.1 |
| Liberate | 6.4 | 1.28 |
| Spray for insects | Avgas | Silencer | 3.5 | 1.4 | 75.7 | 352 | 0.086 |
| Tactic | 1.6 | 0.64 |
| Post-harvest spray | Avgas | Cyclone (generic Paraquate) | 64 | 25.6 | 18.2 | 50.9 | 0.143 |
| Spray for weeds | Diesel | Roundup RT3 | 32 | 6.4 | 18.2 | 50.9 | 0.071 |
| Choice | 6.4 | 1.28 |
| Liberate | 6.4 | 1.28 |
| Unfoamer | 0.8 | 0.16 |
| Spray for weeds | Diesel | Roundup RT3 | 44 | 8.8 | 18.2 | 50.9 | 0.071 |
| Rifle | 12 | 2.4 |
| Gunsmoke | 6.4 | 1.28 |
| Liberate | 6.4 | 1.28 |
| Unfoamer | 1 | 0.2 |

| **WT Field Practice** | **Fuel** | **Seed Rate (lb/ac)** | **N (lb/ac)** | **S (lb/ac)** | **Pesticide** | **oz/ac** | **Avg**  **oz/ac** | **Fuel Usage (liters/hour)** | **Field Rate (acres/hour)** | **Avg. fuel use (liters/acre)** |
| --- | --- | --- | --- | --- | --- | --- | --- | --- | --- | --- |
| Post-harvest spray | Diesel |  |  |  | Roundup Power Max | 64 | 12.8 | 18.2 | 50.9 | 0.071 |
| Pre-plant herbicide application | Diesel |  |  |  | Roundup Power Max | 64 | 12.8 | 18.2 | 50.9 | 0.071 |
| seeding winter triticale | Diesel | 115.5 | 55 | 11 |  |  |  | 71 | 20 | 3.550 |
| Post-harvest spray | Diesel |  |  |  | Paraquat Concentrate | 51 | 10.2 | 18.2 | 50.9 | 0.071 |
| Spray for weeds | Diesel |  |  |  | Vendetta | 32 | 6.4 | 18.2 | 50.9 | 0.071 |
| Harmony Extra | 0.5 | 0.1 |
| Post-harvest spray | Diesel |  |  |  | Paraquat Concentrate | 60 | 12 | 18.2 | 50.9 | 0.071 |
| Flail mow | Diesel |  |  |  |  |  |  | 71 | 12.78 | 1.111 |
| Spray for weeds | Diesel |  |  |  | Huskie | 14 | 2.8 | 18.2 | 50.9 | 0.071 |
| AffinityBroad Spec | 0.5 | 0.1 |
| Osprey | 4.75 | 0.95 |
| Fitness | 6 | 1.2 |
| Liberate | 3.2 | 0.64 |
| Spray for insects | Avgas |  |  |  | Silencer | 3.5 | 1.4 | 75.7 | 352 | 0.086 |
|  |  |  |  |  | Tactic | 1.6 | 0.64 |  |  |
| Harvest | Diesel |  |  |  |  |  |  | 56 | 10.67 | 5.248 |
| Post-harvest spray | Avgas |  |  |  | Cyclone (generic Paraquate) | 64 | 25.6 | 18.2 | 50.9 | 0.072 |
| Spray for weeds | Diesel |  |  |  | Huskie | 14 | 2.8 | 18.2 | 50.9 | 0.072 |
| Liberate | 6.4 | 1.28 |
| Unfoamer | 1.2 | 0.24 |
| Solution 32 | 64 | 12.8 |
| Post-harvest spray | Diesel |  |  |  | Gramoxone | 64 | 12.8 | 18.2 | 50.9 | 0.072 |
| Gunsmoke | 9.6 | 1.92 |
|  | Liberate | 9.6 | 1.92 |
|  |  |  | Unfoamer | 1.5 | 0.3 |

| **SO Field Practice** | **Fuel** | **Seed Rate (lb/ac)** | **N (lb/ac)** | **S (lb/ac)** |  | **oz/ac** | **Avg**  **oz/ac** | **Fuel Usage (liters/hour)** | **Field Rate (acres/hour)** | **Avg. fuel use (liters/acre)** |
| --- | --- | --- | --- | --- | --- | --- | --- | --- | --- | --- |
| Pre-plant herbicide application | Diesel |  |  |  | Roundup Power Max | 28 | 5.6 | 18.2 | 50.9 | 0.071 |
| Seeding B. carinata | Diesel | 5.406 | 55 | 11 |  |  |  | 71 | 20 | 3.550 |
| Spray for aphids | Avgas |  |  |  | Warrior II | 1.92 | 0.768 | 75.7 | 352 | 0.086 |
| Post-harvest spray | Diesel |  |  |  | Roundup Power Max | 64 | 12.8 | 18.2 | 50.9 | 0.071 |
| Pre-plant herbicide application | Diesel |  |  |  | Roundup Power Max | 32 | 6.4 | 18.2 | 50.9 | 0.071 |
| Landmaster | 54 | 10.8 |
| Spray for grassy weeds | Diesel |  |  |  | Assure II | 12 | 2.4 | 18.2 | 50.9 | 0.071 |
| Post-harvest spray | Diesel |  |  |  | Paraquat Concentrate | 51 | 10.2 | 18.2 | 50.9 | 0.071 |
| Spray for weeds | Diesel |  |  |  | Gly Star Plus | 48 | 9.6 | 18.2 | 50.9 | 0.071 |
| Post-harvest spray | Diesel |  |  |  | Paraquat Concentrate | 60 | 12 | 18.2 | 50.9 | 0.071 |
| Flail mow | Diesel |  |  |  |  |  |  | 71 | 12.78 | 1.111 |
| Spray for weeds | Diesel |  |  |  | Roundup RT3 | 48 | 9.6 | 18.2 | 50.9 | 0.071 |
| Gunsmoke | 3.2 | 0.64 |
| Spray for insects | Avgas |  |  |  | Silencer | 3.5 | 1.4 | 75.7 | 352 | 0.086 |
| Tactic | 1.6 | 0.64 |
| Harvest | Diesel |  |  |  |  |  |  | 56 | 10.67 | 5.248 |
| Post-harvest spray | Avgas |  |  |  | Cyclone (generic Paraquate) | 64 | 25.6 | 18.2 | 50.9 | 0.143 |
| Spray for weeds | Diesel |  |  |  | Roundup RT3 | 32 | 6.4 | 18.2 | 50.9 | 0.071 |
| Choice | 6.4 | 1.28 |
| Liberate | 6.4 | 1.28 |
| Unfoamer | 0.8 | 0.16 |
| Spray for insects | Avgas |  |  |  | Lambda-CY | 3.84 | 1.536 | 75.7 | 352 | 0.086 |
| Wetcit | 5 | 2 |
| Post-harvest spray | Diesel |  |  |  | Gramoxone | 64 | 12.8 | 18.2 | 50.9 | 0.071 |
| Gunsmoke | 9.6 | 1.92 |
| Liberate | 9.6 | 1.92 |
| Unfoamer | 1.5 | 0.3 |

**Section 1C** gives detailed information of conversions of pesticides from fluid ounces to grams (schematic diagrams presented below describe the calculation)

Pesticides and rate from field activities table in section 1 in oz. /acre

Conversions tables for calculations in g/acre section 1a

MSDS for bulk density, % active ingredient

**Table of Content for Section 1C**

| **Table No** | **Content** | **Page no** |
| --- | --- | --- |
| S18 | SF-WW rotation Conversions of pesticides from fluid ounce to grams | 38 |
| S19 | RTF-WW rotation Conversions of pesticides from fluid ounce to grams | 38 |
| S20 | RTF-WO (RTF-WO-RTF-WW) rotation Conversions of pesticides from fluid ounce to grams | 39 |
| S21 | RTF-WW (RTF-WW-RTF-WO) rotation Conversions of pesticides from fluid ounce to grams | 40 |
| S22 | RTF-WW-SB rotation Conversions of pesticides from fluid ounce to grams | 41 |
| S23 | RTF-WW-SO rotation Conversions of pesticides from fluid ounce to grams | 43 |
| S24 | RTF-WO-SW rotation Conversions of pesticides from fluid ounce to grams | 44 |
| S25 | RTF-SW-SO rotation Conversions of pesticides from fluid ounce to grams | 46 |
| S26 | RTF-WO-ST rotation Conversions of pesticides from fluid ounce to grams | 48 |
| S27 | RTF-SO-WT rotation Conversions of pesticides from fluid ounce to grams | 50 |

Table S18: SF-WW rotation Conversions of pesticides from fluid ounce to grams

|  | **Bulk Density from MSDS** | **Units** | **Volume of herbicide applied** | **Units** | **Conversion Factor** | **Units** | **Volume** | **units** | **Mass Herbicide applied** | **Units** | **% Active gradient in Herbicide** | **Mass of active gradient** | **units** |
| --- | --- | --- | --- | --- | --- | --- | --- | --- | --- | --- | --- | --- | --- |
| Round Up powemax | 1.3565 | g/ml | 51.2 | oz. (volume)/ac | 29.57 | ml/oz. | 1513.98 | ml/ac | 2053.72 | grams/ac | 48.7 | 1000.161 | grams/ac |
| Round up RT3 | 1.3573 | g/ml | 16 | oz. (volume)/ac | 29.57 | ml/oz. | 473.12 | ml/ac | 642.17 | grams/ac | 48.8 | 313.3769 | grams/ac |
| Affinity Broadspec | 1.21 | g/ml | 0.1 | oz. (volume)/ac | 29.57 | ml/oz. | 2.96 | ml/ac | 3.58 | grams/ac | 50 | 1.788985 | grams/ac |
| Vendetta | 1.14 | g/ml | 6.4 | oz. (volume)/ac | 29.57 | ml/oz. | 189.25 | ml/ac | 215.74 | grams/ac | 100 | 215.7427 | grams/ac |
| Osprey | 0.92475 | g/ml | 1.9 | oz. (volume)/ac | 29.57 | ml/oz. | 56.18 | ml/ac | 51.96 | grams/ac | 4.5 | 2.337985 | grams/ac |
| Liberate | 0.98 | g/ml | 5.12 | oz. (volume)/ac | 29.57 | ml/oz. | 151.40 | ml/ac | 148.37 | grams/ac | 100 | 148.3704 | grams/ac |
| Gunsmoke | 1.195 | g/ml | 2.56 | oz. (volume)/ac | 29.57 | ml/oz. | 75.70 | ml/ac | 90.46 | grams/ac | 80 | 72.36844 | grams/ac |
| Harmony extra | 1.24 | g/ml | 0.1 | oz. (volume)/ac | 29.57 | ml/oz. | 2.96 | ml/ac | 3.67 | grams/ac | 50 | 1.83334 | grams/ac |
| Fitness | 1.04 | g/ml | 1.2 | oz. (volume)/ac | 29.57 | ml/oz. | 35.48 | ml/ac | 36.90 | grams/ac | 45 | 16.60651 | grams/ac |
| Huskie | 1.14 | g/ml | 5.6 | oz. (volume)/ac | 29.57 | ml/oz. | 165.59 | ml/ac | 188.77 | grams/ac | 35 | 66.07121 | grams/ac |
| Silencer | 0.93 | g/ml | 2.8 | oz. (volume)/ac | 29.57 | ml/oz. | 82.80 | ml/ac | 77.00 | grams/ac | 11.4 | 8.778032 | grams/ac |
| Tactic | 1.025 | g/ml | 1.28 | oz. (volume)/ac | 29.57 | ml/oz. | 37.85 | ml/ac | 38.80 | grams/ac | 63.4 | 24.59656 | grams/ac |
| Choice | 1.13 | g/ml | 1.28 | oz. (volume)/ac | 29.57 | ml/oz. | 37.85 | ml/ac | 42.77 | grams/ac | 50 | 21.38502 | grams/ac |
| Unfoamer | 1 | g/ml | 0.7 | oz. (volume)/ac | 29.57 | ml/oz. | 20.70 | ml/ac | 20.70 | grams/ac | 12.5 | 2.587375 | grams/ac |
| Paraquat dichloride | 1.15 | g/ml | 44.4 | oz. (volume)/ac | 29.57 | ml/oz. | 1312.91 | ml/ac | 1509.84 | grams/ac | 43.2 | 652.2527 | grams/ac |
| Cyclone | 1.1 | g/ml | 38.4 | oz. (volume)/ac | 29.57 | ml/oz. | 1135.49 | ml/ac | 1249.04 | grams/ac | 30.1 | 375.9601 | grams/ac |
| Gramoxone | 1.12 | g/ml | 12.8 | oz. (volume)/ac | 29.57 | ml/oz. | 378.50 | ml/ac | 423.92 | grams/ac | 25 | 105.9789 | grams/ac |

Table S19: RTF-WW rotation Conversions of pesticides from fluid ounce to grams

|  | **Bulk Density from MSDS** | **Units** | **Volume of herbicide applied** | **Units** | **Conversion Factor** | **units** | **Volume** | **units** | **Mass Herbicide applied** | **Units** | **% Active gradient in Herbicide** | **Mass of active gradient** | **Units** |
| --- | --- | --- | --- | --- | --- | --- | --- | --- | --- | --- | --- | --- | --- |
| Round Up powemax | 1.3565 | g/ml | 70.4 | oz. (volume)/ac | 29.57 | ml/oz. | 2081.73 | ml/ac | 2823.86 | grams/ac | 48.7 | 1375.222 | grams/ac |
| Round up RT3 | 1.3573 | g/ml | 63.2 | oz. (volume)/ac | 29.57 | ml/oz. | 1868.82 | ml/ac | 2536.55 | grams/ac | 48.8 | 1237.839 | grams/ac |
| Affinity Broadspec | 1.21 | g/ml | 1.1 | oz. (volume)/ac | 29.57 | ml/oz. | 32.53 | ml/ac | 39.36 | grams/ac | 50 | 19.67884 | grams/ac |
| Vendetta | 1.14 | g/ml | 6.4 | oz. (volume)/ac | 29.57 | ml/oz. | 189.25 | ml/ac | 215.74 | grams/ac | 100 | 215.7427 | grams/ac |
| Osprey | 0.92475 | g/ml | 1.9 | oz. (volume)/ac | 29.57 | ml/oz. | 56.18 | ml/ac | 51.96 | grams/ac | 4.5 | 2.337985 | grams/ac |
| Liberate | 0.98 | g/ml | 7.68 | oz. (volume)/ac | 29.57 | ml/oz. | 227.10 | ml/ac | 222.56 | grams/ac | 100 | 222.5556 | grams/ac |
| Gunsmoke | 1.195 | g/ml | 3.84 | oz. (volume)/ac | 29.57 | ml/oz. | 113.55 | ml/ac | 135.69 | grams/ac | 80 | 108.5527 | grams/ac |
| Harmony extra | 1.24 | g/ml | 0.1 | oz. (volume)/ac | 29.57 | ml/oz. | 2.96 | ml/ac | 3.67 | grams/ac | 50 | 1.83334 | grams/ac |
| Fitness | 1.04 | g/ml | 1.2 | oz. (volume)/ac | 29.57 | ml/oz. | 35.48 | ml/ac | 36.90 | grams/ac | 45 | 16.60651 | grams/ac |
| Huskie | 1.14 | g/ml | 5.6 | oz. (volume)/ac | 29.57 | ml/oz. | 165.59 | ml/ac | 188.77 | grams/ac | 35 | 66.07121 | grams/ac |
| Silencer | 0.93 | g/ml | 2.8 | oz. (volume)/ac | 29.57 | ml/oz. | 82.80 | ml/ac | 77.00 | grams/ac | 11.4 | 8.778032 | grams/ac |
| Tactic | 1.025 | g/ml | 1.28 | oz. (volume)/ac | 29.57 | ml/oz. | 37.85 | ml/ac | 38.80 | grams/ac | 63.4 | 24.59656 | grams/ac |
| Choice | 1.13 | g/ml | 1.28 | oz. (volume)/ac | 29.57 | ml/oz. | 37.85 | ml/ac | 42.77 | grams/ac | 50 | 21.38502 | grams/ac |
| Unfoamer | 1 | g/ml | 0.9 | oz. (volume)/ac | 29.57 | ml/oz. | 26.61 | ml/ac | 26.61 | grams/ac | 12.5 | 3.326625 | grams/ac |
| Paraquat dichloride | 1.15 | g/ml | 44.4 | oz. (volume)/ac | 29.57 | ml/oz. | 1312.91 | ml/ac | 1509.84 | grams/ac | 43.2 | 652.2527 | grams/ac |
| Cyclone | 1.1 | g/ml | 51.2 | oz. (volume)/ac | 29.57 | ml/oz. | 1513.98 | ml/ac | 1665.38 | grams/ac | 30.1 | 501.2801 | grams/ac |
| Gramoxone | 1.12 | g/ml | 12.8 | oz. (volume)/ac | 29.57 | ml/oz. | 378.50 | ml/ac | 423.92 | grams/ac | 25 | 105.9789 | grams/ac |
| Rifle | 1.2 | g/ml | 2.4 | oz. (volume)/ac | 29.57 | ml/oz. | 70.97 | ml/ac | 85.16 | grams/ac | 48.2 | 41.04789 | grams/ac |
| Glystar plus | 1.18 | g/ml | 9.6 | oz. (volume)/ac | 29.57 | ml/oz. | 283.87 | ml/ac | 334.97 | grams/ac | 41 | 137.3373 | grams/ac |

Table S20: RTF-WO (RTF-WO-RTF-WW) rotation Conversions of pesticides from fluid ounce to grams

|  | **Bulk Density from MSDS** | **units** | **Volume of herbicide applied** | **Units** | **Conversion Factor** | **Units** | **Volume** | **units** | **Mass Herbicide applied** | **units** | **% Active gradient in Herbicide** | **Mass of active gradient** | **units** |
| --- | --- | --- | --- | --- | --- | --- | --- | --- | --- | --- | --- | --- | --- |
| Round Up powemax | 1.3565 | g/ml | 44.8 | oz. (volume)/ac | 29.57 | ml/oz. | 1324.74 | ml/ac | 1797.00 | grams/ac | 48.7 | 875.1411 | grams/ac |
| Round up RT3 | 1.3573 | g/ml | 60 | oz. (volume)/ac | 29.57 | ml/oz. | 1774.20 | ml/ac | 2408.12 | grams/ac | 48.8 | 1175.163 | grams/ac |
| Affinity Broadspec | 1.21 | g/ml | 0.1 | oz. (volume)/ac | 29.57 | ml/oz. | 2.96 | ml/ac | 3.58 | grams/ac | 50 | 1.788985 | grams/ac |
| Liberate | 0.98 | g/ml | 5.76 | oz. (volume)/ac | 29.57 | ml/oz. | 170.32 | ml/ac | 166.92 | grams/ac | 100 | 166.9167 | grams/ac |
| Gunsmoke | 1.195 | g/ml | 4.48 | oz. (volume)/ac | 29.57 | ml/oz. | 132.47 | ml/ac | 158.31 | grams/ac | 80 | 126.6448 | grams/ac |
| Silencer | 0.93 | g/ml | 1.4 | oz. (volume)/ac | 29.57 | ml/oz. | 41.40 | ml/ac | 38.50 | grams/ac | 11.4 | 4.389016 | grams/ac |
| Tactic | 1.025 | g/ml | 0.64 | oz. (volume)/ac | 29.57 | ml/oz. | 18.92 | ml/ac | 19.40 | grams/ac | 63.4 | 12.29828 | grams/ac |
| Choice | 1.13 | g/ml | 1.28 | oz. (volume)/ac | 29.57 | ml/oz. | 37.85 | ml/ac | 42.77 | grams/ac | 50 | 21.38502 | grams/ac |
| Unfoamer | 1 | g/ml | 1.86 | oz. (volume)/ac | 29.57 | ml/oz. | 55.00 | ml/ac | 55.00 | grams/ac | 12.5 | 6.875025 | grams/ac |
| Paraquat dichloride | 1.15 | g/ml | 34.2 | oz. (volume)/ac | 29.57 | ml/oz. | 1011.29 | ml/ac | 1162.99 | grams/ac | 43.2 | 502.4109 | grams/ac |
| Cyclone | 1.1 | g/ml | 25.6 | oz. (volume)/ac | 29.57 | ml/oz. | 756.99 | ml/ac | 832.69 | grams/ac | 30.1 | 250.6401 | grams/ac |
| Gramoxone | 1.12 | g/ml | 12.8 | oz. (volume)/ac | 29.57 | ml/oz. | 378.50 | ml/ac | 423.92 | grams/ac | 25 | 105.9789 | grams/ac |
| Rifle | 1.2 | g/ml | 2.4 | oz. (volume)/ac | 29.57 | ml/oz. | 70.97 | ml/ac | 85.16 | grams/ac | 48.2 | 41.04789 | grams/ac |
| Wetcit | 1.02 | g/ml | 2 | oz. (volume)/ac | 29.57 | ml/oz. | 59.14 | ml/ac | 60.32 | grams/ac | 8.15 | 4.916308 | grams/ac |
| Glystar plus | 1.18 | g/ml | 19.2 | oz. (volume)/ac | 29.57 | ml/oz. | 567.74 | ml/ac | 669.94 | grams/ac | 41 | 274.6745 | grams/ac |
| Warrior II | 1.1 | g/ml | 1.536 | oz. (volume)/ac | 29.57 | ml/oz. | 45.42 | ml/ac | 49.96 | grams/ac | 22.8 | 11.39122 | grams/ac |

Table S21: RTF-WW (RTF-WW-RTF-WO) rotation Conversions of pesticides from fluid ounce to grams

| **WW** | **Bulk Density from MSDS** | **units** | **Volume of herbicide applied** | **Units** | **Conversion Factor** | **Units** | **Volume** | **units** | **Mass Herbicide applied** | **units** | **% Active gradient in Herbicide** | **Mass of active gradient** | **units** |
| --- | --- | --- | --- | --- | --- | --- | --- | --- | --- | --- | --- | --- | --- |
| Round Up powemax | 1.3565 | g/ml | 70.4 | oz. (volume)/ac | 29.57 | ml/oz. | 2081.73 | ml/ac | 2823.86 | grams/ac | 48.7 | 1375.222 | grams/ac |
| Round up RT3 | 1.3573 | g/ml | 63.2 | oz. (volume)/ac | 29.57 | ml/oz. | 1868.82 | ml/ac | 2536.55 | grams/ac | 48.8 | 1237.839 | grams/ac |
| Affinity Broadspec | 1.21 | g/ml | 0.2 | oz. (volume)/ac | 29.57 | ml/oz. | 5.91 | ml/ac | 7.16 | grams/ac | 50 | 3.57797 | grams/ac |
| Vendetta | 1.14 | g/ml | 6.4 | oz. (volume)/ac | 29.57 | ml/oz. | 189.25 | ml/ac | 215.74 | grams/ac | 100 | 215.7427 | grams/ac |
| Osprey | 0.92475 | g/ml | 1.9 | oz. (volume)/ac | 29.57 | ml/oz. | 56.18 | ml/ac | 51.96 | grams/ac | 4.5 | 2.337985 | grams/ac |
| Liberate | 0.98 | g/ml | 7.68 | oz. (volume)/ac | 29.57 | ml/oz. | 227.10 | ml/ac | 222.56 | grams/ac | 100 | 222.5556 | grams/ac |
| Gunsmoke | 1.195 | g/ml | 3.84 | oz. (volume)/ac | 29.57 | ml/oz. | 113.55 | ml/ac | 135.69 | grams/ac | 80 | 108.5527 | grams/ac |
| Harmony extra | 1.24 | g/ml | 0.1 | oz. (volume)/ac | 29.57 | ml/oz. | 2.96 | ml/ac | 3.67 | grams/ac | 50 | 1.83334 | grams/ac |
| Fitness | 1.04 | g/ml | 1.2 | oz. (volume)/ac | 29.57 | ml/oz. | 35.48 | ml/ac | 36.90 | grams/ac | 45 | 16.60651 | grams/ac |
| Huskie | 1.14 | g/ml | 5.6 | oz. (volume)/ac | 29.57 | ml/oz. | 165.59 | ml/ac | 188.77 | grams/ac | 35 | 66.07121 | grams/ac |
| Silencer | 0.93 | g/ml | 2.8 | oz. (volume)/ac | 29.57 | ml/oz. | 82.80 | ml/ac | 77.00 | grams/ac | 11.4 | 8.778032 | grams/ac |
| Tactic | 1.025 | g/ml | 1.28 | oz. (volume)/ac | 29.57 | ml/oz. | 37.85 | ml/ac | 38.80 | grams/ac | 63.4 | 24.59656 | grams/ac |
| Choice | 1.13 | g/ml | 1.28 | oz. (volume)/ac | 29.57 | ml/oz. | 37.85 | ml/ac | 42.77 | grams/ac | 50 | 21.38502 | grams/ac |
| Unfoamer | 1 | g/ml | 0.9 | oz. (volume)/ac | 29.57 | ml/oz. | 26.61 | ml/ac | 26.61 | grams/ac | 12.5 | 3.326625 | grams/ac |
| Paraquat dichloride | 1.15 | g/ml | 44.4 | oz. (volume)/ac | 29.57 | ml/oz. | 1312.91 | ml/ac | 1509.84 | grams/ac | 43.2 | 652.2527 | grams/ac |
| Cyclone | 1.1 | g/ml | 51.2 | oz. (volume)/ac | 29.57 | ml/oz. | 1513.98 | ml/ac | 1665.38 | grams/ac | 30.1 | 501.2801 | grams/ac |
| Gramoxone | 1.12 | g/ml | 12.8 | oz. (volume)/ac | 29.57 | ml/oz. | 378.50 | ml/ac | 423.92 | grams/ac | 25 | 105.9789 | grams/ac |
| Glystar plus | 1.18 | g/ml | 9.6 | oz. (volume)/ac | 29.57 | ml/oz. | 283.87 | ml/ac | 334.97 | grams/ac | 41 | 137.3373 | grams/ac |
| Rifle | 1.2 | g/ml | 2.4 | oz. (volume)/ac | 29.57 | ml/oz. | 70.97 | ml/ac | 85.16 | grams/ac | 48.2 | 41.04789 | grams/ac |

Table S22: RTF-WW-SB rotation Conversions of pesticides from fluid ounce to grams

|  | **Bulk Density from MSDS** | **units** | **Volume of herbicide applied** | **Units** | **Conversion Factor** | **Units** | **Volume** | **units** | **Mass Herbicide applied** | **units** | **% Active gradient in Herbicide** | **Mass of active gradient** | **units** |
| --- | --- | --- | --- | --- | --- | --- | --- | --- | --- | --- | --- | --- | --- |
| **RTF** |  |  |  |  |  |  |  |  |  |  |  |  |  |
| Round Up powemax | 1.3565 | g/ml | 44.8 | oz. (volume)/ac | 29.57 | ml/oz. | 1324.74 | ml/ac | 1797.00 | grams/ac | 48.7 | 875.1411 | grams/ac |
| Round up RT3 | 1.3573 | g/ml | 63.2 | oz. (volume)/ac | 29.57 | ml/oz. | 1868.82 | ml/ac | 2536.55 | grams/ac | 48.8 | 1237.839 | grams/ac |
| Gunsmoke | 1.195 | g/ml | 1.92 | oz. (volume)/ac | 29.57 | ml/oz. | 56.77 | ml/ac | 67.85 | grams/ac | 80 | 54.27633 | grams/ac |
| Affinity Broadspec | 1.21 | g/ml | 0.1 | oz. (volume)/ac | 29.57 | ml/oz. | 2.96 | ml/ac | 3.58 | grams/ac | 50 | 1.788985 | grams/ac |
| Tactic | 1.025 | g/ml | 0.64 | oz. (volume)/ac | 29.57 | ml/oz. | 18.92 | ml/ac | 19.40 | grams/ac | 63.4 | 12.29828 | grams/ac |
| Liberate | 0.98 | g/ml | 3.84 | oz. (volume)/ac | 29.57 | ml/oz. | 113.55 | ml/ac | 111.28 | grams/ac | 100 | 111.2778 | grams/ac |
| Silencer | 0.93 | g/ml | 1.4 | oz. (volume)/ac | 29.57 | ml/oz. | 41.40 | ml/ac | 38.50 | grams/ac | 11.4 | 4.389016 | grams/ac |
| Paraquat dichloride | 1.15 | g/ml | 22.2 | oz. (volume)/ac | 29.57 | ml/oz. | 656.45 | ml/ac | 754.92 | grams/ac | 43.2 | 326.1263 | grams/ac |
| Cyclone | 1.1 | g/ml | 25.6 | oz. (volume)/ac | 29.57 | ml/oz. | 756.99 | ml/ac | 832.69 | grams/ac | 30.1 | 250.6401 | grams/ac |
| Glystar plus | 1.18 | g/ml | 9.6 | oz. (volume)/ac | 29.57 | ml/oz. | 283.87 | ml/ac | 334.97 | grams/ac | 41 | 137.3373 | grams/ac |
| Choice | 1.13 | g/ml | 1.28 | oz. (volume)/ac | 29.57 | ml/oz. | 37.85 | ml/ac | 42.77 | grams/ac | 50 | 21.38502 | grams/ac |
| Unfoamer | 1 | g/ml | 0.36 | oz. (volume)/ac | 29.57 | ml/oz. | 10.65 | ml/ac | 10.65 | grams/ac | 12.5 | 1.33065 | grams/ac |
| Rifle | 1.2 | g/ml | 2.4 | oz. (volume)/ac | 29.57 | ml/oz. | 70.97 | ml/ac | 85.16 | grams/ac | 48.2 | 41.04789 | grams/ac |
| **SB** |  |  |  |  |  |  |  |  |  |  |  |  |  |
| Round Up powemax | 1.3565 | g/ml | 31.2 | oz. (volume)/ac | 29.57 | ml/oz. | 922.58 | ml/ac | 1251.49 | grams/ac | 48.7 | 609.4733 | grams/ac |
| Round up RT3 | 1.3573 | g/ml | 16 | oz. (volume)/ac | 29.57 | ml/oz. | 473.12 | ml/ac | 642.17 | grams/ac | 48.8 | 313.3769 | grams/ac |
| Vendetta | 1.14 | g/ml | 5 | oz. (volume)/ac | 29.57 | ml/oz. | 147.85 | ml/ac | 168.55 | grams/ac | 100 | 168.549 | grams/ac |
| Harmony extra | 1.24 | g/ml | 0.1 | oz. (volume)/ac | 29.57 | ml/oz. | 2.96 | ml/ac | 3.67 | grams/ac | 50 | 1.83334 | grams/ac |
| Affinity Broadspec | 1.21 | g/ml | 0.12 | oz. (volume)/ac | 29.57 | ml/oz. | 3.55 | ml/ac | 4.29 | grams/ac | 50 | 2.146782 | grams/ac |
| Paraquat dichloride | 1.15 | g/ml | 22.2 | oz. (volume)/ac | 29.57 | ml/oz. | 656.45 | ml/ac | 754.92 | grams/ac | 43.2 | 326.1263 | grams/ac |
| Cyclone | 1.1 | g/ml | 25.6 | oz. (volume)/ac | 29.57 | ml/oz. | 756.99 | ml/ac | 832.69 | grams/ac | 30.1 | 250.6401 | grams/ac |
| Gramoxone | 1.12 | g/ml | 12.8 | oz. (volume)/ac | 29.57 | ml/oz. | 378.50 | ml/ac | 423.92 | grams/ac | 25 | 105.9789 | grams/ac |
| Silencer | 0.93 | g/ml | 1.4 | oz. (volume)/ac | 29.57 | ml/oz. | 41.40 | ml/ac | 38.50 | grams/ac | 11.4 | 4.389016 | grams/ac |
| Tactic | 1.025 | g/ml | 0.64 | oz. (volume)/ac | 29.57 | ml/oz. | 18.92 | ml/ac | 19.40 | grams/ac | 63.4 | 12.29828 | grams/ac |
| Gunsmoke | 1.195 | g/ml | 2.56 | oz. (volume)/ac | 29.57 | ml/oz. | 75.70 | ml/ac | 90.46 | grams/ac | 80 | 72.36844 | grams/ac |
| Brox-M | 1.13 | g/ml | 3.2 | oz. (volume)/ac | 29.57 | ml/oz. | 94.62 | ml/ac | 106.93 | grams/ac | 65.7 | 70.2498 | grams/ac |
| Liberate | 0.98 | g/ml | 4.48 | oz. (volume)/ac | 29.57 | ml/oz. | 132.47 | ml/ac | 129.82 | grams/ac | 100 | 129.8241 | grams/ac |
| Unfoamer | 1 | g/ml | 0.66 | oz. (volume)/ac | 29.57 | ml/oz. | 19.52 | ml/ac | 19.52 | grams/ac | 12.5 | 2.439525 | grams/ac |
| Choice | 1.13 | g/ml | 1.28 | oz. (volume)/ac | 29.57 | ml/oz. | 37.85 | ml/ac | 42.77 | grams/ac | 50 | 21.38502 | grams/ac |
| Huskie | 1.14 | g/ml | 3 | oz. (volume)/ac | 29.57 | ml/oz. | 88.71 | ml/ac | 101.13 | grams/ac | 35 | 35.39529 | grams/ac |
| **WW** |  |  |  |  |  |  |  |  |  |  |  |  |  |
| Round Up powemax | 1.3565 | g/ml | 25.6 | oz. (volume)/ac | 29.57 | ml/oz. | 756.99 | ml/ac | 1026.86 | grams/ac | 48.7 | 500.0806 | grams/ac |
| Vendetta | 1.14 | g/ml | 6.4 | oz. (volume)/ac | 29.57 | ml/oz. | 189.25 | ml/ac | 215.74 | grams/ac | 100 | 215.7427 | grams/ac |
| Harmony extra | 1.24 | g/ml | 0.1 | oz. (volume)/ac | 29.57 | ml/oz. | 2.96 | ml/ac | 3.67 | grams/ac | 50 | 1.83334 | grams/ac |
| Affinity Broadspec | 1.21 | g/ml | 0.1 | oz. (volume)/ac | 29.57 | ml/oz. | 2.96 | ml/ac | 3.58 | grams/ac | 50 | 1.788985 | grams/ac |
| Paraquat dichloride | 1.15 | g/ml | 22.2 | oz. (volume)/ac | 29.57 | ml/oz. | 656.45 | ml/ac | 754.92 | grams/ac | 43.2 | 326.1263 | grams/ac |
| Cyclone | 1.1 | g/ml | 25.6 | oz. (volume)/ac | 29.57 | ml/oz. | 756.99 | ml/ac | 832.69 | grams/ac | 30.1 | 250.6401 | grams/ac |
| Gramoxone | 1.12 | g/ml | 12.8 | oz. (volume)/ac | 29.57 | ml/oz. | 378.50 | ml/ac | 423.92 | grams/ac | 25 | 105.9789 | grams/ac |
| Silencer | 0.93 | g/ml | 1.4 | oz. (volume)/ac | 29.57 | ml/oz. | 41.40 | ml/ac | 38.50 | grams/ac | 11.4 | 4.389016 | grams/ac |
| Tactic | 1.025 | g/ml | 0.64 | oz. (volume)/ac | 29.57 | ml/oz. | 18.92 | ml/ac | 19.40 | grams/ac | 63.4 | 12.29828 | grams/ac |
| Huskie | 1.14 | g/ml | 5.6 | oz. (volume)/ac | 29.57 | ml/oz. | 165.59 | ml/ac | 188.77 | grams/ac | 35 | 66.07121 | grams/ac |
| Osprey | 0.92475 | g/ml | 1.9 | oz. (volume)/ac | 29.57 | ml/oz. | 56.18 | ml/ac | 51.96 | grams/ac | 4.5 | 2.337985 | grams/ac |
| Liberate | 0.98 | g/ml | 3.84 | oz. (volume)/ac | 29.57 | ml/oz. | 113.55 | ml/ac | 111.28 | grams/ac | 100 | 111.2778 | grams/ac |
| Fitness | 1.04 | g/ml | 1.2 | oz. (volume)/ac | 29.57 | ml/oz. | 35.48 | ml/ac | 36.90 | grams/ac | 45 | 16.60651 | grams/ac |
| Unfoamer | 1 | g/ml | 0.54 | oz. (volume)/ac | 29.57 | ml/oz. | 15.97 | ml/ac | 15.97 | grams/ac | 12.5 | 1.995975 | grams/ac |
| Gunsmoke | 1.195 | g/ml | 1.92 | oz. (volume)/ac | 29.57 | ml/oz. | 56.77 | ml/ac | 67.85 | grams/ac | 80 | 54.27633 | grams/ac |

Table S23: RTF-WW-SO rotation Conversions of pesticides from fluid ounce to grams

| **RTF** | **Bulk Density from MSDS** | **Units** | **Volume of herbicide applied** | **Units** | **Conversion Factor** | **Units** | **Volume** | **units** | **Mass Herbicide applied** | **units** | **% Active gradient in Herbicide** | **Mass of active gradient** | **units** |
| --- | --- | --- | --- | --- | --- | --- | --- | --- | --- | --- | --- | --- | --- |
| Round Up powemax | 1.3565 | g/ml | 44.8 | oz. (volume)/ac | 29.57 | ml/oz. | 1324.74 | ml/ac | 1797.00 | grams/ac | 48.7 | 875.1411 | grams/ac |
| Round up RT3 | 1.3573 | g/ml | 63.2 | oz. (volume)/ac | 29.57 | ml/oz. | 1868.82 | ml/ac | 2536.55 | grams/ac | 48.8 | 1237.839 | grams/ac |
| Gunsmoke | 1.195 | g/ml | 1.92 | oz. (volume)/ac | 29.57 | ml/oz. | 56.77 | ml/ac | 67.85 | grams/ac | 80 | 54.27633 | grams/ac |
| Affinity Broadspec | 1.21 | g/ml | 0.1 | oz. (volume)/ac | 29.57 | ml/oz. | 2.96 | ml/ac | 3.58 | grams/ac | 50 | 1.788985 | grams/ac |
| Tactic | 1.025 | g/ml | 0.64 | oz. (volume)/ac | 29.57 | ml/oz. | 18.92 | ml/ac | 19.40 | grams/ac | 63.4 | 12.29828 | grams/ac |
| Liberate | 0.98 | g/ml | 3.84 | oz. (volume)/ac | 29.57 | ml/oz. | 113.55 | ml/ac | 111.28 | grams/ac | 100 | 111.2778 | grams/ac |
| Silencer | 0.93 | g/ml | 1.4 | oz. (volume)/ac | 29.57 | ml/oz. | 41.40 | ml/ac | 38.50 | grams/ac | 11.4 | 4.389016 | grams/ac |
| Paraquat dichloride | 1.15 | g/ml | 22.2 | oz. (volume)/ac | 29.57 | ml/oz. | 656.45 | ml/ac | 754.92 | grams/ac | 43.2 | 326.1263 | grams/ac |
| Cyclone | 1.1 | g/ml | 25.6 | oz. (volume)/ac | 29.57 | ml/oz. | 756.99 | ml/ac | 832.69 | grams/ac | 30.1 | 250.6401 | grams/ac |
| Glystar plus | 1.18 | g/ml | 9.6 | oz. (volume)/ac | 29.57 | ml/oz. | 283.87 | ml/ac | 334.97 | grams/ac | 41 | 137.3373 | grams/ac |
| Choice | 1.13 | g/ml | 1.28 | oz. (volume)/ac | 29.57 | ml/oz. | 37.85 | ml/ac | 42.77 | grams/ac | 50 | 21.38502 | grams/ac |
| Unfoamer | 1 | g/ml | 0.36 | oz. (volume)/ac | 29.57 | ml/oz. | 10.65 | ml/ac | 10.65 | grams/ac | 12.5 | 1.33065 | grams/ac |
| Rifle | 1.2 | g/ml | 2.4 | oz. (volume)/ac | 29.57 | ml/oz. | 70.97 | ml/ac | 85.16 | grams/ac | 48.2 | 41.04789 | grams/ac |
| **SO** |  |  |  |  |  |  |  |  |  |  |  |  |  |
| Round Up powemax | 1.3565 | g/ml | 24.8 | oz. (volume)/ac | 29.57 | ml/oz. | 733.34 | ml/ac | 994.77 | grams/ac | 48.7 | 484.4531 | grams/ac |
| Round up RT3 | 1.3573 | g/ml | 16 | oz. (volume)/ac | 29.57 | ml/oz. | 473.12 | ml/ac | 642.17 | grams/ac | 48.8 | 313.3769 | grams/ac |
| Gunsmoke | 1.195 | g/ml | 2.56 | oz. (volume)/ac | 29.57 | ml/oz. | 75.70 | ml/ac | 90.46 | grams/ac | 80 | 72.36844 | grams/ac |
| Liberate | 0.98 | g/ml | 3.2 | oz. (volume)/ac | 29.57 | ml/oz. | 94.62 | ml/ac | 92.73 | grams/ac | 100 | 92.73152 | grams/ac |
| Paraquat dichloride | 1.15 | g/ml | 22.2 | oz. (volume)/ac | 29.57 | ml/oz. | 656.45 | ml/ac | 754.92 | grams/ac | 43.2 | 326.1263 | grams/ac |
| Cyclone | 1.1 | g/ml | 25.6 | oz. (volume)/ac | 29.57 | ml/oz. | 756.99 | ml/ac | 832.69 | grams/ac | 30.1 | 250.6401 | grams/ac |
| Gramoxone | 1.12 | g/ml | 12.8 | oz. (volume)/ac | 29.57 | ml/oz. | 378.50 | ml/ac | 423.92 | grams/ac | 25 | 105.9789 | grams/ac |
| Silencer | 0.93 | g/ml | 1.4 | oz. (volume)/ac | 29.57 | ml/oz. | 41.40 | ml/ac | 38.50 | grams/ac | 11.4 | 4.389016 | grams/ac |
| Tactic | 1.025 | g/ml | 0.64 | oz. (volume)/ac | 29.57 | ml/oz. | 18.92 | ml/ac | 19.40 | grams/ac | 63.4 | 12.29828 | grams/ac |
| Choice | 1.13 | g/ml | 1.28 | oz. (volume)/ac | 29.57 | ml/oz. | 37.85 | ml/ac | 42.77 | grams/ac | 50 | 21.38502 | grams/ac |
| Unfoamer | 1 | g/ml | 0.46 | oz. (volume)/ac | 29.57 | ml/oz. | 13.60 | ml/ac | 13.60 | grams/ac | 12.5 | 1.700275 | grams/ac |
| Glystar plus | 1.18 | g/ml | 9.6 | oz. (volume)/ac | 29.57 | ml/oz. | 283.87 | ml/ac | 334.97 | grams/ac | 41 | 137.3373 | grams/ac |
| Wetcit | 1.02 | g/ml | 2 | oz. (volume)/ac | 29.57 | ml/oz. | 59.14 | ml/ac | 60.32 | grams/ac | 8.15 | 4.916308 | grams/ac |
| Warrior II | 1.1 | g/ml | 1.536 | oz. (volume)/ac | 29.57 | ml/oz. | 45.42 | ml/ac | 49.96 | grams/ac | 22.8 | 11.39122 | grams/ac |
| Landmaster II | 1.13 | g/ml | 10.8 | oz. (volume)/ac | 29.57 | ml/oz. | 319.36 | ml/ac | 360.87 | grams/ac | 33.5 | 120.8922 | grams/ac |
| Assure II | 1.02 | g/ml | 2.4 | oz. (volume)/ac | 29.57 | ml/oz. | 70.97 | ml/ac | 72.39 | grams/ac | 10.3 | 7.455898 | grams/ac |
| Warrior II | 1.1 | g/ml | 0.768 | oz. (volume)/ac | 29.57 | ml/oz. | 22.71 | ml/ac | 24.98 | grams/ac | 22.8 | 5.695608 | grams/ac |
| **WW** |  |  |  |  |  |  |  |  |  |  |  |  |  |
| Round Up powemax | 1.3565 | g/ml | 25.6 | oz. (volume)/ac | 29.57 | ml/oz. | 756.99 | ml/ac | 1026.86 | grams/ac | 48.7 | 500.0806 | grams/ac |
| Vendetta | 1.14 | g/ml | 6.4 | oz. (volume)/ac | 29.57 | ml/oz. | 189.25 | ml/ac | 215.74 | grams/ac | 100 | 215.7427 | grams/ac |
| Harmony extra | 1.24 | g/ml | 0.1 | oz. (volume)/ac | 29.57 | ml/oz. | 2.96 | ml/ac | 3.67 | grams/ac | 50 | 1.83334 | grams/ac |
| Affinity Broadspec | 1.21 | g/ml | 0.1 | oz. (volume)/ac | 29.57 | ml/oz. | 2.96 | ml/ac | 3.58 | grams/ac | 50 | 1.788985 | grams/ac |
| Paraquat dichloride | 1.15 | g/ml | 22.2 | oz. (volume)/ac | 29.57 | ml/oz. | 656.45 | ml/ac | 754.92 | grams/ac | 43.2 | 326.1263 | grams/ac |
| Cyclone | 1.1 | g/ml | 25.6 | oz. (volume)/ac | 29.57 | ml/oz. | 756.99 | ml/ac | 832.69 | grams/ac | 30.1 | 250.6401 | grams/ac |
| Gramoxone | 1.12 | g/ml | 12.8 | oz. (volume)/ac | 29.57 | ml/oz. | 378.50 | ml/ac | 423.92 | grams/ac | 25 | 105.9789 | grams/ac |
| Silencer | 0.93 | g/ml | 1.4 | oz. (volume)/ac | 29.57 | ml/oz. | 41.40 | ml/ac | 38.50 | grams/ac | 11.4 | 4.389016 | grams/ac |
| Tactic | 1.025 | g/ml | 0.64 | oz. (volume)/ac | 29.57 | ml/oz. | 18.92 | ml/ac | 19.40 | grams/ac | 63.4 | 12.29828 | grams/ac |
| Huskie | 1.14 | g/ml | 5.6 | oz. (volume)/ac | 29.57 | ml/oz. | 165.59 | ml/ac | 188.77 | grams/ac | 35 | 66.07121 | grams/ac |
| Osprey | 0.92475 | g/ml | 1.9 | oz. (volume)/ac | 29.57 | ml/oz. | 56.18 | ml/ac | 51.96 | grams/ac | 4.5 | 2.337985 | grams/ac |
| Liberate | 0.98 | g/ml | 3.84 | oz. (volume)/ac | 29.57 | ml/oz. | 113.55 | ml/ac | 111.28 | grams/ac | 100 | 111.2778 | grams/ac |
| Fitness | 1.04 | g/ml | 1.2 | oz. (volume)/ac | 29.57 | ml/oz. | 35.48 | ml/ac | 36.90 | grams/ac | 45 | 16.60651 | grams/ac |
| Unfoamer | 1 | g/ml | 0.54 | oz. (volume)/ac | 29.57 | ml/oz. | 15.97 | ml/ac | 15.97 | grams/ac | 12.5 | 1.995975 | grams/ac |
| Gunsmoke | 1.195 | g/ml | 1.92 | oz. (volume)/ac | 29.57 | ml/oz. | 56.77 | ml/ac | 67.85 | grams/ac | 80 | 54.27633 | grams/ac |

Table S24: RTF-WO-SW rotation Conversions of pesticides from fluid ounce to grams

| **RTF** | **Bulk Density from MSDS** | **Units** | **Volume of herbicide applied** | **Units** | **Conversion Factor** | **units** | **Volume** | **units** | **Mass Herbicide applied** | **units** | **% Active gradient in Herbicide** | **Mass of active gradient** | **Units** |
| --- | --- | --- | --- | --- | --- | --- | --- | --- | --- | --- | --- | --- | --- |
| Round Up powemax | 1.3565 | g/ml | 44.8 | oz. (volume)/ac | 29.57 | ml/oz. | 1324.74 | ml/ac | 1797.00 | grams/ac | 48.7 | 875.1411 | grams/ac |
| Round up RT3 | 1.3573 | g/ml | 63.2 | oz. (volume)/ac | 29.57 | ml/oz. | 1868.82 | ml/ac | 2536.55 | grams/ac | 48.8 | 1237.839 | grams/ac |
| Gunsmoke | 1.195 | g/ml | 1.92 | oz. (volume)/ac | 29.57 | ml/oz. | 56.77 | ml/ac | 67.85 | grams/ac | 80 | 54.27633 | grams/ac |
| Affinity Broadspec | 1.21 | g/ml | 0.1 | oz. (volume)/ac | 29.57 | ml/oz. | 2.96 | ml/ac | 3.58 | grams/ac | 50 | 1.788985 | grams/ac |
| Tactic | 1.025 | g/ml | 0.64 | oz. (volume)/ac | 29.57 | ml/oz. | 18.92 | ml/ac | 19.40 | grams/ac | 63.4 | 12.29828 | grams/ac |
| Liberate | 0.98 | g/ml | 3.84 | oz. (volume)/ac | 29.57 | ml/oz. | 113.55 | ml/ac | 111.28 | grams/ac | 100 | 111.2778 | grams/ac |
| Silencer | 0.93 | g/ml | 1.4 | oz. (volume)/ac | 29.57 | ml/oz. | 41.40 | ml/ac | 38.50 | grams/ac | 11.4 | 4.389016 | grams/ac |
| Paraquat dichloride | 1.15 | g/ml | 22.2 | oz. (volume)/ac | 29.57 | ml/oz. | 656.45 | ml/ac | 754.92 | grams/ac | 43.2 | 326.1263 | grams/ac |
| Cyclone | 1.1 | g/ml | 25.6 | oz. (volume)/ac | 29.57 | ml/oz. | 756.99 | ml/ac | 832.69 | grams/ac | 30.1 | 250.6401 | grams/ac |
| Glystar plus | 1.18 | g/ml | 9.6 | oz. (volume)/ac | 29.57 | ml/oz. | 283.87 | ml/ac | 334.97 | grams/ac | 41 | 137.3373 | grams/ac |
| Choice | 1.13 | g/ml | 1.28 | oz. (volume)/ac | 29.57 | ml/oz. | 37.85 | ml/ac | 42.77 | grams/ac | 50 | 21.38502 | grams/ac |
| Unfoamer | 1 | g/ml | 0.36 | oz. (volume)/ac | 29.57 | ml/oz. | 10.65 | ml/ac | 10.65 | grams/ac | 12.5 | 1.33065 | grams/ac |
| Rifle | 1.2 | g/ml | 2.4 | oz. (volume)/ac | 29.57 | ml/oz. | 70.97 | ml/ac | 85.16 | grams/ac | 48.2 | 41.04789 | grams/ac |
| **WO** |  |  |  |  |  |  |  |  |  |  |  |  |  |
| Round up RT3 | 1.3573 | g/ml | 9.6 | oz. (volume)/ac | 29.57 | ml/oz. | 283.87 | ml/ac | 385.30 | grams/ac | 48.8 | 188.0261 | grams/ac |
| Gunsmoke | 1.195 | g/ml | 2.56 | oz. (volume)/ac | 29.57 | ml/oz. | 75.70 | ml/ac | 90.46 | grams/ac | 80 | 72.36844 | grams/ac |
| Liberate | 0.98 | g/ml | 1.92 | oz. (volume)/ac | 29.57 | ml/oz. | 56.77 | ml/ac | 55.64 | grams/ac | 100 | 55.63891 | grams/ac |
| Paraquat dichloride | 1.15 | g/ml | 12 | oz. (volume)/ac | 29.57 | ml/oz. | 354.84 | ml/ac | 408.07 | grams/ac | 43.2 | 176.2845 | grams/ac |
| Cyclone | 1.1 | g/ml | 25.6 | oz. (volume)/ac | 29.57 | ml/oz. | 756.99 | ml/ac | 832.69 | grams/ac | 30.1 | 250.6401 | grams/ac |
| Gramoxone | 1.12 | g/ml | 12.8 | oz. (volume)/ac | 29.57 | ml/oz. | 378.50 | ml/ac | 423.92 | grams/ac | 25 | 105.9789 | grams/ac |
| Silencer | 0.93 | g/ml | 1.4 | oz. (volume)/ac | 29.57 | ml/oz. | 41.40 | ml/ac | 38.50 | grams/ac | 11.4 | 4.389016 | grams/ac |
| Tactic | 1.025 | g/ml | 0.64 | oz. (volume)/ac | 29.57 | ml/oz. | 18.92 | ml/ac | 19.40 | grams/ac | 63.4 | 12.29828 | grams/ac |
| Unfoamer | 1 | g/ml | 0.3 | oz. (volume)/ac | 29.57 | ml/oz. | 8.87 | ml/ac | 8.87 | grams/ac | 12.5 | 1.108875 | grams/ac |
| Glystar plus | 1.18 | g/ml | 9.6 | oz. (volume)/ac | 29.57 | ml/oz. | 283.87 | ml/ac | 334.97 | grams/ac | 41 | 137.3373 | grams/ac |
| Wetcit | 1.02 | g/ml | 2 | oz. (volume)/ac | 29.57 | ml/oz. | 59.14 | ml/ac | 60.32 | grams/ac | 8.15 | 4.916308 | grams/ac |
| Warrior II | 1.1 | g/ml | 1.536 | oz. (volume)/ac | 29.57 | ml/oz. | 45.42 | ml/ac | 49.96 | grams/ac | 22.8 | 11.39122 | grams/ac |
| **SW** |  |  |  |  |  |  |  |  |  |  |  |  |  |
| Round Up powemax | 1.3565 | g/ml | 31.2 | oz. (volume)/ac | 29.57 | ml/oz. | 922.58 | ml/ac | 1251.49 | grams/ac | 48.7 | 609.4733 | grams/ac |
| Round up RT3 | 1.3573 | g/ml | 16 | oz. (volume)/ac | 29.57 | ml/oz. | 473.12 | ml/ac | 642.17 | grams/ac | 48.8 | 313.3769 | grams/ac |
| Vendetta | 1.14 | g/ml | 5 | oz. (volume)/ac | 29.57 | ml/oz. | 147.85 | ml/ac | 168.55 | grams/ac | 100 | 168.549 | grams/ac |
| Harmony extra | 1.24 | g/ml | 0.1 | oz. (volume)/ac | 29.57 | ml/oz. | 2.96 | ml/ac | 3.67 | grams/ac | 50 | 1.83334 | grams/ac |
| Affinity Broadspec | 1.21 | g/ml | 0.12 | oz. (volume)/ac | 29.57 | ml/oz. | 3.55 | ml/ac | 4.29 | grams/ac | 50 | 2.146782 | grams/ac |
| Paraquat dichloride | 1.15 | g/ml | 22.2 | oz. (volume)/ac | 29.57 | ml/oz. | 656.45 | ml/ac | 754.92 | grams/ac | 43.2 | 326.1263 | grams/ac |
| Cyclone | 1.1 | g/ml | 25.6 | oz. (volume)/ac | 29.57 | ml/oz. | 756.99 | ml/ac | 832.69 | grams/ac | 30.1 | 250.6401 | grams/ac |
| Gramoxone | 1.12 | g/ml | 12.8 | oz. (volume)/ac | 29.57 | ml/oz. | 378.50 | ml/ac | 423.92 | grams/ac | 25 | 105.9789 | grams/ac |
| Silencer | 0.93 | g/ml | 1.4 | oz. (volume)/ac | 29.57 | ml/oz. | 41.40 | ml/ac | 38.50 | grams/ac | 11.4 | 4.389016 | grams/ac |
| Tactic | 1.025 | g/ml | 0.64 | oz. (volume)/ac | 29.57 | ml/oz. | 18.92 | ml/ac | 19.40 | grams/ac | 63.4 | 12.29828 | grams/ac |
| Huskie | 1.14 | g/ml | 3 | oz. (volume)/ac | 29.57 | ml/oz. | 88.71 | ml/ac | 101.13 | grams/ac | 35 | 35.39529 | grams/ac |
| Liberate | 0.98 | g/ml | 4.48 | oz. (volume)/ac | 29.57 | ml/oz. | 132.47 | ml/ac | 129.82 | grams/ac | 100 | 129.8241 | grams/ac |
| Unfoamer | 1 | g/ml | 0.66 | oz. (volume)/ac | 29.57 | ml/oz. | 19.52 | ml/ac | 19.52 | grams/ac | 12.5 | 2.439525 | grams/ac |
| Gunsmoke | 1.195 | g/ml | 2.56 | oz. (volume)/ac | 29.57 | ml/oz. | 75.70 | ml/ac | 90.46 | grams/ac | 80 | 72.36844 | grams/ac |
| Choice | 1.13 | g/ml | 1.28 | oz. (volume)/ac | 29.57 | ml/oz. | 37.85 | ml/ac | 42.77 | grams/ac | 50 | 21.38502 | grams/ac |
| Brox-M | 1.13 | g/ml | 3.2 | oz. (volume)/ac | 29.57 | ml/oz. | 94.62 | ml/ac | 106.93 | grams/ac | 65.7 | 70.2498 | grams/ac |

Table S25: RTF-SW-SO rotation Conversions of pesticides from fluid ounce to grams

| **RTF** | **Bulk Density from MSDS** | **units** | **Volume of herbicide applied** | **Units** | **Conversion Factor** | **Units** | **Volume** | **units** | **Mass Herbicide applied** | **units** | **% Active gradient in Herbicide** | **Mass of active gradient** | **Units** |
| --- | --- | --- | --- | --- | --- | --- | --- | --- | --- | --- | --- | --- | --- |
| Round Up powemax | 1.3565 | g/ml | 44.8 | oz. (volume)/ac | 29.57 | ml/oz. | 1324.74 | ml/ac | 1797.00 | grams/ac | 48.7 | 875.1411 | grams/ac |
| Round up RT3 | 1.3573 | g/ml | 56.8 | oz. (volume)/ac | 29.57 | ml/oz. | 1679.58 | ml/ac | 2279.69 | grams/ac | 48.8 | 1112.488 | grams/ac |
| Gunsmoke | 1.195 | g/ml | 1.92 | oz. (volume)/ac | 29.57 | ml/oz. | 56.77 | ml/ac | 67.85 | grams/ac | 80 | 54.27633 | grams/ac |
| Affinity Broadspec | 1.21 | g/ml | 0.1 | oz. (volume)/ac | 29.57 | ml/oz. | 2.96 | ml/ac | 3.58 | grams/ac | 50 | 1.788985 | grams/ac |
| Tactic | 1.025 | g/ml | 0.64 | oz. (volume)/ac | 29.57 | ml/oz. | 18.92 | ml/ac | 19.40 | grams/ac | 63.4 | 12.29828 | grams/ac |
| Liberate | 0.98 | g/ml | 3.84 | oz. (volume)/ac | 29.57 | ml/oz. | 113.55 | ml/ac | 111.28 | grams/ac | 100 | 111.2778 | grams/ac |
| Silencer | 0.93 | g/ml | 1.4 | oz. (volume)/ac | 29.57 | ml/oz. | 41.40 | ml/ac | 38.50 | grams/ac | 11.4 | 4.389016 | grams/ac |
| Paraquat dichloride | 1.15 | g/ml | 22.2 | oz. (volume)/ac | 29.57 | ml/oz. | 656.45 | ml/ac | 754.92 | grams/ac | 43.2 | 326.1263 | grams/ac |
| Cyclone | 1.1 | g/ml | 25.6 | oz. (volume)/ac | 29.57 | ml/oz. | 756.99 | ml/ac | 832.69 | grams/ac | 30.1 | 250.6401 | grams/ac |
| Glystar plus | 1.18 | g/ml | 9.6 | oz. (volume)/ac | 29.57 | ml/oz. | 283.87 | ml/ac | 334.97 | grams/ac | 41 | 137.3373 | grams/ac |
| Choice | 1.13 | g/ml | 1.28 | oz. (volume)/ac | 29.57 | ml/oz. | 37.85 | ml/ac | 42.77 | grams/ac | 50 | 21.38502 | grams/ac |
| Unfoamer | 1 | g/ml | 0.36 | oz. (volume)/ac | 29.57 | ml/oz. | 10.65 | ml/ac | 10.65 | grams/ac | 12.5 | 1.33065 | grams/ac |
| Rifle | 1.2 | g/ml | 2.4 | oz. (volume)/ac | 29.57 | ml/oz. | 70.97 | ml/ac | 85.16 | grams/ac | 48.2 | 41.04789 | grams/ac |
| **SO** |  |  |  |  |  |  |  |  |  |  |  |  |  |
| Round Up powemax | 1.3565 | g/ml | 24.8 | oz. (volume)/ac | 29.57 | ml/oz. | 733.34 | ml/ac | 994.77 | grams/ac | 48.7 | 484.4531 | grams/ac |
| Round up RT3 | 1.3573 | g/ml | 16 | oz. (volume)/ac | 29.57 | ml/oz. | 473.12 | ml/ac | 642.17 | grams/ac | 48.8 | 313.3769 | grams/ac |
| Gunsmoke | 1.195 | g/ml | 2.56 | oz. (volume)/ac | 29.57 | ml/oz. | 75.70 | ml/ac | 90.46 | grams/ac | 80 | 72.36844 | grams/ac |
| Liberate | 0.98 | g/ml | 3.2 | oz. (volume)/ac | 29.57 | ml/oz. | 94.62 | ml/ac | 92.73 | grams/ac | 100 | 92.73152 | grams/ac |
| Paraquat dichloride | 1.15 | g/ml | 22.2 | oz. (volume)/ac | 29.57 | ml/oz. | 656.45 | ml/ac | 754.92 | grams/ac | 43.2 | 326.1263 | grams/ac |
| Cyclone | 1.1 | g/ml | 25.6 | oz. (volume)/ac | 29.57 | ml/oz. | 756.99 | ml/ac | 832.69 | grams/ac | 30.1 | 250.6401 | grams/ac |
| Gramoxone | 1.12 | g/ml | 12.8 | oz. (volume)/ac | 29.57 | ml/oz. | 378.50 | ml/ac | 423.92 | grams/ac | 25 | 105.9789 | grams/ac |
| Silencer | 0.93 | g/ml | 1.4 | oz. (volume)/ac | 29.57 | ml/oz. | 41.40 | ml/ac | 38.50 | grams/ac | 11.4 | 4.389016 | grams/ac |
| Tactic | 1.025 | g/ml | 0.64 | oz. (volume)/ac | 29.57 | ml/oz. | 18.92 | ml/ac | 19.40 | grams/ac | 63.4 | 12.29828 | grams/ac |
| Choice | 1.13 | g/ml | 1.28 | oz. (volume)/ac | 29.57 | ml/oz. | 37.85 | ml/ac | 42.77 | grams/ac | 50 | 21.38502 | grams/ac |
| Unfoamer | 1 | g/ml | 0.46 | oz. (volume)/ac | 29.57 | ml/oz. | 13.60 | ml/ac | 13.60 | grams/ac | 12.5 | 1.700275 | grams/ac |
| Glystar plus | 1.18 | g/ml | 9.6 | oz. (volume)/ac | 29.57 | ml/oz. | 283.87 | ml/ac | 334.97 | grams/ac | 41 | 137.3373 | grams/ac |
| Wetcit | 1.02 | g/ml | 2 | oz. (volume)/ac | 29.57 | ml/oz. | 59.14 | ml/ac | 60.32 | grams/ac | 8.15 | 4.916308 | grams/ac |
| Warrior II | 1.1 | g/ml | 1.536 | oz. (volume)/ac | 29.57 | ml/oz. | 45.42 | ml/ac | 49.96 | grams/ac | 22.8 | 11.39122 | grams/ac |
| Landmaster II | 1.13 | g/ml | 10.8 | oz. (volume)/ac | 29.57 | ml/oz. | 319.36 | ml/ac | 360.87 | grams/ac | 33.5 | 120.8922 | grams/ac |
| Assure II | 1.02 | g/ml | 2.4 | oz. (volume)/ac | 29.57 | ml/oz. | 70.97 | ml/ac | 72.39 | grams/ac | 10.3 | 7.455898 | grams/ac |
| Warrior II | 1.1 | g/ml | 0.768 | oz. (volume)/ac | 29.57 | ml/oz. | 22.71 | ml/ac | 24.98 | grams/ac | 22.8 | 5.695608 | grams/ac |
| **SW** |  |  |  |  |  |  |  |  |  |  |  |  |  |
| Round Up powemax | 1.3565 | g/ml | 31.2 | oz. (volume)/ac | 29.57 | ml/oz. | 922.58 | ml/ac | 1251.49 | grams/ac | 48.7 | 609.4733 | grams/ac |
| Round up RT3 | 1.3573 | g/ml | 16 | oz. (volume)/ac | 29.57 | ml/oz. | 473.12 | ml/ac | 642.17 | grams/ac | 48.8 | 313.3769 | grams/ac |
| Vendetta | 1.14 | g/ml | 5 | oz. (volume)/ac | 29.57 | ml/oz. | 147.85 | ml/ac | 168.55 | grams/ac | 100 | 168.549 | grams/ac |
| Harmony extra | 1.24 | g/ml | 0.1 | oz. (volume)/ac | 29.57 | ml/oz. | 2.96 | ml/ac | 3.67 | grams/ac | 50 | 1.83334 | grams/ac |
| Affinity Broadspec | 1.21 | g/ml | 0.12 | oz. (volume)/ac | 29.57 | ml/oz. | 3.55 | ml/ac | 4.29 | grams/ac | 50 | 2.146782 | grams/ac |
| Paraquat dichloride | 1.15 | g/ml | 22.2 | oz. (volume)/ac | 29.57 | ml/oz. | 656.45 | ml/ac | 754.92 | grams/ac | 43.2 | 326.1263 | grams/ac |
| Cyclone | 1.1 | g/ml | 25.6 | oz. (volume)/ac | 29.57 | ml/oz. | 756.99 | ml/ac | 832.69 | grams/ac | 30.1 | 250.6401 | grams/ac |
| Gramoxone | 1.12 | g/ml | 12.8 | oz. (volume)/ac | 29.57 | ml/oz. | 378.50 | ml/ac | 423.92 | grams/ac | 25 | 105.9789 | grams/ac |
| Silencer | 0.93 | g/ml | 1.4 | oz. (volume)/ac | 29.57 | ml/oz. | 41.40 | ml/ac | 38.50 | grams/ac | 11.4 | 4.389016 | grams/ac |
| Tactic | 1.025 | g/ml | 0.64 | oz. (volume)/ac | 29.57 | ml/oz. | 18.92 | ml/ac | 19.40 | grams/ac | 63.4 | 12.29828 | grams/ac |
| Huskie | 1.14 | g/ml | 3 | oz. (volume)/ac | 29.57 | ml/oz. | 88.71 | ml/ac | 101.13 | grams/ac | 35 | 35.39529 | grams/ac |
| Liberate | 0.98 | g/ml | 4.48 | oz. (volume)/ac | 29.57 | ml/oz. | 132.47 | ml/ac | 129.82 | grams/ac | 100 | 129.8241 | grams/ac |
| Unfoamer | 1 | g/ml | 0.66 | oz. (volume)/ac | 29.57 | ml/oz. | 19.52 | ml/ac | 19.52 | grams/ac | 12.5 | 2.439525 | grams/ac |
| Gunsmoke | 1.195 | g/ml | 2.56 | oz. (volume)/ac | 29.57 | ml/oz. | 75.70 | ml/ac | 90.46 | grams/ac | 80 | 72.36844 | grams/ac |
| Choice | 1.13 | g/ml | 1.28 | oz. (volume)/ac | 29.57 | ml/oz. | 37.85 | ml/ac | 42.77 | grams/ac | 50 | 21.38502 | grams/ac |
| Brox-M | 1.13 | g/ml | 3.2 | oz. (volume)/ac | 29.57 | ml/oz. | 94.62 | ml/ac | 106.93 | grams/ac | 65.7 | 70.2498 | grams/ac |

Table S26: RTF-WO-ST rotation Conversions of pesticides from fluid ounce to grams

| **RTF** | **Bulk Density from MSDS** | **units** | **Volume of herbicide applied** | **Units** | **Conversion Factor** | **Units** | **Volume** | **units** | **Mass Herbicide applied** | **units** | **% Active gradient in Herbicide** | **Mass of active gradient** | **Units** |
| --- | --- | --- | --- | --- | --- | --- | --- | --- | --- | --- | --- | --- | --- |
| Round Up powemax | 1.3565 | g/ml | 64 | oz. (volume)/ac | 29.57 | ml/oz. | 1892.48 | ml/ac | 2567.15 | grams/ac | 48.7 | 1250.202 | grams/ac |
| Round up RT3 | 1.3573 | g/ml | 63.2 | oz. (volume)/ac | 29.57 | ml/oz. | 1868.82 | ml/ac | 2536.55 | grams/ac | 48.8 | 1237.839 | grams/ac |
| Gunsmoke | 1.195 | g/ml | 1.92 | oz. (volume)/ac | 29.57 | ml/oz. | 56.77 | ml/ac | 67.85 | grams/ac | 80 | 54.27633 | grams/ac |
| Affinity Broadspec | 1.21 | g/ml | 0.1 | oz. (volume)/ac | 29.57 | ml/oz. | 2.96 | ml/ac | 3.58 | grams/ac | 50 | 1.788985 | grams/ac |
| Tactic | 1.025 | g/ml | 0.64 | oz. (volume)/ac | 29.57 | ml/oz. | 18.92 | ml/ac | 19.40 | grams/ac | 63.4 | 12.29828 | grams/ac |
| Liberate | 0.98 | g/ml | 3.84 | oz. (volume)/ac | 29.57 | ml/oz. | 113.55 | ml/ac | 111.28 | grams/ac | 100 | 111.2778 | grams/ac |
| Silencer | 0.93 | g/ml | 1.4 | oz. (volume)/ac | 29.57 | ml/oz. | 41.40 | ml/ac | 38.50 | grams/ac | 11.4 | 4.389016 | grams/ac |
| Paraquat dichloride | 1.15 | g/ml | 22.2 | oz. (volume)/ac | 29.57 | ml/oz. | 656.45 | ml/ac | 754.92 | grams/ac | 43.2 | 326.1263 | grams/ac |
| Cyclone | 1.1 | g/ml | 25.6 | oz. (volume)/ac | 29.57 | ml/oz. | 756.99 | ml/ac | 832.69 | grams/ac | 30.1 | 250.6401 | grams/ac |
| Glystar plus | 1.18 | g/ml | 9.6 | oz. (volume)/ac | 29.57 | ml/oz. | 283.87 | ml/ac | 334.97 | grams/ac | 41 | 137.3373 | grams/ac |
| Choice | 1.13 | g/ml | 1.28 | oz. (volume)/ac | 29.57 | ml/oz. | 37.85 | ml/ac | 42.77 | grams/ac | 50 | 21.38502 | grams/ac |
| Unfoamer | 1 | g/ml | 0.36 | oz. (volume)/ac | 29.57 | ml/oz. | 10.65 | ml/ac | 10.65 | grams/ac | 12.5 | 1.33065 | grams/ac |
| Rifle | 1.2 | g/ml | 2.4 | oz. (volume)/ac | 29.57 | ml/oz. | 70.97 | ml/ac | 85.16 | grams/ac | 48.2 | 41.04789 | grams/ac |
| **WO** |  |  |  |  |  |  |  |  |  |  |  |  |  |
| Round up RT3 | 1.3573 | g/ml | 9.6 | oz. (volume)/ac | 29.57 | ml/oz. | 283.87 | ml/ac | 385.30 | grams/ac | 48.8 | 188.0261 | grams/ac |
| Gunsmoke | 1.195 | g/ml | 2.56 | oz. (volume)/ac | 29.57 | ml/oz. | 75.70 | ml/ac | 90.46 | grams/ac | 80 | 72.36844 | grams/ac |
| Liberate | 0.98 | g/ml | 1.92 | oz. (volume)/ac | 29.57 | ml/oz. | 56.77 | ml/ac | 55.64 | grams/ac | 100 | 55.63891 | grams/ac |
| Paraquat dichloride | 1.15 | g/ml | 12 | oz. (volume)/ac | 29.57 | ml/oz. | 354.84 | ml/ac | 408.07 | grams/ac | 43.2 | 176.2845 | grams/ac |
| Cyclone | 1.1 | g/ml | 25.6 | oz. (volume)/ac | 29.57 | ml/oz. | 756.99 | ml/ac | 832.69 | grams/ac | 30.1 | 250.6401 | grams/ac |
| Gramoxone | 1.12 | g/ml | 12.8 | oz. (volume)/ac | 29.57 | ml/oz. | 378.50 | ml/ac | 423.92 | grams/ac | 25 | 105.9789 | grams/ac |
| Silencer | 0.93 | g/ml | 1.4 | oz. (volume)/ac | 29.57 | ml/oz. | 41.40 | ml/ac | 38.50 | grams/ac | 11.4 | 4.389016 | grams/ac |
| Tactic | 1.025 | g/ml | 0.64 | oz. (volume)/ac | 29.57 | ml/oz. | 18.92 | ml/ac | 19.40 | grams/ac | 63.4 | 12.29828 | grams/ac |
| Unfoamer | 1 | g/ml | 0.3 | oz. (volume)/ac | 29.57 | ml/oz. | 8.87 | ml/ac | 8.87 | grams/ac | 12.5 | 1.108875 | grams/ac |
| Glystar plus | 1.18 | g/ml | 9.6 | oz. (volume)/ac | 29.57 | ml/oz. | 283.87 | ml/ac | 334.97 | grams/ac | 41 | 137.3373 | grams/ac |
| Wetcit | 1.02 | g/ml | 2 | oz. (volume)/ac | 29.57 | ml/oz. | 59.14 | ml/ac | 60.32 | grams/ac | 8.15 | 4.916308 | grams/ac |
| Warrior II | 1.1 | g/ml | 1.536 | oz. (volume)/ac | 29.57 | ml/oz. | 45.42 | ml/ac | 49.96 | grams/ac | 22.8 | 11.39122 | grams/ac |
| **ST** |  |  |  |  |  |  |  |  |  |  |  |  |  |
| Round Up powemax | 1.3565 | g/ml | 31.2 | oz. (volume)/ac | 29.57 | ml/oz. | 922.58 | ml/ac | 1251.49 | grams/ac | 48.7 | 609.4733 | grams/ac |
| Round up RT3 | 1.3573 | g/ml | 16 | oz. (volume)/ac | 29.57 | ml/oz. | 473.12 | ml/ac | 642.17 | grams/ac | 48.8 | 313.3769 | grams/ac |
| Vendetta | 1.14 | g/ml | 5 | oz. (volume)/ac | 29.57 | ml/oz. | 147.85 | ml/ac | 168.55 | grams/ac | 100 | 168.549 | grams/ac |
| Harmony extra | 1.24 | g/ml | 0.1 | oz. (volume)/ac | 29.57 | ml/oz. | 2.96 | ml/ac | 3.67 | grams/ac | 50 | 1.83334 | grams/ac |
| Affinity Broadspec | 1.21 | g/ml | 0.12 | oz. (volume)/ac | 29.57 | ml/oz. | 3.55 | ml/ac | 4.29 | grams/ac | 50 | 2.146782 | grams/ac |
| Paraquat dichloride | 1.15 | g/ml | 22.2 | oz. (volume)/ac | 29.57 | ml/oz. | 656.45 | ml/ac | 754.92 | grams/ac | 43.2 | 326.1263 | grams/ac |
| Cyclone | 1.1 | g/ml | 25.6 | oz. (volume)/ac | 29.57 | ml/oz. | 756.99 | ml/ac | 832.69 | grams/ac | 30.1 | 250.6401 | grams/ac |
| Gramoxone | 1.12 | g/ml | 12.8 | oz. (volume)/ac | 29.57 | ml/oz. | 378.50 | ml/ac | 423.92 | grams/ac | 25 | 105.9789 | grams/ac |
| Silencer | 0.93 | g/ml | 1.4 | oz. (volume)/ac | 29.57 | ml/oz. | 41.40 | ml/ac | 38.50 | grams/ac | 11.4 | 4.389016 | grams/ac |
| Tactic | 1.025 | g/ml | 0.64 | oz. (volume)/ac | 29.57 | ml/oz. | 18.92 | ml/ac | 19.40 | grams/ac | 63.4 | 12.29828 | grams/ac |
| Huskie | 1.14 | g/ml | 3 | oz. (volume)/ac | 29.57 | ml/oz. | 88.71 | ml/ac | 101.13 | grams/ac | 35 | 35.39529 | grams/ac |
| Liberate | 0.98 | g/ml | 4.48 | oz. (volume)/ac | 29.57 | ml/oz. | 132.47 | ml/ac | 129.82 | grams/ac | 100 | 129.8241 | grams/ac |
| Unfoamer | 1 | g/ml | 0.66 | oz. (volume)/ac | 29.57 | ml/oz. | 19.52 | ml/ac | 19.52 | grams/ac | 12.5 | 2.439525 | grams/ac |
| Gunsmoke | 1.195 | g/ml | 2.56 | oz. (volume)/ac | 29.57 | ml/oz. | 75.70 | ml/ac | 90.46 | grams/ac | 80 | 72.36844 | grams/ac |
| Choice | 1.13 | g/ml | 1.28 | oz. (volume)/ac | 29.57 | ml/oz. | 37.85 | ml/ac | 42.77 | grams/ac | 50 | 21.38502 | grams/ac |
| Brox-M | 1.13 | g/ml | 3.2 | oz. (volume)/ac | 29.57 | ml/oz. | 94.62 | ml/ac | 106.93 | grams/ac | 65.7 | 70.2498 | grams/ac |

Table S27: RTF-SO-WT rotation Conversions of pesticides from fluid ounce to grams

| **RTF** | **Bulk Density from MSDS** | **units** | **Volume of herbicide applied** | **Units** | **Conversion Factor** | **units** | **Volume** | **units** | **Mass Herbicide applied** | **units** | **% Active gradient in Herbicide** | **Mass of active gradient** | **Units** |
| --- | --- | --- | --- | --- | --- | --- | --- | --- | --- | --- | --- | --- | --- |
| Round Up powemax | 1.3565 | g/ml | 44.8 | oz. (volume)/ac | 29.57 | ml/oz. | 1324.74 | ml/ac | 1797.00 | grams/ac | 48.7 | 875.141135 | grams/ac |
| Round up RT3 | 1.3573 | g/ml | 63.2 | oz. (volume)/ac | 29.57 | ml/oz. | 1868.82 | ml/ac | 2536.55 | grams/ac | 48.8 | 1237.83875 | grams/ac |
| Gunsmoke | 1.195 | g/ml | 1.92 | oz. (volume)/ac | 29.57 | ml/oz. | 56.77 | ml/ac | 67.85 | grams/ac | 80 | 54.2763264 | grams/ac |
| Affinity Broadspec | 1.21 | g/ml | 0.1 | oz. (volume)/ac | 29.57 | ml/oz. | 2.96 | ml/ac | 3.58 | grams/ac | 50 | 1.788985 | grams/ac |
| Tactic | 1.025 | g/ml | 0.64 | oz. (volume)/ac | 29.57 | ml/oz. | 18.92 | ml/ac | 19.40 | grams/ac | 63.4 | 12.29828128 | grams/ac |
| Liberate | 0.98 | g/ml | 3.84 | oz. (volume)/ac | 29.57 | ml/oz. | 113.55 | ml/ac | 111.28 | grams/ac | 100 | 111.277824 | grams/ac |
| Silencer | 0.93 | g/ml | 1.4 | oz. (volume)/ac | 29.57 | ml/oz. | 41.40 | ml/ac | 38.50 | grams/ac | 11.4 | 4.38901596 | grams/ac |
| Paraquat dichloride | 1.15 | g/ml | 22.2 | oz. (volume)/ac | 29.57 | ml/oz. | 656.45 | ml/ac | 754.92 | grams/ac | 43.2 | 326.1263472 | grams/ac |
| Cyclone | 1.1 | g/ml | 25.6 | oz. (volume)/ac | 29.57 | ml/oz. | 756.99 | ml/ac | 832.69 | grams/ac | 30.1 | 250.6400512 | grams/ac |
| Glystar plus | 1.18 | g/ml | 9.6 | oz. (volume)/ac | 29.57 | ml/oz. | 283.87 | ml/ac | 334.97 | grams/ac | 41 | 137.3372736 | grams/ac |
| Choice | 1.13 | g/ml | 1.28 | oz. (volume)/ac | 29.57 | ml/oz. | 37.85 | ml/ac | 42.77 | grams/ac | 50 | 21.385024 | grams/ac |
| Unfoamer | 1 | g/ml | 0.36 | oz. (volume)/ac | 29.57 | ml/oz. | 10.65 | ml/ac | 10.65 | grams/ac | 12.5 | 1.33065 | grams/ac |
| Rifle | 1.2 | g/ml | 2.4 | oz. (volume)/ac | 29.57 | ml/oz. | 70.97 | ml/ac | 85.16 | grams/ac | 48.2 | 41.0478912 | grams/ac |
| **SO** |  |  |  |  |  |  |  |  |  |  |  |  |  |
| Round Up powemax | 1.3565 | g/ml | 24.8 | oz. (volume)/ac | 29.57 | ml/oz. | 733.34 | ml/ac | 994.77 | grams/ac | 48.7 | 484.4531283 | grams/ac |
| Round up RT3 | 1.3573 | g/ml | 16 | oz. (volume)/ac | 29.57 | ml/oz. | 473.12 | ml/ac | 642.17 | grams/ac | 48.8 | 313.3768987 | grams/ac |
| Gunsmoke | 1.195 | g/ml | 2.56 | oz. (volume)/ac | 29.57 | ml/oz. | 75.70 | ml/ac | 90.46 | grams/ac | 80 | 72.3684352 | grams/ac |
| Liberate | 0.98 | g/ml | 3.2 | oz. (volume)/ac | 29.57 | ml/oz. | 94.62 | ml/ac | 92.73 | grams/ac | 100 | 92.73152 | grams/ac |
| Paraquat dichloride | 1.15 | g/ml | 22.2 | oz. (volume)/ac | 29.57 | ml/oz. | 656.45 | ml/ac | 754.92 | grams/ac | 43.2 | 326.1263472 | grams/ac |
| Cyclone | 1.1 | g/ml | 25.6 | oz. (volume)/ac | 29.57 | ml/oz. | 756.99 | ml/ac | 832.69 | grams/ac | 30.1 | 250.6400512 | grams/ac |
| Gramoxone | 1.12 | g/ml | 12.8 | oz. (volume)/ac | 29.57 | ml/oz. | 378.50 | ml/ac | 423.92 | grams/ac | 25 | 105.97888 | grams/ac |
| Silencer | 0.93 | g/ml | 1.4 | oz. (volume)/ac | 29.57 | ml/oz. | 41.40 | ml/ac | 38.50 | grams/ac | 11.4 | 4.38901596 | grams/ac |
| Tactic | 1.025 | g/ml | 0.64 | oz. (volume)/ac | 29.57 | ml/oz. | 18.92 | ml/ac | 19.40 | grams/ac | 63.4 | 12.29828128 | grams/ac |
| Choice | 1.13 | g/ml | 1.28 | oz. (volume)/ac | 29.57 | ml/oz. | 37.85 | ml/ac | 42.77 | grams/ac | 50 | 21.385024 | grams/ac |
| Unfoamer | 1 | g/ml | 0.46 | oz. (volume)/ac | 29.57 | ml/oz. | 13.60 | ml/ac | 13.60 | grams/ac | 12.5 | 1.700275 | grams/ac |
| Glystar plus | 1.18 | g/ml | 9.6 | oz. (volume)/ac | 29.57 | ml/oz. | 283.87 | ml/ac | 334.97 | grams/ac | 41 | 137.3372736 | grams/ac |
| Wetcit | 1.02 | g/ml | 2 | oz. (volume)/ac | 29.57 | ml/oz. | 59.14 | ml/ac | 60.32 | grams/ac | 8.15 | 4.9163082 | grams/ac |
| Warrior II | 1.1 | g/ml | 1.536 | oz. (volume)/ac | 29.57 | ml/oz. | 45.42 | ml/ac | 49.96 | grams/ac | 22.8 | 11.39121562 | grams/ac |
| Landmaster II | 1.13 | g/ml | 10.8 | oz. (volume)/ac | 29.57 | ml/oz. | 319.36 | ml/ac | 360.87 | grams/ac | 33.5 | 120.8922138 | grams/ac |
| Assure II | 1.02 | g/ml | 2.4 | oz. (volume)/ac | 29.57 | ml/oz. | 70.97 | ml/ac | 72.39 | grams/ac | 10.3 | 7.45589808 | grams/ac |
| Warrior II | 1.1 | g/ml | 0.768 | oz. (volume)/ac | 29.57 | ml/oz. | 22.71 | ml/ac | 24.98 | grams/ac | 22.8 | 5.695607808 | grams/ac |
| **WT** |  |  |  |  |  |  |  |  |  |  |  |  |  |
| Round Up powemax | 1.3565 | g/ml | 25.6 | oz. (volume)/ac | 29.57 | ml/oz. | 756.99 | ml/ac | 1026.86 | grams/ac | 48.7 | 500.0806486 | grams/ac |
| Vendetta | 1.14 | g/ml | 6.4 | oz. (volume)/ac | 29.57 | ml/oz. | 189.25 | ml/ac | 215.74 | grams/ac | 100 | 215.74272 | grams/ac |
| Harmony extra | 1.24 | g/ml | 0.1 | oz. (volume)/ac | 29.57 | ml/oz. | 2.96 | ml/ac | 3.67 | grams/ac | 50 | 1.83334 | grams/ac |
| Affinity Broadspec | 1.21 | g/ml | 0.1 | oz. (volume)/ac | 29.57 | ml/oz. | 2.96 | ml/ac | 3.58 | grams/ac | 50 | 1.788985 | grams/ac |
| Paraquat dichloride | 1.15 | g/ml | 22.2 | oz. (volume)/ac | 29.57 | ml/oz. | 656.45 | ml/ac | 754.92 | grams/ac | 43.2 | 326.1263472 | grams/ac |
| Cyclone | 1.1 | g/ml | 25.6 | oz. (volume)/ac | 29.57 | ml/oz. | 756.99 | ml/ac | 832.69 | grams/ac | 30.1 | 250.6400512 | grams/ac |
| Gramoxone | 1.12 | g/ml | 12.8 | oz. (volume)/ac | 29.57 | ml/oz. | 378.50 | ml/ac | 423.92 | grams/ac | 25 | 105.97888 | grams/ac |
| Silencer | 0.93 | g/ml | 1.4 | oz. (volume)/ac | 29.57 | ml/oz. | 41.40 | ml/ac | 38.50 | grams/ac | 11.4 | 4.38901596 | grams/ac |
| Tactic | 1.025 | g/ml | 0.64 | oz. (volume)/ac | 29.57 | ml/oz. | 18.92 | ml/ac | 19.40 | grams/ac | 63.4 | 12.29828128 | grams/ac |
| Huskie | 1.14 | g/ml | 5.6 | oz. (volume)/ac | 29.57 | ml/oz. | 165.59 | ml/ac | 188.77 | grams/ac | 35 | 66.071208 | grams/ac |
| Liberate | 0.98 | g/ml | 3.84 | oz. (volume)/ac | 29.57 | ml/oz. | 113.55 | ml/ac | 111.28 | grams/ac | 100 | 111.277824 | grams/ac |
| Unfoamer | 1 | g/ml | 0.54 | oz. (volume)/ac | 29.57 | ml/oz. | 15.97 | ml/ac | 15.97 | grams/ac | 12.5 | 1.995975 | grams/ac |
| Gunsmoke | 1.195 | g/ml | 1.92 | oz. (volume)/ac | 29.57 | ml/oz. | 56.77 | ml/ac | 67.85 | grams/ac | 80 | 54.2763264 | grams/ac |
| Osprey | 0.92475 | g/ml | 0.95 | oz. (volume)/ac | 29.57 | ml/oz. | 28.09 | ml/ac | 25.98 | grams/ac | 4.5 | 1.168992658 | grams/ac |
| Fitness | 1.04 | g/ml | 1.2 | oz. (volume)/ac | 29.57 | ml/oz. | 35.48 | ml/ac | 36.90 | grams/ac | 45 | 16.606512 | grams/ac |

**Section 2A** contains the all the eco profiles used and created to carry out the analysis using SimaPro. Tables 21-42 are the inputs used in SimaPro on per acre basis using the information from **sections 1B and 1C**.

**Table of Content for Section 2A**

| **Table No** | **Content** | **Page no** |
| --- | --- | --- |
| S28 | Inputs to Simapro for the rotation SF-WW based on per acre (refer table 1 section 2a for pesticide conversions) | 53 |
| S29 | Inputs to Simapro for the rotation RTF-WW based on per acre (refer table 1 section 2a for pesticide conversions) | 55 |
| S30 | Inputs to Simapro for the rotation RTF-WW (RTF-WW-RTF-WO) based on per acre (refer table 1 section 2a for pesticide conversions) | 57 |
| S31 | Inputs to Simapro for the rotation RTF-WO (RTF-WO -WW-RTF) based on per acre (refer table 1 section 2a for pesticide conversions) | 59 |
| S32 | Inputs to Simapro for Reduced tillage fallow (RTF-WW-SB) based on per acre (refer table 1 section 2a for pesticide conversions) | 60 |
| S33 | Inputs to Simapro for Spring Barley (RTF-WW-SB) based on per acre (refer table 1 section 2a for pesticide conversions) | 61 |
| S34 | Inputs to Simapro for Winter wheat (RTF-WW-SB) based on per acre (refer table 1 section 2a for pesticide conversions) | 63 |
| S35 | Inputs to Simapro for Reduced tillage fallow based on per acre (table 1 section 2a for pesticide conversions) | 64 |
| S36 | Inputs to Simapro for spring oilseed (RTF-WW-SO) based on per acre (refer table 1 section 2a for pesticide conversions) | 65 |
| S37 | Inputs to Simapro for winter wheat (RTF-WW-SO) based on per acre (refer table 1 section 2a for pesticide conversions) | 67 |
| S38 | Inputs to Simapro for reduced tillage fallow (RTF-WO-SW) based on per acre (refer table 1 section 2a for pesticide conversions) | 69 |
| S39 | Inputs to Simapro for spring wheat (RTF-WO-SW) based on per acre (refer table 1 section 2a for pesticide conversions) | 70 |
| S40 | Inputs to Simapro for winter oilseed (RTF-WO-SW) based on per acre (refer table 1 section 2a for pesticide conversions) | 71 |
| S41 | Inputs to Simapro for reduced tillage fallow (RTF-SO-SW) based on per acre (refer table 1 section 2a for pesticide conversions) | 72 |
| S42 | Inputs to Simapro for spring oilseed (RTF-SO-SW) based on per acre (refer table 1 section 2a for pesticide conversions) | 74 |
| S43 | Inputs to Simapro for spring wheat (RTF-SO-SW) based on per acre (refer table 1 section 2a for pesticide conversions) | 76 |
| S44 | Inputs to Simapro for reduced tillage fallow (RTF-WO-ST) based on per acre (refer table 1 section 2a for pesticide conversions) | 77 |
| S45 | Inputs to Simapro for spring triticale (RTF-WO-ST) based on per acre (refer table 1 section 2a for pesticide conversions) | 78 |
| S46 | Inputs to Simapro for winter oilseed (RTF-WO-ST) based on per acre (refer table 1 section 2a for pesticide conversions) | 80 |
| S47 | Inputs to Simapro for reduced tillage fallow (RTF-WT-SO) based on per acre (refer table 1 section 2a for pesticide conversions) | 81 |
| S48 | Inputs to Simapro for spring oilseed (RTF-WT-SO) based on per acre (refer table 1 section 2a for pesticide conversions) | 83 |
| S49 | Inputs to Simapro for winter triticale (RTF-WT-SO) based on per acre (refer table 1 section 2a for pesticide conversions) | 85 |

Table S28: Inputs to Simapro for the rotation SF-WW based on per acre (refer table 1 section 2a for pesticide conversions)

| **Materials/Assemblies** | **Calculations** | **Unit** | **Remarks** |
| --- | --- | --- | --- |
| Wheat seed, for sowing {GLO}| market for | Alloc Def, S | 114.75 | lb. | Average seed rate 114.75 lb. /acre per year; |
| Nitrogen fertiliser, as N {RER}| urea ammonium nitrate production | Alloc Def, S | 55 | lb. | 79% UAN in 196 lb. /acre applied every year and on an average of 55 lb. as N per year; |
| Glyphosate {GLO}| market for | Alloc Def, S | 1313.54 | g | 48.7% glyphosate in Roundup powermax; 48.8% glyphosate in Round up RT3; average round up powermax per year is 51.2 oz./acre and average roundup RT3 is 16 oz./acre per year; |
| Pesticide, unspecified {GLO}| market for | Alloc Def, S | 215.75 | g | 100% Active; Average Vendetta applied per year is 6.4 oz./ acre |
| Pesticide, unspecified {GLO}| market for | Alloc Def, S | 1.83 | g | 50% Active; Average Harmony is 0.1 oz./acre per year |
| Pesticide, unspecified {GLO}| market for | Alloc Def, S | 72.37 | g | 80% of gun smoke is Pesticide; Average Gun smoke applied per year is 2.56 oz./ acre; |
| Pesticide, unspecified {GLO}| market for | Alloc Def, S | 1.78 | g | 50% active; Average Affinity broad spec applied per year is 0.1 oz./ acre; |
| Ethoxylated alcohol (AE3) {GLO}| market for | Alloc Def, S | 148.37 | g | Liberate - 100% ethoxylated alcohol; Average Liberate applied per year is 5.12 oz./ acre; |
| Pesticide, unspecified {GLO}| market for | Alloc Def, S | 2.33 | g | Osprey- 4.5% Meso-sulfuron; Average Osprey applied per year is 1.9 oz./ acre; |
| Pesticide, unspecified {GLO}| market for | Alloc Def, S | 16.6 | g | Fitness - 45% propiconazole; Average Fitness applied per year is 1.2 oz./ acre; |
| Diesel, low-sulfur {RoW}| market for | Alloc Def, S | 20.31 | kg | 24.42 liter/acre; 0.832 kg/liter |
| Sodium sulfate, anhydrite {RER}| market for | Alloc Def, S | 52.14 | lb. | Average of 41.16 lb./acre thiosulfate per year; thiosulfate Mol. wt. - 112.128; Mol. wt. sodium sulfate- 142.04; |
| Dry_land_field_emissions_N2O-2A | 55 | lb. | 55 lbs. N per year on average |
| Dry_land_field_emissions_CO2 | 54.19 | lb. | 54.194 lbs. of urea/acre; 196 lbs. /acre of fertilizer; 71% UAN=154.84; 35% Urea by weight=54.194 lbs. |
| Pesticide, unspecified {GLO}| market for | Alloc Def, S | 66.07 | g | 35% active pesticide; Average Huskie per year is 5.6 oz./acre; |
| Pesticide, unspecified {GLO}| dichloropropene to generic market for | Alloc Def, S | 1134.19 | g | 43.2% Paraquat dichloride in Paraquat concentrated(PC) and 30.1 % paraquat dichloride in cyclone and 25% Paraquat dichloride in Gram Oxone; Average PC per year is 44.4 oz./acre; Average Cyclone per year is 38.4 oz./acre; Average Gram Oxone per year is 12.8 oz./acre; |
| Pesticide, unspecified {GLO}| market for | Alloc Def, S | 8.77 | g | Silencer- 11.4% is pesticide; Average Silencer per year is 2.8 oz./acre; |
| Latex {GLO}| market for | Alloc Def, S | 24.59 | g | 63.4% active in Tactic; average application-1.28 oz./acre; |
| Gasoline {RoW}| market for | Alloc Def, S | 0.29 | kg | 0.38658 liter/acre avgas, 0.77 density of Gasoline |
| CO2_combustion emissions from Gasoline | 0.29 | kg | 0.38658 liter/acre avgas, 0.77 density of Gasoline |
| Pesticide, unspecified {GLO}| market for | Alloc Def, S | 21.38 | g | 50% of Choice is active pesticide; average choice per year is 1.28 oz./acre; |
| Nitrogen fertiliser, as N {RER}| urea ammonium nitrate production | Alloc Def, S | 0.256 | lb. | Average Solution 32 per year is 0.256 lb./acre |
| Pesticide, unspecified {GLO}| market for | Alloc Def, S | 2.587 | g | Average Unfoamer per year 0.7 oz./acre; Unfoamer- 12.5% active pesticide; |
| Dry_land_field_emissions_CH4-2A | 55 | lb. | 55 lbs. N is applied per year on average |
| **Processes** |  |  |  |
| Diesel Combustion Emissions | 20.31744 | kg | 24.42 liter/acre; Density 0.832 kg/liter |

Table S29: Inputs to Simapro for the rotation RTF-WW based on per acre (refer table 1 section 2a for pesticide conversions)

| **Materials/Assemblies** | **Calculations** | **Unit** | **Remarks** |
| --- | --- | --- | --- |
| Wheat seed, for sowing {GLO}| market for | Alloc Def, S | 114.75 | lb. | Average seed rate 114.75 lb./acre per year |
| Nitrogen fertiliser, as N {RER}| urea ammonium nitrate production | Alloc Def, S | 55 | lb. | 79% UAN of 196 lb./acre applied every year and on an average of 55 lb. as N per year |
| Glyphosate {GLO}| market for | Alloc Def, S | 2612.8 | g | 48.7% glyphosate in Roundup powermax; 48.8% glyphosate in Round up RT3; average round up powermax per year is 70.4 oz./ acre and average roundup RT3 is 63.2 oz./acre. |
| Pesticide, unspecified {GLO}| market for | Alloc Def, S | 215.74 | g | 100% active; Average Vendetta applied per year is 6.4 oz./ acre |
| Pesticide, unspecified {GLO}| market for | Alloc Def, S | 1.83 | g | 50% active; Average Harmony per year is 0.1 oz./acre |
| Pesticide, unspecified {GLO}| market for | Alloc Def, S | 108.55 | g | 80% of gun smoke is Pesticide; Average Gun smoke applied per year is 3.84 oz./ acre |
| Pesticide, unspecified {GLO}| market for | Alloc Def, S | 19.67 | g | 50% active; Average Affinity broad spec applied per year is 1.1 oz./ acre |
| Ethoxylated alcohol (AE3) {GLO}| market for | Alloc Def, S | 222.55 | g | Liberate - 100% Ethoxylated Alcohol; Average Liberate applied per year is 7.68 oz./ acre |
| Pesticide, unspecified {GLO}| market for | Alloc Def, S | 2.33 | g | Osprey- 4.5% Meso-sulfuron; Average Osprey applied per year is 1.9 oz./ acre |
| Pesticide, unspecified {GLO}| market for | Alloc Def, S | 16.60 | g | Fitness - 45% propiconazole; Average Fitness applied per year is 1.2 oz./ acre |
| Diesel, low-sulfur {RoW}| market for | Alloc Def, S | 15.04 | kg | 18.077 liter/acre; 0.832 kg/liter |
| Sodium sulfate, anhydrite {RER}| market for | Alloc Def, S | 52.14 | lb. | Average of 41.16 lb./acre thiosulfate per year; Thiosulfate Mol. wt. - 112.128; Mol. wt. sodium sulfate- 142.04; |
| Dry_land_field_emissions_N2O-2B | 55 | lb. | 55lbs N per year on average |
| Dry_land_field_emissions_CO2 | 54.19 | lb. | 54.194 lbs. of urea/acre; 196 lbs. /acre of fertilizer; 71% UAN=154.84; 35% Urea by weight=54.194 lbs. |
| Pesticide, unspecified {GLO}| market for | Alloc Def, S | 66.07 | g | 35% active pesticide; Average Huskie per year is 5.6 oz./acre |
| Pesticide, unspecified {GLO}| dichloropropene to generic market for | Alloc Def, S | 1259.51 | g | 43.2% Paraquat dichloride in Paraquat concentrated(PC) and 30.1% paraquat dichloride in cyclone and 25% Paraquat dichloride in Gram Oxone; Average PC per year is 44.4 oz./acre; Average Cyclone per year is 51.2 oz./acre; Average Gram Oxone per year is 12.8 oz./acre; |
| Pesticide, unspecified {GLO}| market for | Alloc Def, S | 8.778032 | g | Silencer- 11.4% is pesticide; Average Silencer per year is 2.8 oz./acre |
| Latex {GLO}| market for | Alloc Def, S | 24.59656 | g | Tactic - 63.4% latex, Average Tactic per year is 1.28 oz./acre |
| Gasoline {RoW}| market for | Alloc Def, S | 0.36883 | kg | 0.479 liter/acre avgas, 0.77 density of Gasoline |
| CO2_combustion emissions from Gasoline | 0.36883 | kg | 0.479 liter/acre avgas, 0.77 density of Gasoline |
| Pesticide, unspecified {GLO}| market for | Alloc Def, S | 21.38502 | g | 50% of choice is active pesticide; average choice per year is 1.28 oz/acre |
| Nitrogen fertiliser, as N {RER}| urea ammonium nitrate production | Alloc Def, S | 0.256 | lb. | Average solution 32 per year is 12.8 oz./acre; 1.28 lb./64 oz.; 0.256 lb./acre |
| Pesticide, unspecified {GLO}| market for | Alloc Def, S | 3.326625 | g | Average Unfoamer per year is 0.9 oz./acre; Unfoamer- 12.5% active pesticide |
| Glyphosate {GLO}| market for | Alloc Def, S | 137.3373 | g | 9.6 oz./ac of Glystar plus and 41% of glystar is glyphosate |
| Pesticide, unspecified {GLO}| market for | Alloc Def, S | 41.04789 | g | 48.2% active dicamba; average Rifle per year is 2.4 oz./acre |
| Dry_land_field_emissions_CH4-2B | 55 | lb. | 55 lbs. N per year on average |
| **Processes** |  |  |  |
| Diesel Combustion Emissions | 15.040064 | kg | 18.077 liter/acre; 0.832 kg/liter |

Table S30: Inputs to Simapro for the rotation RTF-WW (RTF-WW-RTF-WO) based on per acre (refer Table S1 section 2a for pesticide conversions)

| **Materials/Assemblies** | **Calculations** | **Units** | **Remarks** |
| --- | --- | --- | --- |
| Wheat seed, for sowing {GLO}| market for | Alloc Def, S | 114.75 | lb. | Average seed rate 114.75 lbs. /acre per year |
| Nitrogen fertiliser, as N {RER}| urea ammonium nitrate production | Alloc Def, S | 55 | lb. | 79% UAN of 196 lb./acre applied every year and on an average of 55 lb. as N per year |
| Glyphosate {GLO}| market for | Alloc Def, S | 2613.06 | g | 48.7% glyphosate in Roundup powermax 48.8% glyphosate in Round up RT3; average round up powermax per year is 70.4 oz./acre and average roundup RT3 per year is 63.2 oz./acre. |
| Pesticide, unspecified {GLO}| market for | Alloc Def, S | 215.74 | g | 100% Average Vendetta applied per year is 6.4 oz./ acre |
| Pesticide, unspecified {GLO}| market for | Alloc Def, S | 1.83 | g | 50% Average Harmony per year is 0.1 oz./acre |
| Pesticide, unspecified {GLO}| market for | Alloc Def, S | 108.55 | g | 80% of gun smoke is Pesticide; Average Gun smoke applied per year is 3.84 oz./ acre |
| Pesticide, unspecified {GLO}| market for | Alloc Def, S | 3.57 | g | 50% Average Affinity broad spec applied per year is 0.2 oz./ acre |
| Ethoxylated alcohol (AE3) {GLO}| market for | Alloc Def, S | 222.55 | g | Liberate - 100% ethoxylated alcohol; Average Liberate applied per year is 7.68 oz./ acre |
| Pesticide, unspecified {GLO}| market for | Alloc Def, S | 2.33 | g | Osprey- 4.5% Meso-sulfuron; Average Osprey applied per year is 1.9 oz./ acre |
| Pesticide, unspecified {GLO}| market for | Alloc Def, S | 16.6 | g | Fitness - 45% propiconazole; Average Fitness applied per year is 1.2 oz./ acre |
| Diesel, low-sulfur {RoW}| market for | Alloc Def, S | 15.04 | kg | 18.077 liter/acre; 0.832 kg/ liter |
| Sodium sulfate, anhydrite {RER}| market for | Alloc Def, S | 52.14 | lb. | Average of 41.16 lb./acre thiosulfate per year; Thiosulfate Mol. wt. - 112.128; Mol. wt. sodium sulfate- 142.04; |
| Dry_land_field_emissions_N2O-2C1 | 55 | lb. | 55 lbs. N per year on average |
| Dry_land_field_emissions_CO2 | 54.19 | lb. | 54.194 lbs. of urea/acre; 196 lbs. /acre of fertilizer; 71% UAN=154.84 lbs.; 35% Urea by weight=54.194 lbs. |
| Pesticide, unspecified {GLO}| market for | Alloc Def, S | 66.07 | g | 35% active pesticide; Average Huskie per year is 5.6 oz./acre |
| Pesticide, unspecified {GLO}| dichloropropene to generic market for | Alloc Def, S | 1259.51 | g | 43.2% Paraquat dichloride in Paraquat concentrated(PC) and 30.1 % paraquat dichloride in cyclone and 25% Paraquat dichloride in Gram Oxone; Average PC per year is 44.4 oz./acre; Average Cyclone per year is 51.2 oz./acre; Average Gram Oxone is 12.8 Oz/acre |
| Pesticide, unspecified {GLO}| market for | Alloc Def, S | 8.77 | g | Silencer- 11.4% is pesticide; Average Silencer per year is 2.8 oz./acre |
| Latex {GLO}| market for | Alloc Def, S | 24.59 | g | Tactic - 63.4% latex, Average Tactic per year is 1.28 oz./acre |
| Gasoline {RoW}| market for | Alloc Def, S | 0.35 | kg | 0.458 liter/acre avgas, 0.77 density of Gasoline |
| CO2_combustion emissions from Gasoline | 0.35 | kg | 0.458 liter/acre avgas, 0.77 density of Gasoline |
| Pesticide, unspecified {GLO}| market for | Alloc Def, S | 21.38 | g | 50% of choice is active pesticide; average choice per year is 1.28 oz./acre |
| Nitrogen fertiliser, as N {RER}| urea ammonium nitrate production | Alloc Def, S | 0.25 | lb. | Average solution 32 per year 12.8 oz. /acre; 1.28 lb. /64 oz.; 0.256 lb. /acre. |
| Pesticide, unspecified {GLO}| market for | Alloc Def, S | 3.32 | g | Average Unfoamer per year 0.9 oz./acre;  Unfoamer- 12.5% active pesticide |
| Glyphosate {GLO}| market for | Alloc Def, S | 137.33 | g | 9.6 oz./ac of Glystar plus per year and 41% of glystar is glyphosate |
| Dicamba, at regional storehouse/US- US-EI U | 41.04 | g | 48.2% active dicamba; average Rifle 2.4 oz./acre per year |
| Dry_land_field_emissions_CH4-2C1 | 55 | lb. | 55 lbs. N per year on average |
| **Processes** |  |  |  |
| Diesel Combustion Emissions | 15.04 | kg | 18.077 liter/acre; 0.832 kg/liter |

Table 31: Inputs to Simapro for the rotation RTF-WO (RTF-WO-RTF-WW) based on per acre (refer Table S1 section 2a for pesticide conversions)

| **Materials/Assemblies** | **Calculations** | **Units** | **Remarks** |
| --- | --- | --- | --- |
| Sunflower seed, for sowing {GLO}| market for | Alloc Def, S | 5.46 | lb. | Average seed rate 5.464 lb./acre per year |
| Nitrogen fertiliser, as N {RER}| urea ammonium nitrate production | Alloc Def, S | 55 | lb. | 79% UAN of 196 lb./acre applied every year and on an average of 55 lb. as N per year |
| Glyphosate {GLO}| market for | Alloc Def, S | 2050.30 | g | 48.7% glyphosate in Roundup powermax 48.8% glyphosate in Round up RT3; average round up powermax per year 44.8 oz./acre and average roundup RT3 is 60 oz./acre per year. |
| Pesticide, unspecified {GLO}| market for | Alloc Def, S | 126.64 | g | 80% of gun smoke is Pesticide; Average Gun smoke applied per year is 4.48 oz./ acre |
| Pesticide, unspecified {GLO}| market for | Alloc Def, S | 1.788 | g | 50% active; Average Affinity broad spec applied per year is 0.1 oz./ acre |
| Ethoxylated alcohol (AE3) {GLO}| market for | Alloc Def, S | 166.91 | g | Liberate - 100% ethoxylated alcohol; Average Liberate applied per year is 5.76 oz./ acre |
| Diesel, low-sulfur {RoW}| market for | Alloc Def, S | 13.93 | kg | 16.752 liter/acre; 0.832 kg/ liter |
| Sodium sulfate, anhydrite {RER}| market for | Alloc Def, S | 52.14 | lb. | Average of 41.16 lb./acre thiosulfate per year; Thiosulfate Mol. wt. - 112.1282; Mol. wt. sodium sulfate- 142.04; |
| Dry_land_field_emissions_N2O-2C2 | 55 | lb. | 55 lbs. N on average per year |
| Dry_land_field_emissions_CO2 | 54.19 | lb. | 54.194 lbs. of urea/acre; 196 lbs. /acre of fertilizer; 71% UAN=154.84; 35% Urea by weight=54.194 lbs. |
| Pesticide, unspecified {GLO}| dichloropropene to generic market for | Alloc Def, S | 858.9 | g | 43.2% Paraquat dichloride in Paraquat concentrated(PC) and 30.1 % paraquat dichloride in cyclone and 25% Paraquat dichloride in Gram Oxone; Average PC per year is 34.2 oz./acre; Average Cyclone per year is 25.6 oz./acre; Average Gram Oxone is 12.8 oz./acre |
| Pesticide, unspecified {GLO}| market for | Alloc Def, S | 4.38 | g | Silencer- 11.4% is pesticide; Average Silencer per year is 1.4 oz./acre |
| Latex {GLO}| market for | Alloc Def, S | 12.29 | g | Tactic - 63.4% latex, Average Tactic per year is 0.64 oz./acre |
| Gasoline {RoW}| market for | Alloc Def, S | 0.13 | kg | 0.172 liter/acre avgas, 0.77 density of Gasoline |
| CO2_combustion emissions from Gasoline | 0.13 | kg | 0.172 liter/acre avgas, 0.77 density of Gasoline |
| Pesticide, unspecified {GLO}| market for | Alloc Def, S | 21.38 | g | 50% of choice is active pesticide; average choice per year is 1.28 oz./acre |
| Pesticide, unspecified {GLO}| market for | Alloc Def, S | 6.87 | g | Average Unfoamer per year 1.86 oz./acre; Unfoamer- 12.5% active pesticide |
| Glyphosate {GLO}| market for | Alloc Def, S | 274.67 | g | 19.2 oz./ac of Glystar plus per year and 41% of glystar is glyphosate |
| Pesticide, unspecified {GLO}| market for | Alloc Def, S | 41.04 | g | 48.2% active dicamba; average Rifle 2.4 oz./acre per year |
| Ethoxylated alcohol (AE11) {GLO}| market for | Alloc Def, S | 4.91 | g | 8.15% active ethoxylated alcohol in Wetcit; 2 oz./ac applied on average per year |
| Pesticide, unspecified {GLO}| market for | Alloc Def, S | 11.39 | g | 22.8% active in Warrior II (Lambda-CY); 1.536 oz./ac applied on average per year |
| Dry_land_field_emissions_CH4-2C2 | 55 | lb. | 55 lbs. N per year on average |
| Processes |  |  |  |
| Diesel Combustion Emissions | 13.937664 | kg | 16.752 liter/acre; 0.832 kg/liter |

Table 32: Inputs to Simapro for Reduced tillage fallow (RTF-WW-SB) based on per acre (refer Table S1 section 2a for pesticide conversions)

| **Materials/Assemblies** | **Calculation** | **Units** | **Remarks** |
| --- | --- | --- | --- |
| Glyphosate {GLO}| market for | Alloc Def, S | 875.14+1237.83 | g | 48.7% glyphosate in 44.8 oz./acre Roundup Powermax on average per year; 48.8% glyphosate in 63.2 oz./acre Round up RT3 on average per year; |
| Pesticide, unspecified {GLO}| market for | Alloc Def, S | 54.27 | g | 80% of Gun smoke is pesticide, 1.92 oz./acre on average per year; |
| Pesticide, unspecified {GLO}| market for | Alloc Def, S | 1.78 | g | 50% active; Affinity broad spec .1 oz./acre on average per year; |
| Latex {GLO}| market for | Alloc Def, S | 12.29 | g | Tactic 0.64 oz./acre on average per year; 63.4% latex |
| Ethoxylated alcohol (AE3) {GLO}| market for | Alloc Def, S | 111.27 | g | Liberate 3.84 oz./acre on average per year; 100% ethoxylated alcohol |
| Pesticide, unspecified {GLO}| market for | Alloc Def, S | 4.38 | g | Silencer 1.4 oz./acre on average per year; 11.4% lambda cyhalothrin |
| Diesel {RoW}| market for | Alloc Def, S | 7.596*0.832 | kg | 7.596 liter/acre, 0.832 kg/liter |
| Pesticide, unspecified {GLO}| dichloropropene to generic market for | Alloc Def, S | 326.12+250.64 | g | 43.2% Paraquat dichloride in 22.2 oz./acre Paraquat concentrate on average per year and 30.1 % paraquat dichloride in 25.6 oz./acre cyclone on average per year; |
| Gasoline {RoW}| market for | Alloc Def, S | 0.229*.77 | kg | .229 liter/acre and .77 kg/liter |
| CO2_combustion emissions from Gasoline | 0.229*.77 | kg | .229 liter/acre and .77 kg/liter |
| Glyphosate {GLO}| market for | Alloc Def, S | 137.33 | g | 9.6 oz./acre of Glystar plus on average per year and it contains 41% of glyphosate and 59% inert; |
| Pesticide, unspecified {GLO}| market for | Alloc Def, S | 21.38 | g | 50% of choice is active pesticide; average choice in 5 years is 1.28 oz./acre per year |
| Pesticide, unspecified {GLO}| market for | Alloc Def, S | 1.33 | g | Average Unfoamer in 5 years 0.36 oz./acre; Unfoamer- 12.5% active pesticide |
| Pesticide, unspecified {GLO}| market for | Alloc Def, S | 41.04 | g | 48.2% active dicamba; average Rifle 2.4 oz./acre per year |
| Dry_land_field_emissions-3A-RTF_CH4 & N2O | 55 | lb. | 55lbs N per year on average |
| **Processes** |  |  |  |
| Diesel Combustion Emissions | 7.596*.832 | kg | 7.596 liter/acre, 0.832 kg/liter |

Table S33: Inputs to Simapro for Spring Barley (RTF-WW-SB) based on per acre (refer Table S1 section 2a for pesticide conversions)

| **Materials/Assemblies** | **Calculation** | **Units** | **Remarks** |
| --- | --- | --- | --- |
| Barley seed, for sowing {GLO}| market for | Alloc Def, S | 109.2 | lb. | Average seed rate 109.2 lb./acre per year |
| Nitrogen fertiliser, as N {RER}| urea ammonium nitrate production | Alloc Def, S | 55 | lb. | 55 lb. Urea ammonium nitrate (UAN) as N applied on average per year |
| Glyphosate {GLO}| market for | Alloc Def, S | 609.47+313.37 | G | 48.7% glyphosate in 31.2 oz./acre Roundup Powermax and 48.8% glyphosate in RT3 16 oz./acre per year on average |
| Pesticide, unspecified {GLO}| market for | Alloc Def, S | 168.54 | G | 100% active; Average Vendetta 5 oz./ acre per year |
| Pesticide, unspecified {GLO}| market for | Alloc Def, S | 1.83 | G | 50% active; Average Harmony 0.1 oz./acre per year |
| Pesticide, unspecified {GLO}| market for | Alloc Def, S | 2.14 | G | 50% active; Average Affinity broad spec 0.12 Oz/acre per year |
| Diesel, low-sulfur {RoW}| market for | Alloc Def, S | 10.696*0.832 | kg | 10.696 liter/acre a, 0.832 kg/liter |
| Sodium sulfate, anhydrite {RER}| market for | Alloc Def, S | 41.16/112.12*142.04 | lb. | 41.16 lb./acre average thiosulfate per year; Mol. wt. - 112.12; Mol. wt. sodium sulfate- 142.04; |
| Dry_land_field_emissions-3A-SB_CH4 & N2O | 55 | lb. | 55lbs N per year on average |
| Dry_land_field_emissions_CO2 | 54.19 | lb. | 54.194 lbs. of urea/acre; 196 lbs. /acre of fertilizer; 71% UAN=154.84; 35% Urea by weight=54.194 lbs. |
| Pesticide, unspecified {GLO}| dichloropropene to generic market for | Alloc Def, S | 326.12+250.64+105.97 | G | 43.2% Paraquat dichloride in 22.2 oz./acre Paraquat concentrate and 30.1 % paraquat dichloride in 25.6 oz./acre cyclone; 25% Paraquat dichloride in Gram Oxone; Average Gram Oxone is 12.8 oz./acre per year; |
| Pesticide, unspecified {GLO}| market for | Alloc Def, S | 4.38 | G | 11.4% active; Average Silencer 1.4 oz./acre per year |
| Latex {GLO}| market for | Alloc Def, S | 12.29 | G | Average Tactic 0.64 oz./acre per year and 63.4% latex, |
| Gasoline {RoW}| market for | Alloc Def, S | 0.229*.77 | kg | 0.229 liter/acre avgas,0.77 density of Gasoline |
| CO2_combustion emissions from Gasoline | 0.229*.77 | kg | 0.229 liter/acre avgas, 0.77 density of Gasoline |
| Pesticide, unspecified {GLO}| market for | Alloc Def, S | 72.36 | G | 80% of gun smoke is active pesticide; Average Gun smoke applied per year is 2.56 oz./ acre; |
| Pesticide, unspecified {GLO}| market for | Alloc Def, S | 70.24 | G | 65.7 % active in Brox-M; 3.2 oz. /acre is applied on average per year. |
| Ethoxylated alcohol (AE3) {GLO}| market for | Alloc Def, S | 129.82 | G | Liberate - 100% ethoxylated alcohol; Average Liberate applied per year is 4.48 oz./ acre |
| Pesticide, unspecified {GLO}| market for | Alloc Def, S | 2.43 | G | Average Unfoamer per year is 0.66 oz./acre; Unfoamer- 12.5% active pesticide; |
| Pesticide, unspecified {GLO}| market for | Alloc Def, S | 21.38 | G | 50% of choice is active pesticide; average choice per year is 1.28 oz./acre |
| Pesticide, unspecified {GLO}| market for | Alloc Def, S | 35.39 | G | 35% active pesticide; Average Huskie per year is 3 oz./acre |
| **Processes** |  |  |  |
| Diesel Combustion Emissions | 10.696*0.832 | kg | 10.696 liter/acre a, 0.832 kg/liter |

Table S34: Inputs to Simapro for Winter wheat (RTF-WW-SB) based on per acre (refer Table S1 section 2a for pesticide conversions)

| **Materials/Assemblies** | **Calculation** | **Units** | **Remarks** |
| --- | --- | --- | --- |
| Wheat seed, for sowing {GLO}| market for | Alloc Def, S | 114.75 | lb. | Average seed rate per year is 114.75 lb./acre |
| Nitrogen fertiliser, as N {RER}| urea ammonium nitrate production | Alloc Def, S | 55 | lb. | 55 lb. Urea ammonium nitrate (UAN) as N applied on average per year |
| Glyphosate {GLO}| market for | Alloc Def, S | 500.08 | g | 48.7% glyphosate in 25.6 oz./acre Roundup Powermax |
| Pesticide, unspecified {GLO}| market for | Alloc Def, S | 215.74 | g | active 100%; Vendetta; 6.4 oz./ acre on average per year |
| Pesticide, unspecified {GLO}| market for | Alloc Def, S | 1.83 | g | active 50%; Harmony; 0.1 oz./acre on average per year |
| Pesticide, unspecified {GLO}| market for | Alloc Def, S | 1.78 | g | active 50%; Affinity broad spec 0.1 oz./acre on average per year |
| Diesel, low-sulfur {RoW}| market for | Alloc Def, S | 10.4815*0.832 | kg | 10.4815 liter/acre a, 0.832 kg/liter |
| Sodium sulfate, anhydrite {RER}| market for | Alloc Def, S | 41.16/112.128*142.04 | lb. | Average 41.16 lb./acre thiosulfate per year, Mol. wt. - 112.128; Mol. wt. sodium sulfate- 142.04; |
| Dry_land_field_emissions-3A-WW_CH4 & N2O | 55 | lb. | 55 lbs. N per year on average |
| Dry_land_field_emissions_CO2 | 54.19 | lb. | 54.194 lbs. of urea/acre; 196 lbs. /acre of fertilizer; 71% UAN=154.84 lbs.; 35% Urea by weight=54.194 lbs. |
| Pesticide, unspecified {GLO}| dichloropropene to generic market for | Alloc Def, S | 326.126+250.64+105.978 | g | 43.2% Paraquat dichloride in 22.2 oz./acre Paraquat concentrate and 31.0 % paraquat dichloride in 25.6 oz./acre cyclone; 25% Paraquat dichloride in Gram Oxone; Average Gram Oxone is 12.8 oz./acre |
| Pesticide, unspecified {GLO}| market for | Alloc Def, S | 4.38 | g | Silencer 1.4 oz./acre on average per year, 11.4% main ingredients |
| Latex {GLO}| market for | Alloc Def, S | 12.29 | g | tactic 0.64 oz./acre on average per year and 63.4% latex, |
| Gasoline {RoW}| market for | Alloc Def, S | 0.229*.77 | Kg | 0.229 liter/acre avgas, 0.77 density of Gasoline, |
| CO2_combustion emissions from Gasoline | 0.229*.77 | Kg | 0.229 liter/acre avgas, 0.77 density of Gasoline, |
| Pesticide, unspecified {GLO}| market for | Alloc Def, S | 66.07 | G | 35% active pesticide; Average Huskie per year is 5.6 oz./acre |
| Pesticide, unspecified {GLO}| market for | Alloc Def, S | 2.33 | G | 1.9 oz./ac Osprey on average per year ;4.5% Meso-sulfuron |
| Ethoxylated alcohol (AE3) {GLO}| market for | Alloc Def, S | 111.27 | G | 3.84 oz./ac liberate on average per year (100% ethoxylated alcohol) |
| Pesticide, unspecified {GLO}| market for | Alloc Def, S | 16.60 | G | Fitness - 45% propiconazole; Average Fitness applied per year is 1.2 oz./ acre |
| Pesticide, unspecified {GLO}| market for | Alloc Def, S | 1.99 | G | Average Unfoamer per year is 0.54 oz./acre; Unfoamer- 12.5% active pesticide |
| Nitrogen fertiliser, as N {RER}| urea ammonium nitrate production | Alloc Def, S | 0.25 | lb. | Average solution 32 per year is 12.8 oz./acre; 1.28 lb./64 oz.; 0.256 lb./acre UAN |
| Pesticide, unspecified {GLO}| market for | Alloc Def, S | 54.27 | G | 80% of gun smoke is Pesticide; Average Gun smoke applied per year is 1.92 oz./ acre |
| **Processes** |  |  |  |
| Diesel Combustion Emissions | 10.4815*0.832 | Kg | 10.4815 liter/acre a, 0.832 kg/liter |

Table S35: Inputs to Simapro for Reduced tillage fallow based on per acre (Table S1 section 2a for pesticide conversions)

| **Materials/Assemblies** | **Calculation** | **Units** | **Remarks** |
| --- | --- | --- | --- |
| Glyphosate {GLO}| market for | Alloc Def, S | 875.14+1237.83 | G | 48.7% glyphosate in 44.8 oz./acre Roundup Powermax 48.8% glyphosate in 63.2 oz./acre Round up RT3 |
| Pesticide, unspecified {GLO}| market for | Alloc Def, S | 54.27 | G | 80% of Gun smoke is pesticide, 1.92 oz./acre |
| Pesticide, unspecified {GLO}| market for | Alloc Def, S | 1.78 | G | Affinity broad spec 0.1 oz./acre; 50% active |
| Latex {GLO}| market for | Alloc Def, S | 12.29 | G | tactic 0.64 oz./acre; 63.4% latex a |
| Ethoxylated alcohol (AE3) {GLO}| market for | Alloc Def, S | 111.27 | G | Liberate 3.84 oz./acre; 100% ethoxylated alcohol |
| Pesticide, unspecified {GLO}| market for | Alloc Def, S | 4.38 | G | Silencer 1.4 oz./acre; 11.4% lambda cyhalothrin |
| Diesel {RoW}| market for | Alloc Def, S | 7.8253*0.832 | Kg | 7.8253 liter/acre, 0.832 kg/liter |
| Pesticide, unspecified {GLO}| dichloropropene to generic market for | Alloc Def, S | 326.1+250.64 | G | 43.2% Paraquat dichloride in 22.2 oz./acre Paraquat concentrated and 31.0 % paraquat dichloride in 25.6 oz./acre cyclone |
| Gasoline {RoW}| market for | Alloc Def, S | 0.229*.77 | Kg | .229 liter/acre and 0.77 kg/liter |
| CO2_combustion emissions from Gasoline | 0.229*.77 | Kg | .229 liter/acre and 0.77 kg/liter |
| Glyphosate {GLO}| market for | Alloc Def, S | 137.33 | G | 9.6 oz./acre of Glystar plus and it contains 41% of glyphosate and 59% inert |
| Pesticide, unspecified {GLO}| market for | Alloc Def, S | 21.38 | G | 50% of choice is active pesticide; average choice per year is 1.28 oz./acre |
| Pesticide, unspecified {GLO}| market for | Alloc Def, S | 1.33 | G | Average Unfoamer per year0.36 oz./acre; Unfoamer- 12.5% active pesticide |
| Pesticide, unspecified {GLO}| market for | Alloc Def, S | 41.04 | G | 48.2% active dicamba; average Rifle 2.4 oz./acre |
| Dry_land_field_emissions-3B-RTF_CH4 & N2O | 55 | lb. | 55lbs N per year on average |
| **Processes** |  |  |  |
| Diesel Combustion Emissions | 7.8253*.832 | kg | 7.8253 liter/acre, 0.832 kg/liter |

Table S36: Inputs to Simapro for spring oilseed (RTF-WW-SO) based on per acre (refer Table S1 section 2a for pesticide conversions)

| **Materials/Assemblies** | **Calculation** | **units** | **Remarks** |
| --- | --- | --- | --- |
| Sunflower seed, for sowing {GLO}| market for | Alloc Def, S | 5.40 | lb. | Average seed rate 5.406 lb./acre per year |
| Nitrogen fertiliser, as N {RER}| urea ammonium nitrate production | Alloc Def, S | 55 | lb. | 79% UAN of 196 lb./acre applied every year and on an average of 55 lb. as N per year |
| Glyphosate {GLO}| market for | Alloc Def, S | 484.45+313.37 | G | 48.7% glyphosate in Roundup Powermax 48.8% glyphosate in Round up RT3; average round up powemax per year 24.8oz/acre and average roundup RT3 is 16 oz./acre per year. |
| Pesticide, unspecified {GLO}| market for | Alloc Def, S | 72.36 | G | 80% of gun smoke is Pesticide; Average Gun smoke applied per year is 2.56 oz./ acre |
| Ethoxylated alcohol (AE3) {GLO}| market for | Alloc Def, S | 92.73 | G | Liberate - 100% ethoxylated alcohol; Average Liberate applied in per year is 3.2 oz./ acre |
| Diesel, low-sulfur {RoW}| market for | Alloc Def, S | 10.624*0.832 | Kg | 10.624 liter/acre; 0.832 kg/liter |
| Sodium sulfate, anhydrite {RER}| market for | Alloc Def, S | 41.16/112.128*142.04 | lb. | Average of 41.16 lb./acre thiosulfate per year; Thiosulfate Mol. wt. - 112.1282; Mol. wt. sodium sulfate- 142.04; |
| Dry_land_field_emissions-3B-SO_CH4 & N2O | 55 | lb. | 55 lbs. N per year on average |
| Dry_land_field_emissions_CO2 | 54.19 | lb. | 54.194 lbs. of urea/acre; 196 lbs. /acre of fertilizer; 71% UAN=154.84 lbs.; 35% Urea by weight=54.194 lbs. |
| Pesticide, unspecified {GLO}| dichloropropene to generic market for | Alloc Def, S | 326.12+250.64+105.978 | g | 43.2% Paraquat dichloride in Paraquat concentrated(PC) and 30.1 % paraquat dichloride in cyclone and 25% Paraquat dichloride in Gram Oxone;  Average PC per year is 22.2 oz./acre; Average Cyclone per year is 25.6 oz./acre; Average Gram Oxone is 12.8 oz./acre |
| Pesticide, unspecified {GLO}| market for | Alloc Def, S | 4.38 | g | Silencer- 11.4% is pesticide; Average Silencer per year is 1.4 oz./acre |
| Latex {GLO}| market for | Alloc Def, S | 12.29 | g | tactic - 63.4% latex, Average tactic per year is 0.64 oz./acre |
| Gasoline {RoW}| market for | Alloc Def, S | 0.401*.77 | kg | 0.401 liter/acre avgas, 0.77 density of Gasoline |
| CO2_combustion emissions from Gasoline | 0.401*.77 | kg | 0.401 liter/acre avgas, 0.77 density of Gasoline |
| Pesticide, unspecified {GLO}| market for | Alloc Def, S | 21.38 | g | 50% of choice is active pesticide; average choice per year is 1.28 oz./acre |
| Pesticide, unspecified {GLO}| market for | Alloc Def, S | 1.7 | g | Average Unfoamer per year 0.46 oz./acre; Unfoamer- 12.5% active pesticide |
| Glyphosate {GLO}| market for | Alloc Def, S | 137.33 | g | 9.6 oz./ac of Glystar plus per year on average and 41% of glystar is glyphosate |
| Ethoxylated alcohol (AE11) {GLO}| market for | Alloc Def, S | 4.91 | g | 8.15% active ethoxylated alcohol in Wetcit; 2 oz./ac applied on average per year |
| Pesticide, unspecified {GLO}| market for | Alloc Def, S | 11.39 | g | 22.8% active in Warrior II (Lambda-CY); 1.536 oz./ac applied on average per year |
| Isopropylamine {GLO}| market for | Alloc Def, S | 120.89 | g | 33.5 % of Isopropyl amine, 10.8 oz./acre Land master |
| Pesticide, unspecified {GLO}| market for | Alloc Def, S | 7.45 | g | 10.3% Assure II active ingredients and 2.4 oz./ac is applied |
| Pesticide, unspecified {GLO}| market for | Alloc Def, S | 5.69 | g | 22.8% warrior II is active, and .768 oz./ac is applied |
| **Processes** |  |  |  |
| Diesel Combustion Emissions | 10.624*0.832 | kg | 10.624 liter/acre; 0.832 kg/liter |

Table S37: Inputs to Simapro for winter wheat (RTF-WW-SO) based on per acre (refer Table S1 section 2a for pesticide conversions)

| **Materials/Assemblies** | **Calculation** | **Units** | **Remarks** |
| --- | --- | --- | --- |
| Wheat seed, for sowing {GLO}| market for | Alloc Def, S | 114.75 | lb | average seed rate 114.75 lb./acre per year |
| Nitrogen fertiliser, as N {RER}| urea ammonium nitrate production | Alloc Def, S | 55 | lb | 79% UAN of 196 lb./acre every year and 55 as N per year |
| Glyphosate {GLO}| market for | Alloc Def, S | 500.08 | g | 48.7% glyphosate in 25.6 oz./acre Roundup Powermax |
| Pesticide, unspecified {GLO}| market for | Alloc Def, S | 215.74 | g | 100% active; Vendetta 6.4 oz./ acre |
| Pesticide, unspecified {GLO}| market for | Alloc Def, S | 1.83 | g | 50% active; Harmony 0.1 oz./acre |
| Pesticide, unspecified {GLO}| market for | Alloc Def, S | 1.78 | g | 50% active; Affinity broad spec 0.1 oz./acre |
| Diesel, low-sulfur {RoW}| market for | Alloc Def, S | 10.624*0.832 | kg | 10.624 liter/acre a, 0.832 kg/liter |
| Sodium sulfate, anhydrite {RER}| market for | Alloc Def, S | 41.16/112.128*142.04 | lb. | 41.16 lb./acre thiosulfate on average per year, Mol. wt. - 112.1282; Mol. wt. sodium sulfate- 142.04; |
| Dry_land_field_emissions-3B-WW_CH4 & N2O | 55 | lb. | 79% UAN of 196 lb./acre every year and 55 as N per year |
| Dry_land_field_emissions_CO2 | 54.19 | lb. | 54.194 lbs. of urea/acre; 196 lbs. /acre of fertilizer; 71% UAN=154.84; 35% Urea by weight=54.194 lbs. |
| Pesticide, unspecified {GLO}| dichloropropene to generic market for | Alloc Def, S | 326.12+250.64+105.978 | g | 43.2% Paraquat dichloride in 22.2 oz./acre Paraquat concentrated and 30.1 % paraquat dichloride in 25.6 oz./acre cyclone; 25% Paraquat dichloride in Gram Oxone; Average Gram Oxone is 12.8 oz./acre |
| Pesticide, unspecified {GLO}| market for | Alloc Def, S | 4.38 | g | Silencer 1.4 oz./acre, 11.4% main ingredients |
| Latex {GLO}| market for | Alloc Def, S | 12.29 | g | tactic 0.64 oz./acre and 63.4% latex, |
| Gasoline {RoW}| market for | Alloc Def, S | 0.229*.77 | kg | 0.229 liter/acre avgas, 0.77 density of Gasoline, |
| CO2_combustion emissions from Gasoline | 0.229*.77 | kg | 0.229 liter/acre avgas, 0.77 density of Gasoline, |
| Pesticide, unspecified {GLO}| market for | Alloc Def, S | 66.07 | g | 35% active pesticide; Average Huskie per year is 5.6 oz./acre |
| Pesticide, unspecified {GLO}| market for | Alloc Def, S | 2.33 | g | 1.9 oz./ac Osprey 4.5% Meso-sulfuron |
| Ethoxylated alcohol (AE3) {GLO}| market for | Alloc Def, S | 111.278 | g | 3.84 oz./ac liberate (100% ethoxylated alcohol) |
| Pesticide, unspecified {GLO}| market for | Alloc Def, S | 16.6 | g | Fitness - 45% propiconazole; Average Fitness applied per year is 1.2 oz./ acre |
| Pesticide, unspecified {GLO}| market for | Alloc Def, S | 1.99 | g | Average Unfoamer per year is 0.54 oz./acre; Unfoamer- 12.5% active pesticide |
| Nitrogen fertiliser, as N {RER}| urea ammonium nitrate production | Alloc Def, S | 0.25 | lb. | Average solution 32 per year is12.8 oz./acre; 1.28 lb./64 oz.; 0.256 lb./acre UAN |
| Pesticide, unspecified {GLO}| market for | Alloc Def, S | 54.27 | g | 80% of gun smoke is Pesticide; Average Gun smoke applied per year is 1.92 oz./ acre |
| **Processes** |  |  |  |
| Diesel Combustion Emissions | 10.624*0.832 | kg | 10.624 liter/acre a, 0.832 kg/liter |

Table S38: Inputs to Simapro for reduced tillage fallow (RTF-WO-SW) based on per acre (refer Table S1 section 2a for pesticide conversions)

| **Materials/Assemblies** | **Calculation** | **Units** | **Remarks** |
| --- | --- | --- | --- |
| Glyphosate {GLO}| market for | Alloc Def, S | 875.14+1237.839 | g | 48.7% glyphosate in 44.8 oz./acre Roundup Powermax 48.8% glyphosate in 63.2 oz./acre Round up RT3 |
| Pesticide, unspecified {GLO}| market for | Alloc Def, S | 54.27 | g | 80% of Gun smoke is pesticide, 1.92 oz./acre |
| Pesticide, unspecified {GLO}| market for | Alloc Def, S | 1.78 | g | 50% active; Affinity broad spec 0.1 oz./acre |
| Latex {GLO}| market for | Alloc Def, S | 12.29 | g | tactic 0.64 oz./acre 63.4% latex |
| Ethoxylated alcohol (AE3) {GLO}| market for | Alloc Def, S | 111.27 | g | Liberate 3.84 oz./acre 100% ethoxylated alcohol |
| Pesticide, unspecified {GLO}| market for | Alloc Def, S | 4.38 | g | Silencer 1.4 oz./acre, 11.4% lambda cyhalothrin |
| Diesel {RoW}| market for | Alloc Def, S | 7.596*0.832 | kg | 7.596 liter/acre, 0.832 kg/liter |
| Pesticide, unspecified {GLO}| dichloropropene to generic market for | Alloc Def, S | 326.1263+250.6401 | g | 43.2% Paraquat dichloride in 22.2 oz./acre Paraquat concentrated and 30.1 % paraquat dichloride in 25.6 oz./acre cyclone |
| Gasoline {RoW}| market for | Alloc Def, S | 0.229*.77 | kg | .229 liter/acre and .81 kg/liter |
| CO2_combustion emissions from Gasoline | 0.229*.77 | kg | .229 liter/acre and .81 kg/liter |
| Glyphosate {GLO}| market for | Alloc Def, S | 137.33 | g | 9.6 oz./ac of Glystar plus and it contains 41% of glyphosate and 59% inert |
| Pesticide, unspecified {GLO}| market for | Alloc Def, S | 21.38 | g | 50% of choice is active pesticide; average choice per year is 1.28 oz./acre |
| Pesticide, unspecified {GLO}| market for | Alloc Def, S | 1.33 | g | Average Unfoamer per year 0.36 oz./acre; Unfoamer- 12.5% active pesticide |
| Pesticide, unspecified {GLO}| market for | Alloc Def, S | 41.04 | g | 48.2% active dicamba; average Rifle 2.4 oz./acre per year |
| Dry_land_field_emissions-3C-RTF_CH4 & N2O | 55 | lb. | 55 lb./acre N applied on average per year |
| Processes |  |  |  |
| Diesel Combustion Emissions | 7.596*.832 | kg | 7.596 liter/acre, 0.832 kg/liter |

Table S39: Inputs to Simapro for spring wheat (RTF-WO-SW) based on per acre (refer Table S1 section 2a for pesticide conversions)

| **Materials/Assemblies** | **Calculation** | **Units** | **Remarks** |
| --- | --- | --- | --- |
| Wheat seed, for sowing {GLO}| market for | Alloc Def, S | 117.6 | lb. | average seed rate 117.6 lb./acre per year |
| Nitrogen fertiliser, as N {RER}| urea ammonium nitrate production | Alloc Def, S | 55 | lb. | 79% UAN of 196 lb./acre every year and 55 as N per year |
| Glyphosate {GLO}| market for | Alloc Def, S | 609.47+313.376 | g | 48.7% glyphosate in 31.2 oz./acre Roundup Powermax; 48.8% glyphosate in Round up RT3; Round up RT3 16 oz./ac |
| Pesticide, unspecified {GLO}| market for | Alloc Def, S | 168.54 | g | 100% active; Vendetta 5 oz./ acre |
| Pesticide, unspecified {GLO}| market for | Alloc Def, S | 1.83 | g | 50% active; Harmony 0.1 oz./acre |
| Pesticide, unspecified {GLO}| market for | Alloc Def, S | 2.14 | g | 50% active; Affinity broad spec 0.12 oz./acre |
| Diesel, low-sulfur {RoW}| market for | Alloc Def, S | 10.696*0.832 | kg | 10.696 liter/acre a, 0.832 kg/liter |
| Sodium sulfate, anhydrite {RER}| market for | Alloc Def, S | 41.16/112.128*142.04 | lb. | 41.16 lb./acre thiosulfate on average per year, Mol. wt. - 112.1282; Mol. wt. sodium sulfate- 142.04; |
| Dry_land_field_emissions-3C-SW_CH4 & N2O | 55 | lb. | 79% UAN of 196 lb./acre every year and 55 as N per year |
| Dry_land_field_emissions_CO2 | 54.19 | lb. | 54.194 lbs. of urea/acre; 196 lbs. /acre of fertilizer; 71% UAN=154.84 lbs.; 35% Urea by weight=54.194 lbs. |
| Pesticide, unspecified {GLO}| dichloropropene to generic market for | Alloc Def, S | 326.12+250.64+105.97 | g | 43.2% Paraquat dichloride in 22.2 oz./acre Paraquat concentrated and 30.1 % paraquat dichloride in 25.6 oz./acre cyclone; 25% Paraquat dichloride in Gram Oxone; Average Gram Oxone is 12.8 oz./acre |
| Pesticide, unspecified {GLO}| market for | Alloc Def, S | 4.38 | g | Silencer 1.4 oz./acre, 11.4% main ingredients |
| Latex {GLO}| market for | Alloc Def, S | 12.29 | g | tactic 0.64 oz./acre and 63.4% latex, |
| Gasoline {RoW}| market for | Alloc Def, S | 0.229*.77 | kg | 0.229 liter/acre avgas, 0.77 density of Gasoline, |
| CO2_combustion emissions from Gasoline | 0.229*.77 | kg | 0.229 liter/acre avgas, 0.77 density of Gasoline, |
| Pesticide, unspecified {GLO}| market for | Alloc Def, S | 35.39 | g | 35% active pesticide; Average Huskie per year is 3 oz./acre |
| Ethoxylated alcohol (AE3) {GLO}| market for | Alloc Def, S | 129.82 | g | 4.48 oz./ac liberate (100% ethoxylated alcohol) |
| Pesticide, unspecified {GLO}| market for | Alloc Def, S | 2.43 | g | Average Unfoamer per year is 0.66 oz./acre; Unfoamer- 12.5% active pesticide |
| Pesticide, unspecified {GLO}| market for | Alloc Def, S | 72.36 | g | 80% of gun smoke is Pesticide; Average Gun smoke applied per year is 2.56 oz./ acre |
| Pesticide, unspecified {GLO}| market for | Alloc Def, S | 21.38 | g | 50% of choice is active pesticide; average choice per year is 1.28 oz./acre |
| Pesticide, unspecified {GLO}| market for | Alloc Def, S | 70.24 | g | 65.7 % active in Brox-M, 3.2 oz./ac per year |
| Processes |  |  |  |
| Diesel Combustion Emissions | 10.696*0.832 | kg | 10.696 liter/acre a, 0.832 kg/liter |

Table S40: Inputs to Simapro for winter oilseed (RTF-WO-SW) based on per acre (refer Table S1 section 2a for pesticide conversions)

| **Materials/Assemblies** | **Calculation** | **Units** | **Remarks** |
| --- | --- | --- | --- |
| Sunflower seed, for sowing {GLO}| market for | Alloc Def, S | 5.08 | lb. | Average seed rate 5.0833 lb./acre in 5 years |
| Nitrogen fertiliser, as N {RER}| urea ammonium nitrate production | Alloc Def, S | 55 | lb. | 79% UAN of 196 lb./acre applied every year and on an average of 55 lb. as N per year |
| Glyphosate {GLO}| market for | Alloc Def, S | 188.02 | g | 48.8% glyphosate in Round up RT3; average roundup RT3 is 9.6 oz./acre per year. |
| Pesticide, unspecified {GLO}| market for | Alloc Def, S | 72.36 | g | 80% of gun smoke is Pesticide; Average Gun smoke applied per year is 2.56 oz./ acre |
| Ethoxylated alcohol (AE3) {GLO}| market for | Alloc Def, S | 55.63 | g | Liberate - 100% ethoxylated alcohol; Average Liberate applied in per year is 1.92 oz./ acre |
| Diesel, low-sulfur {RoW}| market for | Alloc Def, S | 10.1955*0.832 | kg | 10.1955 liter/acre; 0.832 kg/liter |
| Sodium sulfate, anhydrite {RER}| market for | Alloc Def, S | 41.16/112.128*142.04 | lb. | Average of 41.16 lb./acre thiosulfate per year; Thiosulfate Mol. wt. - 112.1282; Mol. wt. sodium sulfate- 142.04; |
| Dry_land_field_emissions-3C-WO_CH4 & N2O | 55 | lb. | 55 lbs. N per year on average |
| Dry_land_field_emissions_CO2 | 54.19 | lb. | 54.194 lbs. of urea/acre; 196 lbs. /acre of fertilizer; 71% UAN=154.84 lbs.; 35% Urea by weight=54.194 lbs. |
| Pesticide, unspecified {GLO}| dichloropropene to generic market for | Alloc Def, S | 176.28+250.64+105.97 | g | 43.2% Paraquat dichloride in Paraquat concentrated(PC) and 30.1 % paraquat dichloride in cyclone and 25% Paraquat dichloride in Gram Oxone; Average PC per year is 12 oz./acre; Average 5 years Cyclone is 25.6 oz./acre; Average Gram Oxone is 12.8 oz./acre |
| Pesticide, unspecified {GLO}| market for | Alloc Def, S | 4.38 | g | Silencer- 11.4% is pesticide; Average Silencer per year is 1.4 oz./acre |
| Latex {GLO}| market for | Alloc Def, S | 12.29 | g | tactic - 63.4% latex, Average Tactic per year is 0.64 oz./acre |
| Gasoline {RoW}| market for | Alloc Def, S | 0.315*.77 | kg | 0.315 liter/acre avgas, 0.77 density of Gasoline |
| CO2_combustion emissions from Gasoline | 0.315*.77 | kg | 0.315 liter/acre avgas, 0.77 density of Gasoline |
| Pesticide, unspecified {GLO}| market for | Alloc Def, S | 1.108 | G | Average Unfoamer per year is 0.3 oz./acre; Unfoamer- 12.5% active pesticide |
| Glyphosate {GLO}| market for | Alloc Def, S | 137.33 | G | 9.6 oz./ac of Glystar plus and 41% of glystar is glyphosate |
| Ethoxylated alcohol (AE11) {GLO}| market for | Alloc Def, S | 4.91 | G | 8.15% active ethoxylated alcohol in Wetcit; 2 oz./ac applied on average per year |
| Pesticide, unspecified {GLO}| market for | Alloc Def, S | 11.39 | G | 22.8% active in Warrior II (Lambda-CY); 1.536 oz./ac applied on average per year |
| Processes |  |  |  |
| Diesel Combustion Emissions | 10.1955*0.832 | kg | 10.1955 liter/acre; 0.832 kg/liter |

Table S41: Inputs to Simapro for reduced tillage fallow (RTF-SO-SW) based on per acre (refer Table S1 section 2a for pesticide conversions)

| **Materials/Assemblies** | **Calculation** | **Units** | **Remarks** |
| --- | --- | --- | --- |
| Glyphosate {GLO}| market for | Alloc Def, S | 875.1411+1112.488 | g | 48.7% glyphosate in 44.8 oz./acre Roundup Powermax; 48.8% glyphosate in 56.8 oz./acre Round up RT3 |
| Pesticide, unspecified {GLO}| market for | Alloc Def, S | 54.27 | g | 80% of Gun smoke is pesticide, 1.92 oz./acre per year |
| Pesticide, unspecified {GLO}| market for | Alloc Def, S | 1.788 | g | 50% active; Affinity broad spec .1 oz./acre |
| Latex {GLO}| market for | Alloc Def, S | 12.298 | g | Tactic 0.64 oz./acre 63.4% latex |
| Ethoxylated alcohol (AE3) {GLO}| market for | Alloc Def, S | 111.278 | g | Liberate 3.84 oz./acre 100% ethoxylated alcohol |
| Pesticide, unspecified {GLO}| market for | Alloc Def, S | 4.389 | g | Silencer 1.4 oz./acre, 11.4% lambda cyhalothrin |
| Diesel {RoW}| market for | Alloc Def, S | 7.596*0.832 | kg | 7.596 liter/acre, 0.832 kg/liter |
| Pesticide, unspecified {GLO}| dichloropropene to generic market for | Alloc Def, S | 326.1+250.6 | g | 43.2% Paraquat dichloride in 22.2 oz./acre Paraquat concentrated and 30.1 % paraquat dichloride in 25.6 oz./acre cyclone |
| Gasoline {RoW}| market for | Alloc Def, S | 0.229*.77 | kg | .229 liter/acre and .77 kg/liter |
| CO2_combustion emissions from Gasoline | 0.229*.77 | kg | .229 liter/acre and .77 kg/liter |
| Glyphosate {GLO}| market for | Alloc Def, S | 137.33 | g | 9.6 oz./ac of Glystar plus and it contains 41% of glyphosate and 59% inert |
| Pesticide, unspecified {GLO}| market for | Alloc Def, S | 21.38 | g | 50% of choice is active pesticide; average choice per year is 1.28 oz./acre |
| Pesticide, unspecified {GLO}| market for | Alloc Def, S | 1.33 | g | Average Unfoamer per year 0.36 oz./acre; Unfoamer- 12.5% active pesticide |
| Pesticide, unspecified {GLO}| market for | Alloc Def, S | 41.047 | g | 48.2% active dicamba; average Rifle 2.4 oz./acre per year |
| Dry_land_field_emissions-3D-RTF_CH4 & N2O | 55 | lb. | 55 lb. /acre N applied on average per year |
| **Processes** |  |  |  |
| Diesel Combustion Emissions | 7.596*.832 | kg | 7.596 liter/acre, 0.832 kg/liter |

Table S42: Inputs to Simapro for spring oilseed (RTF-SO-SW) based on per acre (refer Table S1 section 2a for pesticide conversions)

| **Materials/Assemblies** | **Calculation** | **Units** | **Remarks** |
| --- | --- | --- | --- |
| Sunflower seed, for sowing {GLO}| market for | Alloc Def, S | 5.406 | lb. | Average seed rate 5.406 lb./acre per year |
| Nitrogen fertiliser, as N {RER}| urea ammonium nitrate production | Alloc Def, S | 55 | lb. | 79% UAN of 196 lb./acre applied every year and on an average of 55 lb. as N per year |
| Glyphosate {GLO}| market for | Alloc Def, S | 484.45+313.37 | g | 48.8% glyphosate in Roundup Powermax 48.8% glyphosate in Round up RT3; average round up powemax per year 24.8oz/acre and average roundup RT3 is 16 oz./acre per year. |
| Pesticide, unspecified {GLO}| market for | Alloc Def, S | 72.36 | g | 80% of gun smoke is Pesticide; Average Gun smoke applied per year is 2.56 oz./ acre |
| Ethoxylated alcohol (AE3) {GLO}| market for | Alloc Def, S | 92.73 | g | Liberate - 100% ethoxylated alcohol; Average Liberate applied per year is 3.2 oz./ acre |
| Diesel, low-sulfur {RoW}| market for | Alloc Def, S | 10.624*0.832 | kg | 10.624 liter/acre; 0.832 kg/liter |
| Sodium sulfate, anhydrite {RER}| market for | Alloc Def, S | 41.16/112.128*142.04 | lb. | Average of 41.16 lb./acre thiosulfate per year; Thiosulfate Mol. wt. - 112.1282; Mol. wt. sodium sulfate- 142.04; |
| Dry_land_field_emissions-3D-SO_CH4 & N2O | 55 | lb. | N per year on average per year |
| Dry_land_field_emissions_CO2 | 54.194 | lb. | 54.194 lbs. of urea/acre; 196 lbs. /acre of fertilizer; 71% UAN=154.84 lbs.; 35% Urea by weight=54.194 lbs. |
| Pesticide, unspecified {GLO}| dichloropropene to generic market for | Alloc Def, S | 326.12+250.64+105.97 | g | 43.2% Paraquat dichloride in Paraquat concentrated(PC) and 30.1 % paraquat dichloride in cyclone and 25% Paraquat dichloride in Gram Oxone; Average PC per year is 22.2 oz./acre; Average Cyclone per year is 25.6 oz./acre; Average Gram Oxone is 12.8 oz./acre |
| Pesticide, unspecified {GLO}| market for | Alloc Def, S | 4.38 | g | Silencer-11.4% is pesticide; Average Silencer per year is 1.4 oz./acre |
| Latex {GLO}| market for | Alloc Def, S | 12.29 | g | Tactic - 63.4% latex, Average Tactic per year is 0.64 oz./acre |
| Gasoline {RoW}| market for | Alloc Def, S | 0.401*.77 | kg | 0.401 lit/acre avgas, 0.77 density of Gasoline |
| CO2_combustion emissions from Gasoline | 0.401*.77 | kg | 0.401 lit/acre avgas, 0.77 density of Gasoline |
| Pesticide, unspecified {GLO}| market for | Alloc Def, S | 21.38 | g | 50% of choice is active pesticide; average choice per year is 1.28 oz./acre |
| Pesticide, unspecified {GLO}| market for | Alloc Def, S | 1.7 | g | Average Unfoamer in per year is 0.46 oz./acre;  Unfoamer- 12.5% active pesticide |
| Glyphosate {GLO}| market for | Alloc Def, S | 137.33 | g | 9.6 oz./ac of Glystar plus per year and 41% of glystar is glyphosate |
| Ethoxylated alcohol (AE11) {GLO}| market for | Alloc Def, S | 4.91 | g | 8.15% active ethoxylated alcohol in Wetcit; 2 oz./ac applied on average per year |
| Pesticide, unspecified {GLO}| market for | Alloc Def, S | 11.39 | g | 22.8% active in Warrior II (Lambda-CY); 1.536 oz./ac applied on average per year |
| Isopropylamine {GLO}| market for | Alloc Def, S | 120.89 | g | 33.5 % of Isopropyl amine, 10.8 oz./acre Land master |
| Pesticide, unspecified {GLO}| market for | Alloc Def, S | 7.45 | g | 10.3% Assure II active ingredients and 2.4 oz./ac is applied |
| Pesticide, unspecified {GLO}| market for | Alloc Def, S | 5.69 | g | 22.8% warrior II is active, and .768 oz./ac is applied |
| **Processes** |  |  |  |
| Diesel Combustion Emissions | 10.624*0.832 | kg | 10.624 liter/acre; 0.832 kg/liter |

Table S43: Inputs to Simapro for spring wheat (RTF-SO-SW) based on per acre (refer Table S1 section 2a for pesticide conversions)

| **Materials/Assemblies** | **Calculation** | **Units** | **Remarks** |
| --- | --- | --- | --- |
| Wheat seed, for sowing {GLO}| market for | Alloc Def, S | 117.6 | lb. | average seed rate 117.6 lb./acre per year |
| Nitrogen fertiliser, as N {RER}| urea ammonium nitrate production | Alloc Def, S | 55 | lb. | 79% UAN of 196 lb./acre every year and 55 as N per year |
| Glyphosate {GLO}| market for | Alloc Def, S | 609.47+313.37 | g | 48.7% glyphosate in 31.2 oz./acre Roundup Powermax; 48.8% glyphosate in Round up RT3; Round up RT3 16 oz./ac |
| Pesticide, unspecified {GLO}| market for | Alloc Def, S | 168.54 | g | 100% active; Vendetta 5 oz./ acre per year |
| Pesticide, unspecified {GLO}| market for | Alloc Def, S | 1.833 | g | 50% active; Harmony .1 oz./acre per year |
| Pesticide, unspecified {GLO}| market for | Alloc Def, S | 2.146 | g | 50% active; Affinity broad spec 0.12 oz./acre per year |
| Diesel, low-sulfur {RoW}| market for | Alloc Def, S | 10.696*0.832 | kg | 10.696 liter/acre a, 0.832 kg/liter |
| Sodium sulfate, anhydrite {RER}| market for | Alloc Def, S | 41.16/112.128*142.04 | lb. | 41.16 lb./acre thiosulfate per year, Mol. wt. - 112.1282; Mol. wt. sodium sulfate- 142.04; |
| Dry_land_field_emissions-3D-SW_CH4 & N2O | 55 | lb. | 79% UAN of 196 lb./acre every year and 55 as N per year |
| Dry_land_field_emissions_CO2 | 54.194 | lb. | 54.194 lbs. of urea/acre; 196 lbs. /acre of fertilizer; 71% UAN=154.84 lbs.; 35% Urea by weight=54.194 lbs. |
| Pesticide, unspecified {GLO}| dichloropropene to generic market for | Alloc Def, S | 326.12+250.64+105.97 | g | 43.2% Paraquat dichloride in 22.2 oz./acre Paraquat concentrated and 30.1 % paraquat dichloride in 25.6 oz./acre cyclone; 25% Paraquat dichloride in Gram Oxone; Average Gram Oxone is 12.8 oz./acre |
| Pesticide, unspecified {GLO}| market for | Alloc Def, S | 4.389 | g | Silencer 1.4 oz./acre per year, 11.4% main ingredients |
| Latex {GLO}| market for | Alloc Def, S | 12.298 | g | Tactic 0.64 oz./acre per year and 63.4% latex, |
| Gasoline {RoW}| market for | Alloc Def, S | 0.229*.77 | kg | 0.229 liter/acre avgas, 0.77 density of Gasoline, |
| CO2_combustion emissions from Gasoline | 0.229*.77 | kg | 0.229 liter/acre avgas, 0.77 density of Gasoline, |
| Pesticide, unspecified {GLO}| market for | Alloc Def, S | 35.395 | g | 35% active pesticide; Average Huskie per year is 3 oz./acre |
| Ethoxylated alcohol (AE3) {GLO}| market for | Alloc Def, S | 129.82 | g | 4.48 oz./ac liberate per year (100% ethoxylated alcohol) |
| Pesticide, unspecified {GLO}| market for | Alloc Def, S | 2.439 | g | Average Unfoamer per year 0.66 oz./acre; Unfoamer- 12.5% active pesticide |
| Pesticide, unspecified {GLO}| market for | Alloc Def, S | 72.36 | g | 80% of gun smoke is Pesticide; Average Gun smoke applied per year is 2.56 oz./ acre |
| Pesticide, unspecified {GLO}| market for | Alloc Def, S | 21.38 | g | 50% of choice is active pesticide; average choice per year is 1.28 oz./acre |
| Pesticide, unspecified {GLO}| market for | Alloc Def, S | 70.249 | g | 65.7 % active in Brox-M, 3.2 oz./ac per year |
| **Processes** |  |  |  |
| Diesel Combustion Emissions | 10.696*0.832 | kg | 10.696 liter/acre a, 0.832 kg/liter |

Table S44: Inputs to Simapro for reduced tillage fallow (RTF-WO-ST) based on per acre (refer Table S1 section 2a for pesticide conversions)

| **Materials/Assemblies** | **Calculation** | **Units** | **Remarks** |
| --- | --- | --- | --- |
| Glyphosate {GLO}| market for | Alloc Def, S | 1250.202+1237.839 | g | 48.7% glyphosate in 64 oz./acre Roundup Powermax  48.8% glyphosate in 63.2 oz./acre Round up RT3 |
| Pesticide, unspecified {GLO}| market for | Alloc Def, S | 54.27 | g | 80% of Gun smoke is pesticide, 1.92 oz./acre per year |
| Pesticide, unspecified {GLO}| market for | Alloc Def, S | 1.788 | g | 50% active; Affinity broad spec .1 oz./acre per year |
| Latex {GLO}| market for | Alloc Def, S | 12.29 | g | Tactic 0.64 oz./acre per year; 63.4% latex |
| Ethoxylated alcohol (AE3) {GLO}| market for | Alloc Def, S | 111.2778 | g | Liberate 3.84 oz./acre per year; 100% ethoxylated alcohol |
| Pesticide, unspecified {GLO}| market for | Alloc Def, S | 4.389 | g | Silencer 1.4 oz./acre per year, 11.4% lambda cyhalothrin |
| Diesel {RoW}| market for | Alloc Def, S | 7.739*0.832 | kg | 7.739 liter/acre, 0.832 kg/liter |
| Pesticide, unspecified {GLO}| dichloropropene to generic market for | Alloc Def, S | 326.12+250.64 | g | 43.2% Paraquat dichloride in 22.2 oz./acre Paraquat concentrated and 30.1 % paraquat dichloride in 25.6 oz./acre cyclone |
| Gasoline {RoW}| market for | Alloc Def, S | 0.229*.77 | kg | .229 liter/acre and .77 kg/liter |
| CO2_combustion emissions from Gasoline | 0.229*.77 | kg | .229 liter/acre and .77 kg/liter |
| Glyphosate {GLO}| market for | Alloc Def, S | 137.33 | g | 9.6 oz./ac of Glystar plus per year and it contains 41% of glyphosate and 59% inert |
| Pesticide, unspecified {GLO}| market for | Alloc Def, S | 21.38 | g | 50% of choice is active pesticide; average choice per year is 1.28 oz./acre |
| Pesticide, unspecified {GLO}| market for | Alloc Def, S | 1.33 | g | Average Unfoamer per year 0.36 oz./acre; Unfoamer- 12.5% active pesticide |
| Pesticide, unspecified {GLO}| market for | Alloc Def, S | 41.04 | g | 48.2% active dicamba; average Rifle 2.4 oz./acre per year |
| Dry_land_field_emissions-3E-RTF_CH4 & N2O | 55 | lb. | 55 lb./ acre N applied on average per year |
| Processes |  |  |  |
| Diesel Combustion Emissions | 7.739*.832 | kg | 7.739 liter/acre, 0.832 kg/liter |

Table S45: Inputs to Simapro for spring triticale (RTF-WO-ST) based on per acre (refer Table S1 section 2a for pesticide conversions)

| **Materials/Assemblies** | **Calculation** | **Units** | **Remarks** |
| --- | --- | --- | --- |
| Rye seed, for sowing {GLO}| market for | Alloc Def, S | 100.6 | lb. | average seed rate 100.6 lb./acre per year |
| Nitrogen fertiliser, as N {RER}| urea ammonium nitrate production | Alloc Def, S | 55 | lb. | 79% UAN of 196 lb./acre every year and 55 as N per year |
| Glyphosate {GLO}| market for | Alloc Def, S | 609.47+313.37 | g | 48.7% glyphosate in 31.2 oz./acre Roundup Powermax; 48.8% glyphosate in Round up RT3 ; Round up RT3 16 oz./ac per year |
| Pesticide, unspecified {GLO}| market for | Alloc Def, S | 168.54 | g | 100% active; Vendetta 5 oz./ acre per year |
| Pesticide, unspecified {GLO}| market for | Alloc Def, S | 1.833 | g | 50% active; Harmony .1 oz./acre per year |
| Pesticide, unspecified {GLO}| market for | Alloc Def, S | 2.146 | g | 50% active; Affinity broad spec 0.12 oz./acre per year |
| Diesel, low-sulfur {RoW}| market for | Alloc Def, S | 10.481*0.832 | kg | 10.481 liter/acre, 0.832 kg/liter |
| Sodium sulfate, anhydrite {RER}| market for | Alloc Def, S | 41.16/112.128*142.04 | lb. | 41.16 lb./acre thiosulfate per year, Mol. wt. - 112.1282; Mol. wt. sodium sulfate- 142.04; |
| Dry_land_field_emissions-3E-ST_CH4 & N2O | 55 | lb. | 79% UAN of 196 lb./acre every year and 55 as N per year |
| Dry_land_field_emissions_CO2 | 54.194 | lb. | 54.194 lbs. of urea/acre; 196 lbs. /acre of fertilizer; 71% UAN=154.84 lbs.; 35% Urea by weight=54.194 lbs. |
| Pesticide, unspecified {GLO}| dichloropropene to generic market for | Alloc Def, S | 326.12+250.64+105.97 | g | 43.2% Paraquat dichloride in 22.2 oz./acre Paraquat concentrated and 30.1 % paraquat dichloride in 25.6 oz./acre cyclone; 25% Paraquat dichloride in Gram Oxone; Average Gram Oxone is 12.8 oz./acre |
| Pesticide, unspecified {GLO}| market for | Alloc Def, S | 4.38 | g | Silencer 1.4 oz./acre per year, 11.4% main ingredients |
| Latex {GLO}| market for | Alloc Def, S | 12.29 | g | Tactic 0.64 oz./acre per year and 63.4% latex, |
| Gasoline {RoW}| market for | Alloc Def, S | 0.229*.77 | kg | 0.229 liter/acre avgas, 0.77 density of Gasoline, |
| CO2_combustion emissions from Gasoline | 0.229*.77 | kg | 0.229 liter/acre avgas, 0.77 density of Gasoline, |
| Pesticide, unspecified {GLO}| market for | Alloc Def, S | 35.39 | g | 35% active pesticide; Average Huskie per year is 3 oz./acre |
| Ethoxylated alcohol (AE3) {GLO}| market for | Alloc Def, S | 129.82 | g | 4.48 oz./ac liberate per year (100% ethoxylated alcohol) |
| Pesticide, unspecified {GLO}| market for | Alloc Def, S | 2.439 | g | Average Unfoamer per year 0.66 oz./acre; Unfoamer- 12.5% active pesticide |
| Pesticide, unspecified {GLO}| market for | Alloc Def, S | 72.368 | g | 80% of gun smoke is Pesticide; Average Gun smoke applied per year is 2.56 oz./ acre |
| Pesticide, unspecified {GLO}| market for | Alloc Def, S | 21.385 | g | 50% of choice is active pesticide; average choice per year is 1.28 oz./acre |
| Pesticide, unspecified {GLO}| market for | Alloc Def, S | 70.249 | g | 65.7 % active in Brox-M, 3.2 oz./ac in use per year on average |
| **Processes** |  |  |  |
| Diesel Combustion Emissions | 10.481*0.832 | kg | 10.481 liter/acre a, 0.832 kg/liter |

Table S46: Inputs to Simapro for winter oilseed (RTF-WO-ST) based on per acre (refer Table S1 section 2a for pesticide conversions)

| **Materials/Assemblies** | **Calculation** | **Units** | **Remarks** |
| --- | --- | --- | --- |
| Sunflower seed, for sowing {GLO}| market for | Alloc Def, S | 5.464 | lb. | Average seed rate 5.464 lb./acre per year |
| Nitrogen fertiliser, as N {RER}| urea ammonium nitrate production | Alloc Def, S | 55 | lb. | 79% UAN of 196 lb./acre applied every year and on an average of 55 lb. as N per year |
| Glyphosate {GLO}| market for | Alloc Def, S | 188.02 | g | 48.8% glyphosate in Round up RT3; average roundup RT3 is 9.6 oz./acre per year |
| Pesticide, unspecified {GLO}| market for | Alloc Def, S | 72.36 | g | 80% of gun smoke is Pesticide; Average Gun smoke applied per year is 2.56 oz./ acre |
| Ethoxylated alcohol (AE3) {GLO}| market for | Alloc Def, S | 55.63 | g | Liberate - 100% ethoxylated alcohol; Average Liberate applied in per year is 1.92 oz./ acre |
| Diesel, low-sulfur {RoW}| market for | Alloc Def, S | 10.2815*0.832 | kg | 10.2815 liter/acre; 0.832 kg/liter |
| Sodium sulfate, anhydrite {RER}| market for | Alloc Def, S | 41.16/112.128*142.04 | lb. | Average of 41.16 lb./acre thiosulfate per year; Thiosulfate Mol. wt. - 112.1282; Mol. wt. sodium sulfate- 142.04; |
| Dry_land_field_emissions-3E-WO_CH4 & N2O | 55 | lb. | 55lbs N per year on average per year |
| Dry_land_field_emissions_CO2 | 54.194 | lb. | 54.194 lbs. of urea/acre; 196 lbs. /acre of fertilizer; 71% UAN=154.84 lbs.; 35% Urea by weight=54.194 lbs. |
| Pesticide, unspecified {GLO}| dichloropropene to generic market for | Alloc Def, S | 176.28+250.64+105.97 | g | 43.2% Paraquat dichloride in Paraquat concentrated(PC) and 30.1% paraquat dichloride in cyclone and 25% Paraquat dichloride in Gram Oxone; Average PC per year is 12 oz./acre; Average 5 years Cyclone is 25.6 oz./acre; Average Gram Oxone is 12.8 oz./acre |
| Pesticide, unspecified {GLO}| market for | Alloc Def, S | 4.389 | g | Silencer- 11.4% is pesticide; Average Silencer per year is 1.4 oz./acre |
| Latex {GLO}| market for | Alloc Def, S | 12.298 | g | Tactic - 63.4% latex, Average tactic per year is 0.64 oz./acre |
| Gasoline {RoW}| market for | Alloc Def, S | 0.229*.77 | kg | 0.229 liter/acre avgas, 0.77 density of Gasoline |
| CO2_combustion emissions from Gasoline | 0.229*.77 | kg | 0.229 liter/acre avgas, 0.77 density of Gasoline |
| Pesticide, unspecified {GLO}| market for | Alloc Def, S | 1.108 | g | Average Unfoamer per year 0.3 oz./acre; Unfoamer- 12.5% active pesticide |
| Glyphosate {GLO}| market for | Alloc Def, S | 137.33 | g | 9.6 oz./ac of Glystar plus per year and 41% of glystar is glyphosate |
| Ethoxylated alcohol (AE11) {GLO}| market for | Alloc Def, S | 4.91 | g | 8.15% active ethoxylated alcohol in Wetcit; 2 oz./ac applied on average per year |
| Pesticide, unspecified {GLO}| market for | Alloc Def, S | 11.39 | g | 22.8% active in Warrior II (Lambda-CY); 1.536 oz./ac applied on average per year |
| Processes |  |  |  |
| Diesel Combustion Emissions | 10.2815*0.832 | kg | 10.2815 liter/acre; 0.832 kg/liter |

Table S47: Inputs to Simapro for reduced tillage fallow (RTF-WT-SO) based on per acre (refer Table S1 section 2a for pesticide conversions)

| **Materials/Assemblies** | **Calculation** | **Units** | **Remarks** |
| --- | --- | --- | --- |
| Glyphosate {GLO}| market for | Alloc Def, S | 875.14+1237.83 | g | 48.7% glyphosate in 44.8 oz./acre Roundup Powermax 48.8% glyphosate in 63.2 oz./acre Round up RT3 |
| Pesticide, unspecified {GLO}| market for | Alloc Def, S | 54.27 | g | 80% of Gun smoke is pesticide, 1.92 oz./acre per year |
| Pesticide, unspecified {GLO}| market for | Alloc Def, S | 1.788 | g | 50% active; Affinity broad spec .1 oz./acre per year |
| Latex {GLO}| market for | Alloc Def, S | 12.29 | g | Tactic 0.64 oz./acre per year; 63.4% latex |
| Ethoxylated alcohol (AE3) {GLO}| market for | Alloc Def, S | 111.277 | g | Liberate 3.84 oz./acre 100% ethoxylated alcohol per year |
| Pesticide, unspecified {GLO}| market for | Alloc Def, S | 4.38 | g | Silencer 1.4 oz./acre, 11.4% lambda cyhalothrin per year |
| Diesel {RoW}| market for | Alloc Def, S | 7.682*0.832 | kg | 7.682 liter/acre, 0.832 kg/liter |
| Pesticide, unspecified {GLO}| dichloropropene to generic market for | Alloc Def, S | 326.12+250.64 | g | 43.2% Paraquat dichloride in 22.2 oz./acre Paraquat concentrated and 30.1 % paraquat dichloride in 25.6 oz./acre cyclone |
| Gasoline {RoW}| market for | Alloc Def, S | 0.229*.81 | kg | .229 liter/acre and .81 kg/liter |
| CO2_combustion emissions from Gasoline | 0.229*.77 | kg | 0.77 kg/liter and 0.229 liter/acre |
| Glyphosate {GLO}| market for | Alloc Def, S | 137.33 | g | 9.6 oz./ac of Glystar plus per year and it contains 41% of glyphosate and 59% inert |
| Pesticide, unspecified {GLO}| market for | Alloc Def, S | 21.38 | g | 50% of choice is active pesticide; average choice per year is 1.28 oz./acre |
| Pesticide, unspecified {GLO}| market for | Alloc Def, S | 1.33 | g | Average Unfoamer per year 0.36 oz./acre; Unfoamer- 12.5% active pesticide |
| Pesticide, unspecified {GLO}| market for | Alloc Def, S | 41.04 | g | 48.2% active dicamba; average Rifle 2.4 oz./acre |
| Dry_land_field_emissions-3F-RTF_CH4 & N2O | 55 | lb. | 55 lb./acre N applied on average per year |
| **Processes** |  |  |  |
| Diesel Combustion Emissions | 7.682*.832 | kg | 7.682 liter/acre, 0.832 kg/liter |

Table S48: Inputs to Simapro for spring oilseed (RTF-WT-SO) based on per acre (refer Table S1 section 2a for pesticide conversions)

| **Materials/Assemblies** | **Calculation** | **Units** | **Remarks** |
| --- | --- | --- | --- |
| Sunflower seed, for sowing {GLO}| market for | Alloc Def, S | 5.406 | lb. | Average seed rate 5.406 lb./acre per year |
| Nitrogen fertiliser, as N {RER}| urea ammonium nitrate production | Alloc Def, S | 55 | lb. | 79% UAN of 196 lb./acre applied every year and on an average of 55 lb. as N per year |
| Glyphosate {GLO}| market for | Alloc Def, S | 484.45+72.36 | g | 48.7% glyphosate in Roundup Powermax 48.8% glyphosate in Round up RT3; average round up powemax per year 24.8oz/acre and average roundup RT3 is 16 oz. /acre per year. |
| Pesticide, unspecified {GLO}| market for | Alloc Def, S | 72.36 | g | 80% of gun smoke is Pesticide; Average Gun smoke applied per year is 2.56 oz./ acre |
| Ethoxylated alcohol (AE3) {GLO}| market for | Alloc Def, S | 92.73 | g | Liberate - 100% ethoxylated alcohol; Average Liberate applied in 5years is 3.2 oz./ acre |
| Diesel, low-sulfur {RoW}| market for | Alloc Def, S | 10.624*0.832 | kg | 10.624 liter/acre; 0.832 kg/liter |
| Sodium sulfate, anhydrite {RER}| market for | Alloc Def, S | 41.16/112.128*142.04 | lb. | Average of 41.16 lb./acre thiosulfate per year; Thiosulfate Mol. wt. - 112.1282; Mol. wt. sodium sulfate- 142.04; |
| Dry_land_field_emissions-3F-SO_CH4 & N2O | 55 | lb. | 55lbs N per year on average per year |
| Dry_land_field_emissions_CO2 | 54.194 | lb. | 54.194 lbs. of urea/acre; 196 lbs. /acre of fertilizer; 71% UAN=154.84 lbs.; 35% Urea by weight=54.194 lbs. |
| Pesticide, unspecified {GLO}| dichloropropene to generic market for | Alloc Def, S | 326.12+250.64+105.97 | g | 43.2% Paraquat dichloride in Paraquat concentrated(PC) and 30.1% paraquat dichloride in cyclone and 25% Paraquat dichloride in Gram Oxone; Average PC per year is 22.2 oz./acre; Average Cyclone per year is 25.6 oz./acre; Average Gram Oxone is 12.8 Oz/acre |
| Pesticide, unspecified {GLO}| market for | Alloc Def, S | 4.389 | g | Silencer-11.4% is pesticide; Average Silencer per year is 1.4 oz./acre |
| Latex {GLO}| market for | Alloc Def, S | 12.298 | g | Tactic - 63.4% latex, Average Tactic per year is 0.64 oz./acre |
| Gasoline {RoW}| market for | Alloc Def, S | 0.401*.77 | kg | 0.401 liter/acre avgas, 0.77 density of Gasoline |
| CO2_combustion emissions from Gasoline | 0.401*.77 | kg | 0.401 liter/acre avgas, 0.77 density of Gasoline |
| Pesticide, unspecified {GLO}| market for | Alloc Def, S | 21.38 | g | 50% of choice is active pesticide; average choice per year is 1.28 oz./acre |
| Pesticide, unspecified {GLO}| market for | Alloc Def, S | 1.7 | g | Average Unfoamer per year 0.46 oz./acre; Unfoamer- 12.5% active pesticide |
| Glyphosate {GLO}| market for | Alloc Def, S | 137.33 | g | 9.6 oz./ac of Glystar plus per year and 41% of glystar is glyphosate |
| Ethoxylated alcohol (AE11) {GLO}| market for | Alloc Def, S | 4.916 | g | 8.15% active ethoxylated alcohol in Wetcit; 2 oz./ac applied on average per year |
| Pesticide, unspecified {GLO}| market for | Alloc Def, S | 11.39 | g | 22.8% active in Warrior II (Lambda-CY); 1.536 oz./ac applied on average per year |
| Isopropylamine {GLO}| market for | Alloc Def, S | 120.89 | g | 33.5 % of Isopropyl amine, 10.8 oz./acre Land master per year |
| Pesticide, unspecified {GLO}| market for | Alloc Def, S | 7.455 | g | 10.3% Assure II active ingredients and 2.4 oz./ac is applied per year |
| Pesticide, unspecified {GLO}| market for | Alloc Def, S | 5.695 | g | 22.8% warrior II is active, and .768 oz./ac is applied per year |
| **Processes** |  |  |  |
| Diesel Combustion Emissions | 10.624*0.832 | kg | 10.624 liter/acre; 0.832 kg/liter |

Table S49: Inputs to Simapro for winter triticale (RTF-WT-SO) based on per acre (refer Table S1 section 2a for pesticide conversions)

| **Materials/Assemblies** | **Calculation** | **Units** | **Remarks** |
| --- | --- | --- | --- |
| Rye seed, for sowing {GLO}| market for | Alloc Def, S | 115.5 | lb. | average seed rate 115.5 lb./acre per year |
| Nitrogen fertiliser, as N {RER}| urea ammonium nitrate production | Alloc Def, S | 55 | lb. | 79% UAN of 196 lb./acre every year and 55 as N per year |
| Glyphosate {GLO}| market for | Alloc Def, S | 500.08 | g | 48.7% glyphosate in 25.6 oz./acre Roundup Powermax per year; |
| Pesticide, unspecified {GLO}| market for | Alloc Def, S | 215.74 | g | 100% active; Vendetta 6.4 oz./ acre per year |
| Pesticide, unspecified {GLO}| market for | Alloc Def, S | 1.833 | g | 50% active; Harmony .1 oz./acre per year |
| Pesticide, unspecified {GLO}| market for | Alloc Def, S | 1.788 | g | Affinity broad spec 0.1 oz./acre per year; 50% active |
| Diesel, low-sulfur {RoW}| market for | Alloc Def, S | 10.481*0.832 | kg | 10.481 liter/acre a, 0.832 kg/liter |
| Sodium sulfate, anhydrite {RER}| market for | Alloc Def, S | 41.16/112.128*142.04 | lb. | 41.16 lb./acre thiosulfate on average per year, Mol. wt. - 112.1282; Mol. wt. sodium sulfate- 142.04; |
| Dry_land_field_emissions-3F-WT_CH4 & N2O | 55 | lb. | 79% UAN of 196 lb./acre every year and 55 as N per year |
| Dry_land_field_emissions_CO2 | 54.194 | lb. | 54.194 lbs. of urea/acre; 196 lbs. /acre of fertilizer; 71% UAN=154.84 lbs.; 35% Urea by weight=54.194 lbs. |
| Pesticide, unspecified {GLO}| dichloropropene to generic market for | Alloc Def, S | 326.12+250.64+105.97 | g | 43.2% Paraquat dichloride in 22.2 oz./acre Paraquat concentrated and 30.1% paraquat dichloride in 25.6 oz./acre cyclone; 25% Paraquat dichloride in Gram Oxone; Average Gram Oxone is 12.8 oz./acre |
| Pesticide, unspecified {GLO}| market for | Alloc Def, S | 4.38 | g | Silencer 1.4 oz./acre per year, 11.4% main ingredients |
| Latex {GLO}| market for | Alloc Def, S | 12.29 | g | Tactic 0.64 oz./acre per year and 63.4% latex, |
| Gasoline {RoW}| market for | Alloc Def, S | 0.229*.77 | kg | 0.229 liter/acre avgas, 0.77 density of Gasoline, |
| CO2_combustion emissions from Gasoline | 0.229*.77 | kg | 0.229 liter/acre avgas, 0.77 density of Gasoline, |
| Pesticide, unspecified {GLO}| market for | Alloc Def, S | 66.07 | g | 35% active pesticide; Average Huskie per year is 5.6 oz./acre |
| Ethoxylated alcohol (AE3) {GLO}| market for | Alloc Def, S | 111.277 | g | 3.84 oz./ac liberate per year (100% ethoxylated alcohol) |
| Pesticide, unspecified {GLO}| market for | Alloc Def, S | 1.995 | g | Average Unfoamer per year is 0.54 oz./acre; Unfoamer- 12.5% active pesticide |
| Pesticide, unspecified {GLO}| market for | Alloc Def, S | 54.276 | g | 80% of gun smoke is Pesticide; Average Gun smoke applied per year is 1.92 oz./ acre |
| Pesticide, unspecified {GLO}| market for | Alloc Def, S | 1.1689 | g | 0.95 oz./ac Osprey per year; 4.5% Meso-sulfuron |
| Pesticide, unspecified {GLO}| market for | Alloc Def, S | 16.6 | g | Fitness - 45% propiconazole per year; Average Fitness applied per year is 1.2 oz./ acre |
| Nitrogen fertiliser, as N {RER}| urea ammonium nitrate production | Alloc Def, S | 0.256 | lb. | Average solution 32 per year 12.8 oz./acre; 1.28 lb./64 oz.; 0.256 lb./acre UAN |
| **Processes** |  |  |  |
| Diesel Combustion Emissions | 10.481*0.832 | kg | 10.481 liter/acre a, 0.832 kg/liter |

Section 2B: This section gives the information on different ecoprofiles created in SimaPro for the field emissions per lb N applies and combustion emissions. A detailed description of calculations of allocation factors for mass, market and energy are tabulated.

**Table of Content for Section 2B**

| **Table No** | **Content** | **Page no** |
| --- | --- | --- |
| S50 | Dry_land_field_emissions_CH4-SF-WW (1 lb. N applied) | 88 |
| S51 | Dry_land_field_emissions_N2O- SF-WW (1 lb. N applied) | 88 |
| S52 | Dry_land_field_emissions_CH4- RTF-WW (1 lb. N applied) | 88 |
| S53 | Dry_land_field_emissions_N2O- RTF-WW (1 lb. N applied) | 88 |
| S54 | Dry_land_field_emissions_CH4- RTF-WW-RTF-WO (1 lb. N applied) | 88 |
| S55 | Dry_land_field_emissions_N2O- RTF-WW -WO-RTF (1 lb. N applied) | 89 |
| S56 | Dry_land_field_emissions_CH4- RTF-WO -WW-RTF (1 lb. N applied) | 89 |
| S57 | Dry_land_field_emissions_N2O- RTF-WO -WW-RTF (1 lb. N applied) | 89 |
| S58 | Dry_land_field_emissions-RTF (RTF-WW-SB) _CH4 & N2O (1 lb. N applied) | 89 |
| S59 | Dry_land_field_emissions-SB (RTF-WW-SB) CH4 & N2O (1 lb. N applied) | 89 |
| S60 | Dry_land_field_emissions--WW (RTF-WW-SB) CH4 & N2O (1 lb. N applied) | 90 |
| S61 | Dry_land_field_emissions-SO (RTF-WW-SO) CH4 & N2O (1 lb. N applied) | 90 |
| S62 | Dry_land_field_emissions--WW (RTF-WW-SO) CH4 & N2O (1 lb. N applied) | 90 |
| S63 | Dry_land_field_emissions--RTF (RTF-WW-SO) CH4 & N2O (1 lb. N applied) | 90 |
| S64 | Dry_land_field_emissions--RTF (RTF-WO-SW) CH4 & N2O (1 lb. N applied) | 90 |
| S65 | Dry_land_field_emissions--SW (RTF-WO-SW) CH4 & N2O (1 lb. N applied) | 91 |
| S66 | Dry_land_field_emissions--WO (RTF-WO-SW) CH4 & N2O (1 lb. N applied) | 91 |
| S67 | Dry_land_field_emissions-3D-RTF (RTF-SO-SW) CH4 & N2O (1 lb. N applied) | 91 |
| S68 | Dry_land_field_emissions--SO (RTF-SO-SW) CH4 & N2O (1 lb. N applied) | 91 |
| S69 | Dry_land_field_emissions--SW (RTF-SO-SW) CH4 & N2O (1 lb. N applied) | 91 |
| S70 | Dry_land_field_emissions--RTF (RTF-WO-ST) CH4 & N2O (1 lb. N applied) | 92 |
| S71 | Dry_land_field_emissions--ST (RTF-WO-ST) CH4 & N2O (1 lb. N applied) | 92 |
| S72 | Dry_land_field_emissions--WO (RTF-WO-ST) CH4 & N2O (1 lb. N applied) | 92 |
| S73 | Dry_land_field_emissions-RTF (RTF-WT-SO) CH4 & N2O (1 lb. N applied) | 92 |
| S74 | Dry_land_field_emissions--SO (RTF-WT-SO) CH4 & N2O (1 lb. N applied) | 92 |
| S75 | Dry_land_field_emissions--WT (RTF-WT-SO) CH4 & N2O (1 lb. N applied) | 93 |
| S76 | Dry_land_field_emissions_CO2 (1 kg Urea) | 93 |
| S77 | Gasoline combustion_emissions (1 kg Gasoline) | 93 |
| S78 | Diesel combustion_emissions (1 kg Diesel) | 93 |

**Table S50: Dry_land_field_emissions_CH4-SF-WW (1 lb. N applied)**

| Methane | -0.829/55 | kg | Undefined | Emissions from WW using EF of -0.829 kg CH4/acre/year; Total N 55 lbs. |
| --- | --- | --- | --- | --- |
| Methane | -0.641/55 | kg | Undefined | Emissions from SF using EF of -0.641 kg CH4/acre/year; Total N 55 lbs. |

**Table S51: Dry_land_field_emissions_N2O- SF-WW (1 lb. N applied)**

| Dinitrogen monoxide | 0.11/55 | kg | Emissions from WW using EF of 0.110 kg N2O/acre/year; Total N 55 lbs. |
| --- | --- | --- | --- |
| Dinitrogen monoxide | 0.2/55 | kg | Emissions from SF using EF of 0.2 kg N2O/acre/year; Total N 55 lbs. |

**Table S52: Dry_land_field_emissions_CH4-** **RTF-WW (1 lb. N applied)**

| Methane | -0.625/55 | kg | Emissions from WW using EF of -0.625 kg CH4/acre/year; Total N 55 lbs. |
| --- | --- | --- | --- |
| Methane | -0.641/55 | kg | Emissions from RTF using EF of -0.641 kg CH4/acre/year; Total N 55 lbs. |

**Table S53: Dry_land_field_emissions_N2O- RTF-WW (1 lb. N applied)**

| Dinitrogen monoxide | 0.258/55 | Kg | Emissions from WW using EF of 0.258 kg N2O/acre/year; Total N 55 lbs. |
| --- | --- | --- | --- |
| Dinitrogen monoxide | 0.368/55 | Kg | Emissions from RTF using EF of 0.368 kg N2O/acre/year; Total N 55 lbs. |

**Table S54: Dry_land_field_emissions_CH4- RTF-WW -WO-RTF (1 lb. N applied)**

| Methane | -0.779/55 | Kg | Emissions from WW using EF of -0.779 kg CH4/acre/year; Total N 55 lbs. |
| --- | --- | --- | --- |
| Methane | -0.641/55 | Kg | Emissions from RTF using EF of -0.641 kg CH4/acre/year; Total N 55 lbs. |

**Table S55: Dry_land_field_emissions_N2O- RTF-WW -WO-RTF (1 lb. N applied)**

| Dinitrogen monoxide | 0.301/55 | Kg | Emissions from WW using EF of 0.301 kg N2O/acre/year; Total N 55 lbs. |
| --- | --- | --- | --- |
| Dinitrogen monoxide | 0.368/55 | Kg | Emissions from RTF using EF of 0.368 kg N2O/acre/year; Total N 55 lbs. |

**Table S56: Dry_land_field_emissions_CH4- RTF-WO -WW-RTF (1 lb. N applied)**

| Methane | -0.779/55 | Kg | Emissions from WO using EF of -0.640 kg CH4/acre/year; Total N 55 lbs. |
| --- | --- | --- | --- |
| Methane | -0.514/55 | Kg | Emissions from RTF using EF of -0.742 kg CH4/acre/year; Total N 55 lbs. |

**Table S57: Dry_land_field_emissions_N2O- RTF-WO- WW-RTF (1 lb. N applied)**

| Dinitrogen monoxide | 0.206/55 | kg | Emissions from WO using EF of 0.206 kg N2O/acre/year; Total N 55 lbs. |
| --- | --- | --- | --- |
| Dinitrogen monoxide | 0.159/55 | kg | Emissions from RTF using EF of 0.159 kg N2O/acre/year; Total N 55 lbs. |

**Table S58: Dry_land_field_emissions-RTF (RTF-WW-SB) _CH4 & N2O (1 lb. N applied)**

| Dinitrogen monoxide | 0.237/55 | kg | Emissions from RTF using EF of 0.237 kg N2O/acre/year; Total N 55 lbs. |
| --- | --- | --- | --- |
| Methane | -0.691/55 | kg | Emissions from RTF using EF of -0.691 kg CH4/acre/year; Total N 55 lbs. |

**Table S59: Dry_land_field_emissions-SB (RTF-WW-SB) CH4 & N2O (1 lb. N applied)**

| Dinitrogen monoxide | 0.303/55 | kg | Emissions from RTF using EF of 0.303 kg N2O/acre/year; Total N 55 lbs. |
| --- | --- | --- | --- |
| Methane | -0.438/55 | kg | Emissions from RTF using EF of -0.438 kg CH4/acre/year; Total N 55 lbs. |

**Table S60: Dry_land_field_emissions--WW (RTF-WW-SB) CH4 & N2O (1 lb. N applied)**

| Dinitrogen monoxide | 0.172/55 | kg | Emissions from RTF using EF of 0.172 kg N2O/acre/year; Total N 55 lbs. |
| --- | --- | --- | --- |
| Methane | -0.705/55 | kg | Emissions from RTF using EF of -0.705 kg CH4/acre/year; Total N 55 lbs. |

**Table S61: Dry_land_field_emissions-SO (RTF-WW-SO) CH4 & N2O (1 lb. N applied)**

| Dinitrogen monoxide | 0.323/55 | kg | Emissions from RTF using EF of 0.323 kg N2O/acre/year; Total N 55 lbs. |
| --- | --- | --- | --- |
| Methane | -0.542/55 | kg | Emissions from RTF using EF of -0.542 kg CH4/acre/year; Total N 55 lbs. |

**Table S62: Dry_land_field_emissions--WW (RTF-WW-SO) CH4 & N2O (1 lb. N applied)**

| Dinitrogen monoxide | 0.209/55 | kg | Emissions from RTF using EF of 0.209 kg N2O/acre/year; Total N 55 lbs. |
| --- | --- | --- | --- |
| Methane | -0.684/55 | kg | Emissions from RTF using EF of -0.684 kg CH4/acre/year; Total N 55 lbs. |

**Table S63: Dry_land_field_emissions--RTF (RTF-WW-SO) CH4 & N2O (1 lb. N applied)**

| Dinitrogen monoxide | 0.268/55 | kg | Emissions from RTF using EF of 0.268 kg N2O/acre/year; Total N 55 lbs. |
| --- | --- | --- | --- |
| Methane | -0.616/55 | kg | Emissions from RTF using EF of -0.616 kg CH4/acre/year; Total N 55 lbs. |

**Table S64: Dry_land_field_emissions--RTF (RTF-WO-SW) CH4 & N2O (1 lb. N applied)**

| Dinitrogen monoxide | 0.159/55 | kg | Emissions from RTF using EF of 0.159 kg N2O/acre/year; Total N 55 lbs. |
| --- | --- | --- | --- |
| Methane | -0.640/55 | kg | Emissions from RTF using EF of -0.640 kg CH4/acre/year; Total N 55 lbs. |

**Table S65: Dry_land_field_emissions--SW (RTF-WO-SW) CH4 & N2O (1 lb. N applied)**

| Dinitrogen monoxide | 0.303/55 | kg | Emissions from RTF using EF of 0.303 kg N2O/acre/year; Total N 55 lbs. |
| --- | --- | --- | --- |
| Methane | -0.438/55 | kg | Emissions from RTF using EF of -0.438 kg CH4/acre/year; Total N 55 lbs. |

**Table S66: Dry_land_field_emissions--WO (RTF-WO-SW) CH4 & N2O (1 lb. N applied)**

| Dinitrogen monoxide | 0.206/55 | kg | Emissions from RTF using EF of 0.206 kg N2O/acre/year; Total N 55 lbs. |
| --- | --- | --- | --- |
| Methane | -0.640/55 | kg | Emissions from RTF using EF of -0.640 kg CH4/acre/year; Total N 55 lbs. |

**Table S67: Dry_land_field_emissions-3D-RTF (RTF-SO-SW) CH4 & N2O (1 lb. N applied)**

| Dinitrogen monoxide | 0.368/55 | kg | Emissions from RTF using EF of 0.368 kg N2O/acre/year; Total N 55 lbs. |
| --- | --- | --- | --- |
| Methane | -0.514/55 | kg | Emissions from RTF using EF of -0.514 kg CH4/acre/year; Total N 55 lbs. |

**Table S68: Dry_land_field_emissions--SO (RTF-SO-SW) CH4 & N2O (1 lb. N applied)**

| Dinitrogen monoxide | 0.206/55 | kg | Emissions from RTF using EF of 0.206 kg N2O/acre/year; Total N 55 lbs. |
| --- | --- | --- | --- |
| Methane | -0.533/55 | kg | Emissions from RTF using EF of -0.533 kg CH4/acre/year ; Total N 55 lbs. |

**Table S69: Dry_land_field_emissions--SW (RTF-SO-SW) CH4 & N2O (1 lb. N applied)**

| Dinitrogen monoxide | 0.303/55 | kg | Emissions from RTF using EF of 0.303 kg N2O/acre/year; Total N 55 lbs. |
| --- | --- | --- | --- |
| Methane | -0.438/55 | kg | Emissions from RTF using EF of -0.438 kg CH4/acre/year; Total N 55 lbs. |

**Table S70: Dry_land_field_emissions--RTF (RTF-WO-ST) CH4 & N2O (1 lb. N applied)**

| Dinitrogen monoxide | 0.2/55 | kg | Emissions from RTF using EF of 0.200 kg N2O/acre/year; Total N 55 lbs. |
| --- | --- | --- | --- |
| Methane | -0.641/55 | kg | Emissions from RTF using EF of -0.641 kg CH4/acre/year; Total N 55 lbs. |

**Table S71: Dry_land_field_emissions--ST (RTF-WO-ST) CH4 & N2O (1 lb. N applied)**

| Dinitrogen monoxide | 0.303/55 | kg | Emissions from RTF using EF of 0.303 kg N2O/acre/year; Total N 55 lbs. |
| --- | --- | --- | --- |
| Methane | -0.438/55 | kg | Emissions from RTF using EF of -0.438 kg CH4/acre/year; Total N 55 lbs. |

**Table S72: Dry_land_field_emissions--WO (RTF-WO-ST) CH4 & N2O (1 lb. N applied)**

| Dinitrogen monoxide | 0.274/55 | kg | Emissions from RTF using EF of 0.274 kg N2O/acre/year; Total N 55 lbs. |
| --- | --- | --- | --- |
| Methane | -0.721/55 | kg | Emissions from RTF using EF of -0.721 kg CH4/acre/year; Total N 55 lbs. |

**Table S73: Dry_land_field_emissions-RTF (RTF-WT-SO) CH4 & N2O (1 lb. N applied)**

| Dinitrogen monoxide | 0.268/55 | kg | Emissions from RTF using EF of 0.268 kg N2O/acre/year; Total N 55 lbs. |
| --- | --- | --- | --- |
| Methane | -0.616/55 | kg | Emissions from RTF using EF of -0.616 kg CH4/acre/year; Total N 55 lbs. |

**Table S74: Dry_land_field_emissions--SO (RTF-WT-SO) CH4 & N2O (1 lb. N applied)**

| Dinitrogen monoxide | 0.474/55 | kg | Emissions from RTF using EF of 0.474 kg N2O/acre/year; Total N 55 lbs. |
| --- | --- | --- | --- |
| Methane | -0.485/55 | kg | Emissions from RTF using EF of -0.485 kg CH4/acre/year; Total N 55 lbs. |

**Table S75: Dry_land_field_emissions--WT (RTF-WT-SO) CH4 & N2O (1 lb. N applied)**

| Dinitrogen monoxide | 0.172/55 | kg | Emissions from RTF using EF of 0.172 kg N2O/acre/year; Total N 55 lbs. |
| --- | --- | --- | --- |
| Methane | -0.705/55 | kg | Emissions from RTF using EF of -0.705 kg CH4/acre/year; Total N 55 lbs. |

**Table S76: Dry_land_field_emissions_CO2 (1 kg Urea)**

| Carbon dioxide | 0.1998*44/12 | kg | 0.1998 kg C/kg Urea;44/12=3.6667 kg CO2/kg C;0.733 kg CO2/kg Urea; |
| --- | --- | --- | --- |

**Table S77: Gasoline combustion_emissions (1 kg Gasoline)**

| Carbon dioxide | (8.31/3.78541)/.77 | Kg | 3.78541 lit/gallon; 8.31 kg CO2/ gallon [1] ; 0.77 kg/li density [2] |
| --- | --- | --- | --- |
| Methane | (.00047/3.78541)/.77 | Kg | .47 g CH4/ gallon gasoline [1] |
| Dinitrogen monoxide | (0.00009/3.78541)/.77 | Kg | .09 g N2O / gallon gasoline [1] |

**Table S78: Diesel combustion_emissions (1 kg Diesel)**

| Carbon dioxide | (10.21/3.78541)/.8321 | Kg | 3.78541 lit/gallon;10.21 kg CO2/ gallon [1] ; 0.8321 kg/lit density [3] |
| --- | --- | --- | --- |

**Section 3A**: Gives information on market value allocation (MVA) of different 2-yr and 3-yr cropping systems:

Figures 3A1, 3A2, and 3A3 show emission intensity results similar to Figures 3-5 in the main manuscript except for using MVA for the 3-yr rotations. Greenhouse gas emissions increase slightly for WW in RTF-WW-SB because the market value of SB is much less than that of WW so most of emissions from RTF are allocated to WW (Figure 3A1). Emissions from wheat in the RTF-WW-SO, RTF-WO-SW, and RTF-SO-SW rotations are decreased when expressed on a mass allocation basis because the unit price for the oilseed crop is double that for the wheat crop, making the allocation less to wheat and decreases emission intensity. Among all wheat crops, RTF-WW-SB stands out to be the lowest in GHG emissions with 0.30 kg CO2 eq./kg grain whereas RTF-SO-SW is highest with 1.02 kg CO2 eq./kg grain. The least emissions of RTF-WW-SB is because of high yield and lower input load of winter wheat, which over weights the unit value allocation due to low yield of SB compared to WW.

Figure 3A1: Greenhouse gas emissions of winter wheat (WW) and spring wheat (SW) in different crop rotations based on market value allocation. The 2-yr crops do not change from Figures 3-5.

Greenhouse gas emissions increase for all the rotations compared to mass allocation, due to high percentage distribution of RTF based on higher oilseed prices compared to other food crops (Figure 3A2). Among all rotations, winter oilseed in RTF-WO-SW has the least emissions with 0.77 kg CO2 eq./kg oilseed and spring oilseed in RTF-WT-SO has the highest emissions with 1.90 kg CO2 eq./kg oilseed.

Figure 3A2: Greenhouse gas emissions of different oilseed crop rotation based on market value allocation. The 2-yr crops do not change from Figures 3-5.

Emissions are lower with market value allocation compared to mass allocation for spring barley, spring triticale, and winter triticale due to their low yields and allocation for winter wheat in RTF-WW-SB dominated by price because of high yield and less allocation to spring barley, thereby decreasing its emissions compared to mass allocation (Figure 3A3). Similarly, for other crops with relatively low yields, the oilseed price dominates the triticale price and RTF is allocated less to triticale which leads to lower emissions. The least emissions out of all other crops is from spring barley in RTF-WW-SB with 0.79 kg CO2 eq./kg barley and highest emissions are from spring triticale in RTF-WO-ST with 1.79 kg CO2 eq./kg triticale.

Figure 3A3: Greenhouse gas emissions of spring barley (SB), spring triticale (ST), and winter triticale (WT) in other crop rotations based on market value allocation.

# **References**

Cline PV, Delfino JJ, Suresh P, Rao C (1991) Partitioning of aromatic constituents into water from gasoline and other complex solvent mixtures. Environ Sci Technol 25.5:914-920

Eriksson G et al (2009) Combustion characterization of rapeseed meal and possible combustion applications. Energy Fuels 23.8:3930-3939

Mehta PS, Anand K (2009) Estimation of a lower heating value of vegetable oil and biodiesel fuel. Energy Fuels 23.8:3893-3898

Stationary combustion emission factors, Solid, gaseous, liquid and biomass fuels: Federal Register (2009) EPA; 40 CFR Parts 86, 87, 89 et al; Mandatory Reporting of Greenhouse Gases; Final Rule, 30Oct09, 261 pp. Tables C-1 and C-2 at FR pp 56409-56410

Yadav ShR et al (2005) Estimation of petrol and diesel adulteration with kerosene and assessment of usefulness of selected automobile fuel quality test parameters. Environ Sci Technol 1.4:253-255
